# Supplementary material for: RhIII-catalyzed dual directing group assisted sterically hindered C–H bond activation: a unique route to meta and ortho substituted benzofurans
Source: Royal Society of Chemistry journal article supplement (doi:10.1039/c4ob01876a), 2014-01-01
Supplement: c4ob01876a1.pdf [file c4ob01876a1.pdf]

**Rh<sup>III</sup>-catalyzed dual directing group assisted sterically hindered  
C-H bond activation: a unique route to *meta* and *ortho*  
substituted benzofurans**

*Chien-Hung Yeh, Wei-Chen Chen, Parthasarathy Gandeepan, Ya-Chun Hong,  
Cheng-Hung Shih, Chien-Hong Cheng\**

Department of Chemistry, National Tsing Hua University, Hsinchu, 30013, Taiwan

[chcheng@mx.nthu.edu.tw](mailto:chcheng@mx.nthu.edu.tw)

**Supporting Information**

| <b>Table of Contents</b>                                                    | <b>Page No</b> |
|-----------------------------------------------------------------------------|----------------|
| Experimental Section                                                        | S-2            |
| Deuterium Labeling Studies of Compounds <b>1a</b> , <b>1b</b> and <b>1o</b> | S-3            |
| Optimization Studies                                                        | S-6            |
| Synthesis and Characterization Data of Oximes                               | S-7            |
| Characterization Data of Benzofuran Derivatives                             | S-13           |
| NOE and NOESY Experiments of <b>3ag</b>                                     | S-22           |
| References                                                                  | S-24           |
| <sup>1</sup> H and <sup>13</sup> C NMR Spectra                              | S-25           |
| X-Ray Data of <b>3aa</b> , <b>3ga</b> , and <b>3ma</b>                      | S-65           |

## General Methods.

### General Procedure for the Rh(III)–Catalyzed Synthesis of Benzofurans

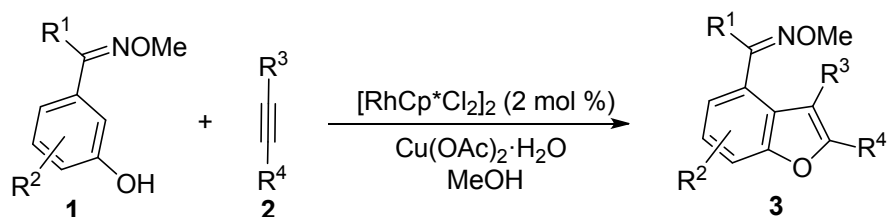

A seal tube initially fitted with a rubber septum containing a magnetic stir bar, oxime **1** (0.20 mmol), alkyne **2** (0.30 mmol), [RhCp\*Cl<sub>2</sub>]<sub>2</sub> (0.0040 mmol, 2.0 mol %) and Cu(OAc)<sub>2</sub>·H<sub>2</sub>O (0.70 mmol) was evacuated and purged with nitrogen gas three times. Then, MeOH (1.0 mL) was added to the system via syringe under a stream of nitrogen and the septum was replaced with a screw cap. The reaction mixture was allowed to stir at the indicated temperature for 12 to 48 h. When the reaction was complete, the mixture was cooled to room temperature, diluted with EtOAc and filtered through a Celite pad. The filtrate was concentrated and the residue was purified by flash column chromatography (silica gel, hexane/EtOAc) to give the corresponding product **3**.

## Deuterium Labeling Study of **1a**

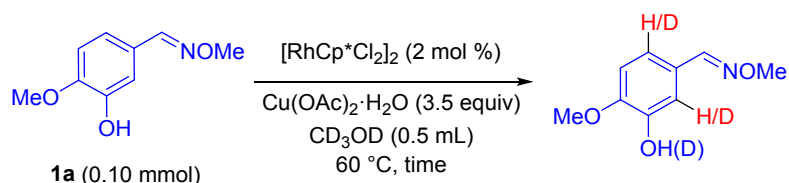

A seal tube initially fitted with a rubber septum containing a magnetic stir bar, oxime **1a** (0.1 mmol),  $[\text{RhCp}^*\text{Cl}_2]_2$  (0.0020 mmol, 2.0 mol %), and  $\text{Cu}(\text{OAc})_2 \cdot \text{H}_2\text{O}$  (0.35 mmol) was evacuated and purged with nitrogen gas three times. Then,  $\text{CD}_3\text{OD}$  (0.5 mL) was added to the system via syringe under a stream of nitrogen and the septum was replaced with a screw cap. The reaction mixture was allowed to stir at 60 °C for 1, 5, and 24 h. When the reaction was complete, the mixture was cooled to room temperature, diluted with EtOAc and filtered through a Celite pad. The filtrate was evaporated in vacuum and the H/D exchange ratio was determined by  $^1\text{H}$  NMR integration.

### $^1\text{H}$ NMR Spectra for Deuterium Labeling Study of Compound **1a**

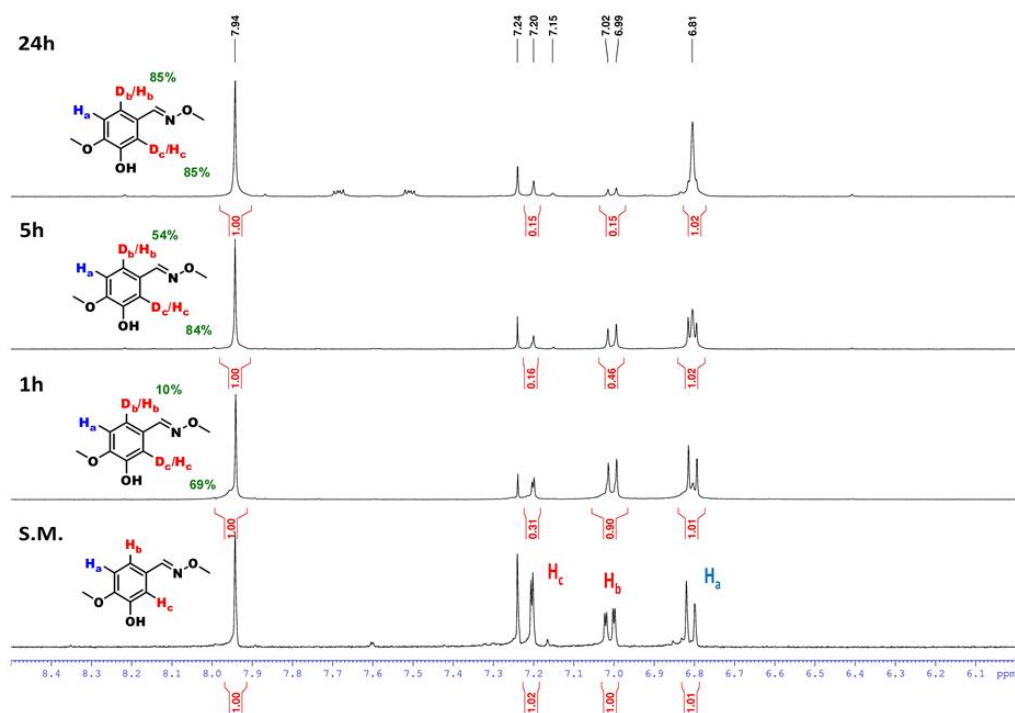

## Deuterium Labeling Study of **1b**

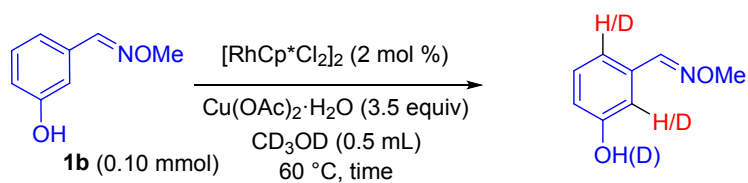

A seal tube initially fitted with a rubber septum containing a magnetic stir bar, oxime **1b** (0.10 mmol),  $[\text{RhCp}^*\text{Cl}_2]_2$  (0.002 mmol, 2.0 mol %), and  $\text{Cu}(\text{OAc})_2\cdot\text{H}_2\text{O}$  (0.350 mmol) was evacuated and purged with nitrogen gas three times. Then,  $\text{CD}_3\text{OD}$  (0.50 mL) was added to the system via syringe under a stream of nitrogen and the septum was replaced with a screw cap. The reaction mixture was allowed to stir at  $60^\circ\text{C}$  for 1, 5, and 24 h. When the reaction was complete, the mixture was cooled to room temperature, diluted with EtOAc and filtered through a Celite pad. The filtrate was evaporated in vacuum and the H/D exchange ratio was confirmed by  $^1\text{H}$  NMR.

### $^1\text{H}$ NMR Spectra for Deuterium Labeling Study of Compound **1b**

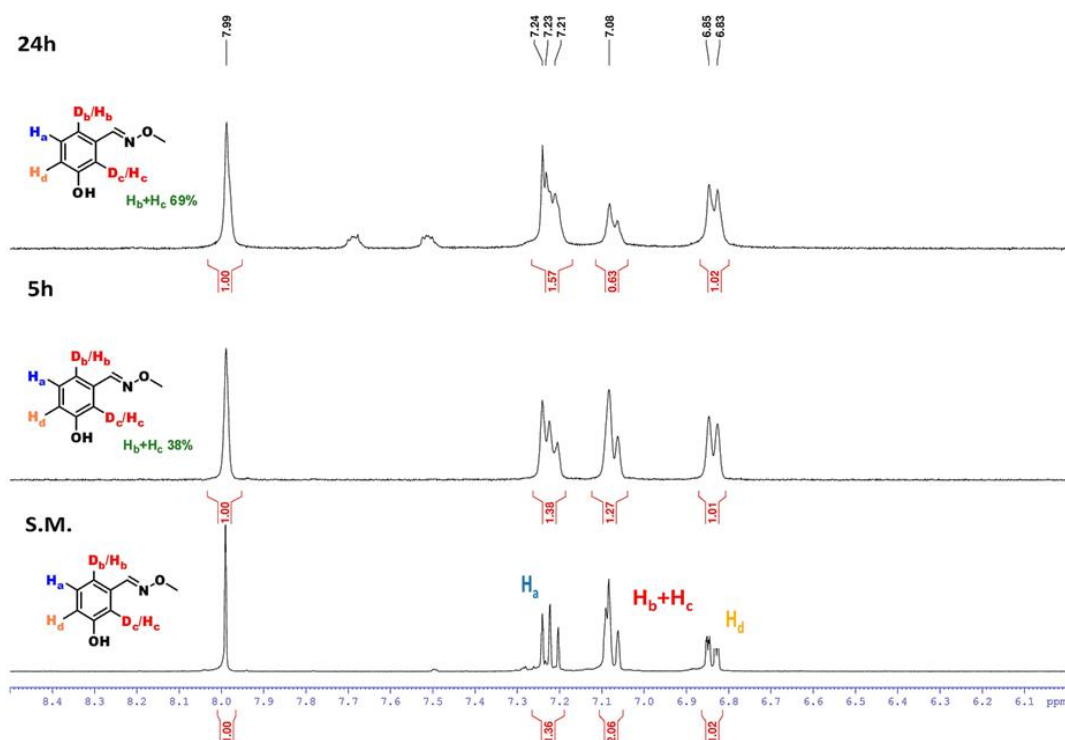

## Deuterium Labeling Study of **1o**

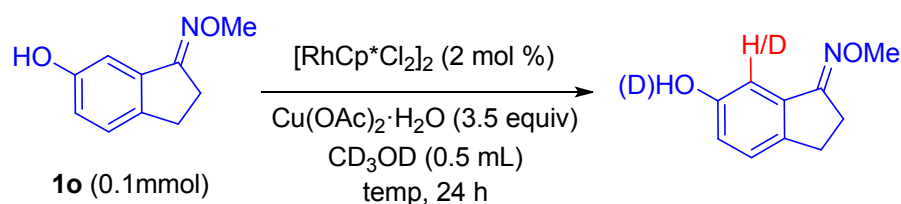

A seal tube initially fitted with a rubber septum containing magnetic stir bar, oxime **1o** (0.1 mmol),  $[\text{RhCp}^*\text{Cl}_2]_2$  (0.002 mmol, 2.0 mol %) and  $\text{Cu(OAc)}_2 \cdot \text{H}_2\text{O}$  (0.35 mmol) was evacuated and purged with nitrogen gas three times. Then,  $\text{CD}_3\text{OD}$  (0.5 mL) was added to the system via syringe under a stream of nitrogen and the septum was replaced with a screw cap. The reaction mixture was allowed to stir at 60 and 100 °C for 24 h. When the reaction was complete, the mixture was cooled to room temperature, diluted with EtOAc and filtered through a Celite pad. The filtrate was evaporated in vacuum and confirmed by  $^1\text{H}$  NMR.

## $^1\text{H}$ NMR Spectra for Deuterium Labeling Study of Compound **1o**

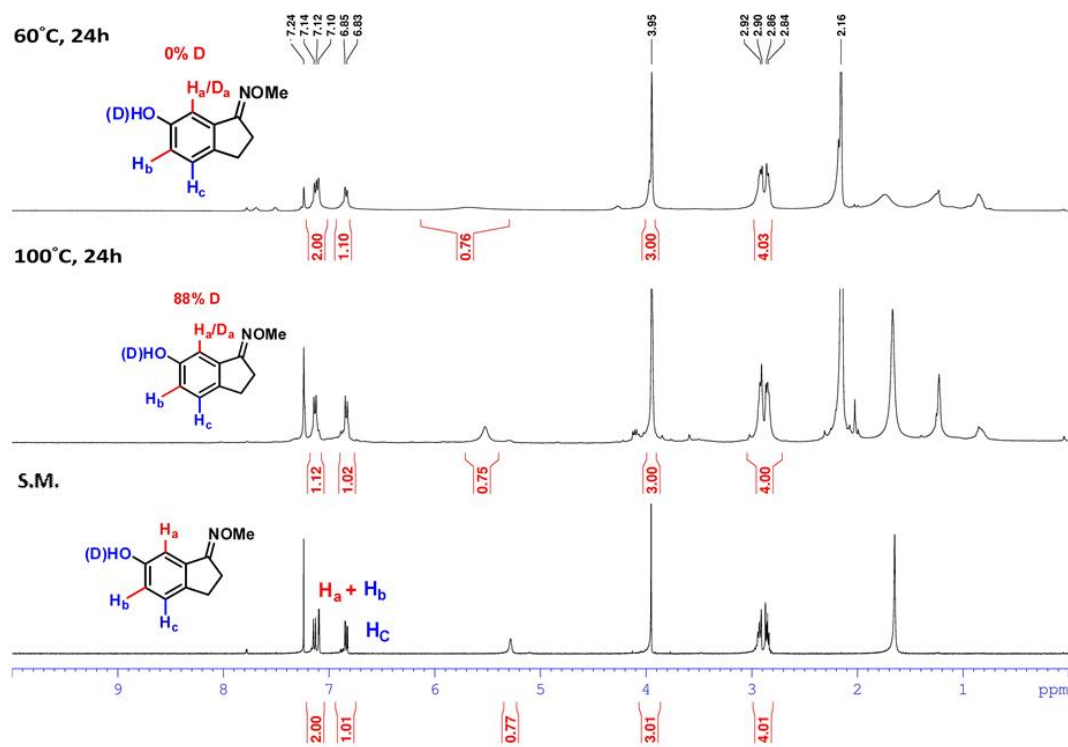

**Table S1.** Optimization Studies for the Synthesis of Benzofuran **3aa**<sup>a</sup>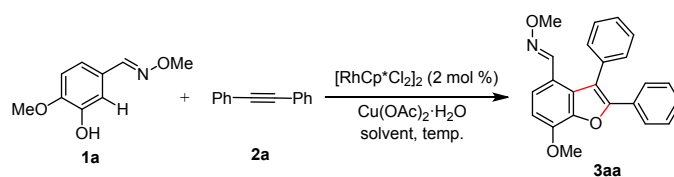

| Entry                 | Additive                          | <b>2a</b><br>(mmol) | Solvent          | <i>T</i> (°C) | Yield/Conv.<br>(%) <sup>b,c</sup> |
|-----------------------|-----------------------------------|---------------------|------------------|---------------|-----------------------------------|
| 1 <sup>d</sup>        |                                   | 2.0                 | <i>t</i> -amylOH | 100           | 55/60                             |
| 2                     |                                   | 2.0                 | <i>t</i> -amylOH | 100           | 56/69                             |
| 3 <sup>e</sup>        | O <sub>2</sub><br>(1 atm)         | 2.0                 | <i>t</i> -amylOH | 100           | 13/90                             |
| 4 <sup>d</sup>        |                                   | 2.0                 | 1,4-dioxane      | 100           | 43/59                             |
| 5 <sup>d</sup>        |                                   | 2.0                 | EtOH             | 80            | 62/86                             |
| 6                     |                                   | 1.5                 | MeOH             | 80            | 52/65                             |
| 7                     |                                   | 2.0                 | MeOH             | 80            | 79/90                             |
| 8                     | AgSbF <sub>6</sub><br>(0.02 mmol) | 1.5                 | MeOH             | 80            | 53/88                             |
| 9                     | AgBF <sub>4</sub><br>(0.02 mmol)  | 1.5                 | MeOH             | 80            | 52/89                             |
| 10                    | AcOH<br>(0.02 mmol)               | 1.5                 | MeOH             | 80            | 5/90                              |
| <b>11<sup>f</sup></b> |                                   | <b>1.5</b>          | <b>MeOH</b>      | <b>60</b>     | <b>83/95</b>                      |
| 12                    |                                   | 2.0                 | toluene          | 100           | 65/65                             |
| 13                    |                                   | 2.0                 | toluene          | 130           | 51/70                             |
| 14                    |                                   | 2.0                 | <i>O</i> -xylene | 130           | 43/50                             |
| 15                    |                                   | 2.0                 | benzene          | 100           | 62/73                             |
| 16                    |                                   | 2.0                 | hexane           | 100           | 36/66                             |
| 17                    |                                   | 2.0                 | decane           | 130           | 38/75                             |
| 18                    |                                   | 2.0                 | chlorobenzene    | 100           | 68/74                             |
| 19                    |                                   | 2.0                 | chlorobenzene    | 130           | 45/77                             |
| 20                    |                                   | 2.0                 | fluorobenzene    | 100           | 58/80                             |

<sup>a</sup> Conditions: **1a** (0.1 mmol),  $\text{Cu}(\text{OAc})_2 \cdot \text{H}_2\text{O}$  (0.35 mmol) and  $[\text{RhCp}^*\text{Cl}_2]_2$  (2 mol %) in solvent (0.5 mL) under N<sub>2</sub> for 20 h, unless otherwise noted. <sup>b</sup> Yields were determined by NMR integration method using mesitylene as internal standard. <sup>c</sup> Conversions of **1a** were determined by crude <sup>1</sup>H NMR. <sup>d</sup>  $\text{Cu}(\text{OAc})_2 \cdot \text{H}_2\text{O}$  (0.20 mmol) was used. <sup>e</sup>  $\text{Cu}(\text{OAc})_2 \cdot \text{H}_2\text{O}$  (0.05 mmol) was used. <sup>f</sup> Reaction time: 30 h.

## Synthesis and Characterization of Starting Materials

### 3-Hydroxy-4-methoxybenzaldehyde *O*-methyl oxime (1a)

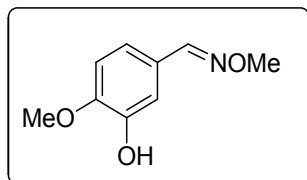

Compound **1a** was prepared using modified procedure from reported method.<sup>1</sup> 3-hydroxy-4-methoxybenzaldehyde (1.5 g, 10 mmol, 1.0 equiv) was added to the solution of MeONH<sub>2</sub>·HCl (1.0 g, 12 mmol, 1.2 equiv), and pyridine (3.2 g, 40 mmol, 4.0 equiv) in CH<sub>2</sub>Cl<sub>2</sub> (1 M, 10 mL). The solution was stirred for 24 h at room temperature. After completion of the reaction, the solvent was removed under vacuo. The remaining residue was dissolved in CH<sub>2</sub>Cl<sub>2</sub> and filtered through a short pad of silica gel. The filtrate was concentrated and purified by silica flash chromatography (hexane–EtOAc) to give the corresponding product as white solid (1.6 g, 88%).

$R_f$  = 0.61 (50% ethyl acetate in *n*-hexane); mp: 50-52 °C; **<sup>1</sup>H NMR (400 MHz, CDCl<sub>3</sub>)**:  $\delta$  = 7.96 (s, 1H), 7.22 (d,  $J$  = 2.0 Hz, 1H), 7.02 (dd,  $J$  = 8.4, 2.0 Hz, 1H), 6.82 (d,  $J$  = 8.4 Hz, 1H), 5.71 (s, OH), 3.94 (s, 3H), 3.90 (s, 3H); **<sup>13</sup>C NMR (100 MHz, CDCl<sub>3</sub>)**:  $\delta$  = 148.2, 148.1, 145.8, 125.6, 120.1, 112.3, 110.4, 61.8, 55.9; **HRMS (EI<sup>+</sup>)**: calcd for C<sub>9</sub>H<sub>11</sub>NO<sub>3</sub> 181.0739, found 181.0735; **IR (KBr, cm<sup>-1</sup>)**: 3450, 2938 and 1612.

### 3-Hydroxybenzaldehyde *O*-methyl oxime (1b)

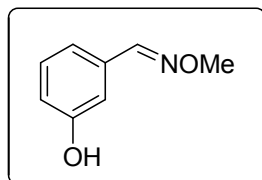

Compound **1b** was prepared from 3-hydroxybenzaldehyde using the synthetic procedure for **1a**;  $R_f$  = 0.29 (20% ethyl acetate in *n*-hexane); white solid; mp: 62-64 °C; **<sup>1</sup>H NMR (400 MHz, CDCl<sub>3</sub>)**:  $\delta$  = 8.01(s, 1H), 7.26-7.08 (m, 3H), 6.87-6.85 (m, 1H), 5.69 (s, OH), 3.97 (s, 3H); **<sup>13</sup>C NMR (100 MHz, CDCl<sub>3</sub>)**:  $\delta$  = 155.8, 148.6, 135.5, 130.0, 120.2, 117.2, 113.0, 62.0; **HRMS (EI<sup>+</sup>)**: calcd for C<sub>8</sub>H<sub>9</sub>NO<sub>2</sub> 151.0633, found 151.0630; **IR (KBr, cm<sup>-1</sup>)**: 3363, 2938 and 1581.

### 3-Hydroxy-4,5-dimethoxybenzaldehyde *O*-methyl oxime (1c)

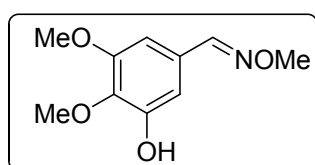

This product was prepared from 3-hydroxy-4,5-dimethoxybenzaldehyde by following the synthetic procedure for **1a**;  $R_f$  = 0.38 (30% ethyl acetate in *n*-hexane); brown oil; **<sup>1</sup>H NMR (400 MHz, CDCl<sub>3</sub>)**:  $\delta$  = 7.91 (s, 1H), 6.78 (s, 1H), 6.74 (s, 1H), 5.79 (s, 1H), 3.94 (s, 3H), 3.89 (s, 3H), 3.88 (s, 3H); **<sup>13</sup>C NMR (100 MHz, CDCl<sub>3</sub>)**:  $\delta$  = 152.6, 149.4, 148.2, 136.9, 128.1, 108.0, 101.9, 62.0,

61.0, 55.9; **HRMS (EI<sup>+</sup>)**: calcd for C<sub>10</sub>H<sub>13</sub>NO<sub>4</sub> 211.0845, found 211.0847; **IR (KBr, cm<sup>-1</sup>)**: 3402, 2939 and 1581.

### 2-Bromo-5-hydroxybenzaldehyde *O*-methyl oxime (1d)

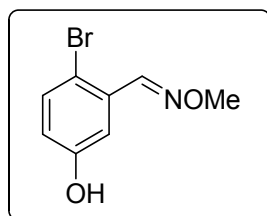

Compound **1d** was prepared from 2-bromo-5-hydroxybenzaldehyde using the the synthetic procedure of **1a**.<sup>2</sup>  $R_f$  = 0.45 (30% ethyl acetate in *n*-hexane); white solid; mp: 81-83 °C; **<sup>1</sup>H NMR (400 MHz, CDCl<sub>3</sub>)**:  $\delta$  = 8.37 (s, 1H), 7.37 (d,  $J$  = 8.8 Hz, 1H), 7.30 (d,  $J$  = 2.8 Hz, 1H), 6.73 (dd,  $J$  = 8.8, 3.2 Hz, 1H), 5.92 (s, OH), 3.96 (s, 3H); **<sup>13</sup>C NMR (100 MHz, CDCl<sub>3</sub>)**:  $\delta$  = 154.9, 148.1, 134.0, 132.0, 119.1, 114.5, 113.6, 62.2; **HRMS (EI<sup>+</sup>)**: calcd for C<sub>8</sub>H<sub>8</sub>BrNO<sub>2</sub> 228.9738, found 228.9732; **IR (KBr, cm<sup>-1</sup>)**: 3394, 2939, 1566 and 1435.

### 3-Hydroxy-5-methylbenzaldehyde *O*-methyl oxime (1e)

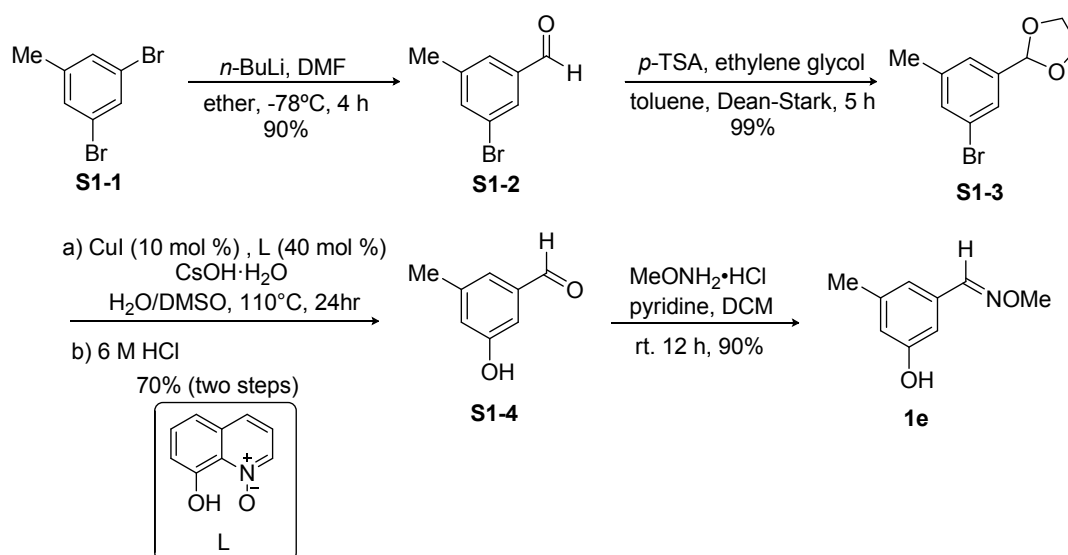

**Scheme S1.** Synthesis of 3-Hydroxy-5-methylbenzaldehyde *O*-methyl oxime (**1e**).

Compound **1e** was prepared starting from 3,5-dibromotoluene (**S1-1**), followed by formylation,<sup>3</sup> acetalization,<sup>4</sup> hydroxylation of the aryl bromide and hydrolysis to get 3-hydroxy-5-methylbenzaldehyde (**S1-4**).<sup>5</sup> Then, condensation with MeONH<sub>2</sub>·HCl to give oxime **1e**. (**Note: hydroxylation reaction does not work in the absence of acetal protection**)  $R_f$  = 0.67 (50% ethyl acetate in *n*-hexane); white solid; mp: 91-92 °C; **<sup>1</sup>H NMR (400 MHz, CDCl<sub>3</sub>)**:  $\delta$  = 7.95 (s, 1H), 6.92 (s, 1H), 6.87 (s, 1H), 6.66 (s, 1H), 3.94 (s, 3H), 2.29 (s, 3H); **<sup>13</sup>C NMR (100 MHz, CDCl<sub>3</sub>)**:  $\delta$  = 155.8, 148.5, 140.3, 133.4, 120.9, 117.8, 110.4, 62.0, 21.2; **HRMS (EI<sup>+</sup>)**: calcd for C<sub>9</sub>H<sub>11</sub>NO<sub>2</sub> 165.0790,



found 165.0789; IR (KBr,  $\text{cm}^{-1}$ ): 3232 and 1589.

### 3-Hydroxy-5-methoxybenzaldehyde *O*-methyl oxime (1f)

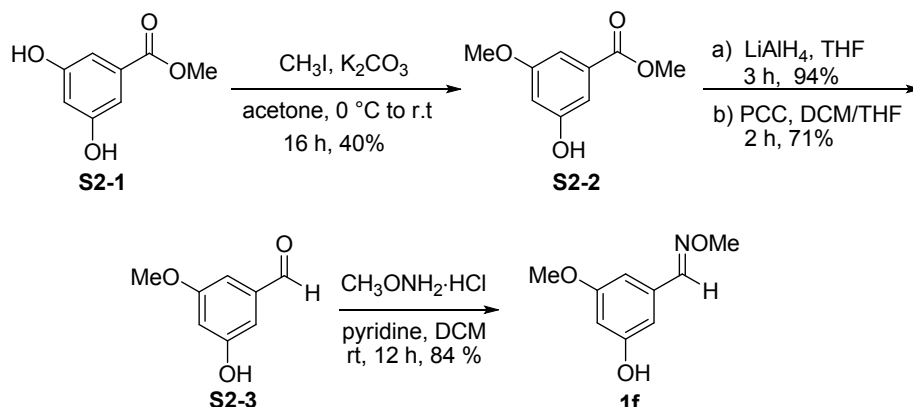

**Scheme S2.** Synthesis of 3-Hydroxy-5-methoxybenzaldehyde *O*-methyl oxime (**1f**)

Compound **1f** was prepared starting from methyl 3,5-dihydroxybenzoate (**S2-1**), followed by methylation,<sup>6</sup> reduction,<sup>7</sup> oxidation,<sup>8</sup> and condensation with  $\text{MeONH}_2\cdot\text{HCl}$  to give oxime **1f** (Scheme S2).  $R_f = 0.31$  (30% ethyl acetate in *n*-hexane); white solid; mp:  $92\text{--}94^\circ\text{C}$ ;  $^1\text{H NMR}$  (400 MHz,  $\text{CDCl}_3$ ):  $\delta = 7.93$  (s, 1H), 6.68–6.64 (m, 2H), 6.41 (m, 1H), 5.61 (s, OH), 3.94 (s, 3H), 3.77 (s, 3H);  $^{13}\text{C NMR}$  (100 MHz,  $\text{CDCl}_3$ ):  $\delta = 161.1, 156.9, 148.5, 134.1, 106.5, 105.1, 103.4, 62.1, 55.5$ ; HRMS ( $\text{EI}^+$ ): calcd for  $\text{C}_9\text{H}_{11}\text{NO}_3$  181.0739, found 181.0737; IR (KBr,  $\text{cm}^{-1}$ ): 2947 and 1589.

### 3-Bromo-5-hydroxybenzaldehyde *O*-methyl oxime (**1g**)

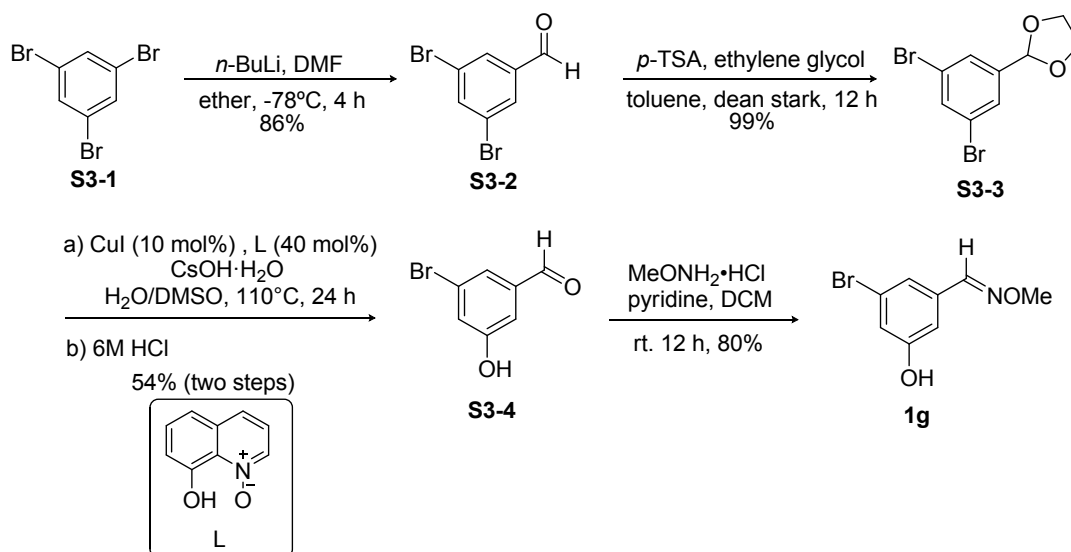

**Scheme S3.** Synthesis of 3-Bromo-5-hydroxybenzaldehyde *O*-methyl oxime (**1g**)

Compound **1g** was prepared starting from 1,3,5-dibromotoluene (**S3-1**), followed by formylation,<sup>3</sup> acetalization,<sup>4</sup> hydroxylation of aryl bromide and hydrolysis to get 3-hydroxy-5-methylbenzaldehyde (**S1-4**).<sup>5</sup> Then, condensation with MeONH<sub>2</sub>·HCl to give oxime **1g**. (Note: hydroxylation reaction does not work in the absence of acetal protection)  $R_f = 0.26$  (30% ethyl acetate in *n*-hexane); white solid; mp: 71-73 °C; <sup>1</sup>H NMR (400 MHz, CDCl<sub>3</sub>):  $\delta = 7.90$  (s, 1H), 7.25 (m, 1H), 7.00-6.98 (m, 2H), 5.47 (s, OH), 3.95 (s, 3H); <sup>13</sup>C NMR (100 MHz, CDCl<sub>3</sub>):  $\delta = 156.4, 146.8, 135.1, 123.1, 122.8, 120.0, 112.2, 62.3$ ; HRMS (EI<sup>+</sup>): calcd for C<sub>8</sub>H<sub>8</sub>BrNO<sub>2</sub> 405.0364, found 405.0364; IR (KBr, cm<sup>-1</sup>): 2353, 1566 and 1435.

#### 4-Fluoro-3-hydroxybenzaldehyde *O*-methyl oxime (**1h**)

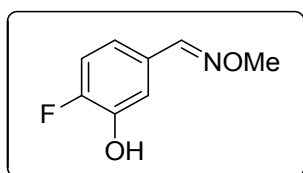

Compound **1h** was prepared from 4-fluoro-3-hydroxybenzaldehyde by following the synthetic procedure for **1a**;  $R_f = 0.70$  (50% ethyl acetate in *n*-hexane); white solid; mp: 77-79 °C; <sup>1</sup>H NMR (400 MHz, CDCl<sub>3</sub>):  $\delta = 7.95$  (s, 1H), 7.26-7.24 (m, 1H), 7.04 (m, 1H), 7.03 (m, 1H), 5.49 (brs, OH), 3.94 (s, 3H); <sup>13</sup>C NMR (100 MHz, CDCl<sub>3</sub>):  $\delta = 153.2, 150.8, 147.5, 143.9, 143.8, 129.3, 120.1, 120.1, 116.0, 115.8, 115.4, 62.1$ ; HRMS (EI<sup>+</sup>): calcd for C<sub>8</sub>H<sub>8</sub>FNO<sub>2</sub> 169.0539, found 169.0538; IR (KBr, cm<sup>-1</sup>): 3116, 1597, 1519 and 1435.

#### (3-Hydroxyphenyl)(phenyl)methanone *O*-methyl oxime (**1i**); mixture of *E* and *Z* isomers

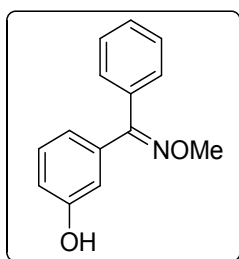

3-Hydroxybenzophenone (0.4 g, 2.0 mmol, 1.0 equiv) was added to a solution of MeONH<sub>2</sub>·HCl (0.17 g, 2.4 mmol, 1.2 equiv), and pyridine (0.63 g, 8.0 mmol, 4.0 equiv) in MeOH (4 mL). The solution was heated to reflux for 24 h, the reaction was then cooled to room temperature and concentrated in vacuo. The remaining residue was dissolved in CH<sub>2</sub>Cl<sub>2</sub> and filtered through a short pad of silica gel. The filtrate was purified by silica flash chromatography (*n*-hexane–EtOAc) to give the corresponding product as colorless oil (0.45 g, 99%);  $R_f = 0.67$  (50% ethyl acetate in *n*-hexane); <sup>1</sup>H NMR for mixture of *E* and *Z* isomers (400 MHz, CDCl<sub>3</sub>):  $\delta = 7.55$ -7.27 (m, 5H), 7.18 (t,  $J = 7.6$  Hz, 1H), 7.07-6.84 (m, 3H), 4.00 (s, 3H); <sup>13</sup>C NMR for mixture of *E* and *Z* isomers (100 MHz, CDCl<sub>3</sub>):  $\delta = 157.1, 157.0, 155.7, 155.6, 137.4, 135.8, 134.4, 132.9, 129.3, 129.0, 128.9, 128.1, 128.0, 127.7, 121.0, 120.3, 116.7, 116.1, 114.6$ ; HRMS (EI<sup>+</sup>): calcd for C<sub>14</sub>H<sub>13</sub>NO<sub>2</sub> 227.0946, found 227.0948; IR (KBr, cm<sup>-1</sup>): 3400, 2938 and 1589.

### 1-(3-Hydroxy-4-methoxyphenyl)ethanone *O*-methyl oxime (1j)

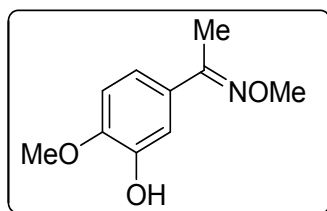

Compound **1j** was prepared from 3'-hydroxy-4'-methoxyacetophenone by following the synthetic procedure for **1i**;  $R_f = 0.58$  (50% ethyl acetate in *n*-hexane); colorless oil;  $^1\text{H NMR}$  (400 MHz,  $\text{CDCl}_3$ ):  $\delta = 7.26$  (d,  $J = 2.0$  Hz, 1H), 7.13 (dd,  $J = 8.4, 2.0$  Hz, 1H), 6.80 (d,  $J = 8.4$  Hz, 1H), 3.97 (s, 3H), 3.86 (s, 3H), 2.17 (s, 3H);  $^{13}\text{C NMR}$  (100 MHz,  $\text{CDCl}_3$ ):  $\delta = 154.1, 147.5, 145.4, 129.9, 118.1, 112.3, 110.2, 61.7, 55.8, 12.4$ ; HRMS ( $\text{EI}^+$ ): calcd for  $\text{C}_{10}\text{H}_{13}\text{NO}_3$  195.0895, found 195.0895; IR ( $\text{KBr}, \text{cm}^{-1}$ ): 3450, 2939 and 1619.

### 1-(3-Hydroxyphenyl)ethanone *O*-methyl oxime (1k)

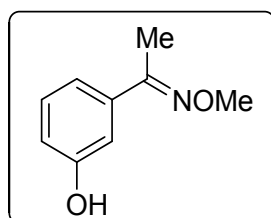

Compound **1k** was prepared from 3'-hydroxyacetophenone using the synthetic procedure of **1i**;  $R_f = 0.64$  (50% ethyl acetate in *n*-hexane); colorless oil;  $^1\text{H NMR}$  (400 MHz,  $\text{CDCl}_3$ ):  $\delta = 7.20$  (t,  $J = 8.0$  Hz, 1H), 7.14-7.11 (m, 2H), 6.88-6.77 (m, 1H), 3.98 (s, 3H), 2.19 (s, 3H);  $^{13}\text{C NMR}$  (100 MHz,  $\text{CDCl}_3$ ):  $\delta = 155.8, 155.4, 137.8, 129.7, 118.5, 116.5, 113.0, 61.8, 13.0$ ; HRMS ( $\text{EI}^+$ ): calcd for  $\text{C}_9\text{H}_{11}\text{NO}_2$  165.0790, found 165.0790; IR ( $\text{KBr}, \text{cm}^{-1}$ ): 3394, 2938 and 1581.

### 2-Hydroxyanthracene-9,10-dione *O,O*-dimethyl dioxime (**1l**; mixture of isomers)

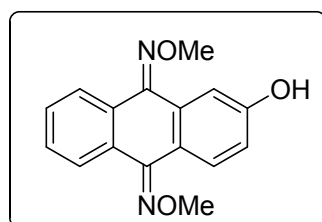

The solution containing 2-hydroxyanthraquinone (0.90 g, 4.0 mmol, 1.0 equiv), and  $\text{MeONH}_2 \cdot \text{HCl}$  (0.70 g, 10.0 mmol, 2.5 equiv) in pyridine (4 mL) as solvent, was heated to reflux for 24 h. The reaction was then cooled to room temperature and the mixture was dissolved in  $\text{CH}_2\text{Cl}_2$  (20 mL). The mixture was washed with  $\text{NH}_4\text{Cl}_{(\text{aq})}$  (10 mL) and organic layer was evaporated in vacuo. The residue was filtered through a short pad of silica gel and washed with  $\text{CH}_2\text{Cl}_2$ . The filtrate was purification by silica flash chromatography (hexane–EtOAc) to give the corresponding product as brown foam (0.53 g, 47%);  $R_f = 0.61$  (50% ethyl acetate in *n*-hexane);  $^1\text{H NMR}$  (400 MHz,  $\text{CDCl}_3$ ):  $\delta = 9.00$  (s, OH), 8.55-8.49 (m, 1H), 8.10-7.89 (m, 2H), 7.54-7.40 (m, 3H), 7.04-6.98 (m, 1H), 4.09-4.05 (m, 6H);  $^{13}\text{C NMR}$  (100 MHz,  $\text{CDCl}_3$ ):  $\delta = 159.2, 158.9, 158.6, 158.2, 149.4, 146.7, 146.6, 146.5, 146.3, 146.2, 136.2, 134.4, 134.2, 134.1, 132.9, 132.8, 132.4, 130.8, 130.7, 130.6, 130.4, 130.4, 130.3, 129.8, 129.7, 129.4, 129.2, 126.1, 125.6, 124.8, 124.6, 120.7, 119.3, 118.4, 117.8, 117.4, 117.2, 116.9, 116.7, 111.6, 110.6, 63.2, 63.1$ ;

**HRMS (EI<sup>+</sup>):** calcd for C<sub>16</sub>H<sub>14</sub>N<sub>2</sub>O<sub>3</sub> 282.1004, found 282.1003; **IR (KBr, cm<sup>-1</sup>):** 3300, 2938 and 1604.

### 2,6-Dihydroxyanthracene-9,10-dione *O,O*-dimethyl dioxime (1m)

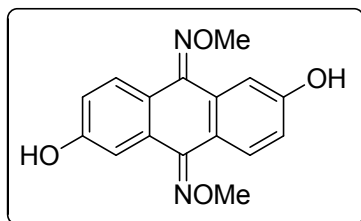

Followed the synthesis of **1i** and started from anthraflavic acid;  $R_f = 0.48$  (50% ethyl acetate in *n*-hexane); pale yellow solid; mp: 198-200 °C; **<sup>1</sup>H NMR (400 MHz, (CD<sub>3</sub>)<sub>2</sub>CO)** for the major isomer:  $\delta = 8.92$  (s, OH), 8.45 (d,  $J = 8.8$  Hz, 2H), 7.53 (d,  $J = 2.4$  Hz, 2H), 6.98-6.95 (m, 2H), 4.05 (s, 6H); **<sup>13</sup>C NMR (100 MHz, (CD<sub>3</sub>)<sub>2</sub>CO):**  $\delta = 158.7$ , 158.4, 158.1, 146.1, 145.9, 145.8, 136.1, 134.0, 132.4, 132.2, 130.2, 126.9, 126.3, 124.1, 120.4, 118.9, 117.7, 117.1, 117.0, 116.5, 116.0, 111.1, 110.0, 62.6; **HRMS (EI<sup>+</sup>):** calcd for C<sub>9</sub>H<sub>11</sub>NO<sub>3</sub> 298.0954, found 298.0952; **IR (KBr, cm<sup>-1</sup>):** 3355 and 1566.

### 6-Hydroxy-2,3-dihydro-1*H*-inden-1-one *O*-methyl oxime (1n)

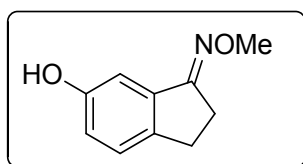

Compound **1n** was prepared from 6-hydroxy-1-indanone by following the synthetic procedure for **1i**;  $R_f = 0.26$  (50% ethyl acetate in *n*-hexane); yellow solid; mp: 172-175 °C; **<sup>1</sup>H NMR (400 MHz, CDCl<sub>3</sub>):**  $\delta = 7.16$  (d,  $J = 8.0$  Hz, 1H), 7.11 (d,  $J = 2.4$  Hz, 1H), 6.86 (dd,  $J = 8.0, 2.4$  Hz, 1H), 5.25 (s, OH), 3.97 (s, 3H), 2.96-2.86 (m, 4H); **<sup>13</sup>C NMR (100 MHz, CDCl<sub>3</sub>):**  $\delta = 162.8, 155.0, 140.6, 137.3, 126.4, 118.5, 107.2, 62.0, 27.8, 27.0$ ; **HRMS (EI<sup>+</sup>):** calcd for C<sub>10</sub>H<sub>11</sub>NO<sub>2</sub> 177.0790, found 177.0785; **IR (KBr, cm<sup>-1</sup>):** 3394, 2915 and 1604.

### 6-Hydroxy-2-phenyl-4*H*-chromen-4-one *O*-methyl oxime (1o)

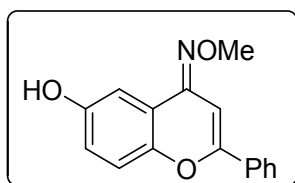

Followed the synthesis of **1i** and started from 6-hydroxyflavone;  $R_f = 0.47$  (50% ethyl acetate in *n*-hexane); yellow solid; mp: 153-156 °C; **<sup>1</sup>H NMR (400 MHz, CDCl<sub>3</sub>):**  $\delta = 7.84-7.83$  (m, 2H), 7.44-7.40 (m, 4H), 7.18 (d,  $J = 8.8$  Hz, 1H), 7.00 (s, 1H), 6.95 (dd,  $J = 8.8, 3.2$  Hz, 1H), 5.93 (s, OH), 3.98 (s, 3H); **<sup>13</sup>C NMR (100 MHz, CDCl<sub>3</sub>):**  $\delta = 155.4, 152.8, 146.3, 144.6, 132.8, 130.2, 128.6, 125.7, 119.2, 119.0, 118.5, 107.3, 92.9, 61.7$ ; **HRMS (EI<sup>+</sup>):** calcd for C<sub>16</sub>H<sub>13</sub>NO<sub>3</sub> 267.0895, found 267.0900; **IR (KBr, cm<sup>-1</sup>):** 3170 and 1627.

## Characterization data of Benzofuran Derivatives

### 7-Methoxy-2,3-diphenylbenzofuran-4-carbaldehyde *O*-methyl oxime (3aa)

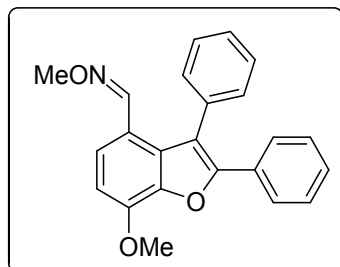

$R_f$  = 0.54 (20% ethyl acetate in *n*-hexane); yellow solid; mp: 140-143 °C;  $^1\text{H NMR}$  (400 MHz,  $\text{CDCl}_3$ ):  $\delta$  = 7.73 (d,  $J$  = 8.4 Hz, 1H), 7.70 (s, 1H), 7.59-7.26 (m, 10H), 6.85 (d,  $J$  = 8.4 Hz, 1H), 4.08 (s, 3H), 3.85 (s, 3H);  $^{13}\text{C NMR}$  (100 MHz,  $\text{CDCl}_3$ ):  $\delta$  = 151.4, 146.1, 145.2, 142.8, 133.4, 130.4, 130.0, 130.0, 129.3, 128.4, 128.3, 128.2, 126.6, 121.4, 118.0, 117.5, 107.1, 61.5, 56.1; **HRMS (EI<sup>+</sup>)**: calcd for  $\text{C}_{23}\text{H}_{19}\text{NO}_3$  357.1365, found 357.1365; **IR (KBr,  $\text{cm}^{-1}$ )**: 2938 and 1596.

### 7-Methoxy-2,3-di-*p*-tolylbenzofuran-4-carbaldehyde *O*-methyl oxime (3ab)

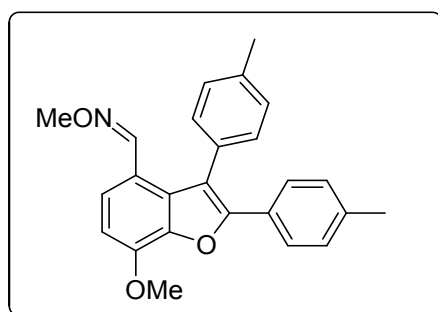

$R_f$  = 0.69 (30% ethyl acetate in *n*-hexane); white solid; mp: 143-145 °C;  $^1\text{H NMR}$  (400 MHz,  $\text{CDCl}_3$ ):  $\delta$  = 7.71 (s, 1H), 7.66 (d,  $J$  = 8.0 Hz, 1H), 7.40 (d,  $J$  = 8.4 Hz, 2H), 7.26 (s, 4H), 7.04 (d,  $J$  = 8.0 Hz, 2H), 6.81 (d,  $J$  = 8.4 Hz, 1H), 4.07 (s, 3H), 3.81 (s, 3H), 2.44 (s, 3H), 2.29 (s, 3H);  $^{13}\text{C NMR}$  (100 MHz,  $\text{CDCl}_3$ ):  $\delta$  = 151.8, 146.2, 145.6, 142.8, 138.4, 138.0, 130.4, 130.3, 130.0, 129.0, 127.4, 126.6, 121.3, 118.1, 116.9, 107.0, 61.6, 56.3, 21.5, 21.3; **HRMS (EI<sup>+</sup>)**: calcd for  $\text{C}_{25}\text{H}_{23}\text{NO}_3$  385.1678, found 385.1673; **IR (KBr,  $\text{cm}^{-1}$ )**: 2931, 2360, 1597 and 1512.

### 7-Methoxy-2,3-bis(4-methoxyphenyl)benzofuran-4-carbaldehyde *O*-methyl oxime (3ac)

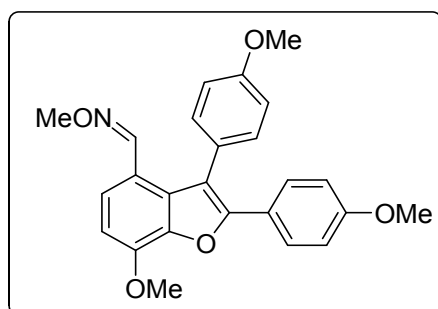

$R_f$  = 0.47 (30% ethyl acetate in *n*-hexane); white solid; mp: 141-143 °C;  $^1\text{H NMR}$  (400 MHz,  $\text{CDCl}_3$ ):  $\delta$  = 7.75 (s, 1H), 7.66 (d,  $J$  = 8.0 Hz, 1H), 7.46-7.44 (m, 2H), 7.30-7.28 (m, 2H), 7.00 (m, 2H), 6.80-6.76 (m, 3H), 4.06 (s, 3H), 3.88 (s, 3H), 3.81 (s, 3H), 3.76 (s, 3H);  $^{13}\text{C NMR}$  (100 MHz,  $\text{CDCl}_3$ ):  $\delta$  = 159.7, 159.6, 152.0, 146.2, 145.6, 131.7, 130.6, 128.2, 125.6, 123.0, 121.3, 118.0, 115.7, 114.8, 113.8, 106.9, 61.6, 56.3, 55.3, 55.2; **HRMS (EI<sup>+</sup>)**: calcd for  $\text{C}_{25}\text{H}_{23}\text{NO}_5$  417.1576, found 417.1578; **IR (KBr,  $\text{cm}^{-1}$ )**:

cm<sup>-1</sup>): 2939, 2839, 1612 and 1512.

**2,3-Bis(4-fluorophenyl)-7-methoxybenzofuran-4-carbaldehyde *O*-methyl oxime  
(3ad)**

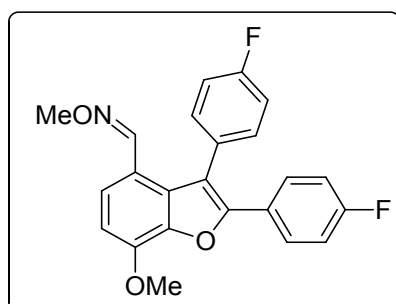

$R_f$  = 0.66 (30% ethyl acetate in *n*-hexane); pale yellow solid; mp: 142-144 °C; <sup>1</sup>H NMR (400 MHz, CDCl<sub>3</sub>):  $\delta$  = 7.67 (s, 1H), 7.66 (d,  $J$  = 8.6 Hz, 1H), 7.48-7.44 (m, 2H), 7.37-7.34 (m, 2H), 7.21-7.17 (m, 2H), 6.97-6.92 (m, 2H), 6.83 (d,  $J$  = 8.6 Hz, 1H), 4.06 (s, 3H), 3.80 (s, 3H); <sup>13</sup>C NMR (100 MHz, CDCl<sub>3</sub>):  $\delta$  = 164.1, 163.9, 161.6, 161.5, 151.1, 146.3, 145.1, 142.9, 132.3, 132.2, 129.8, 129.3, 128.8, 128.7, 126.2, 121.9, 118.1, 116.7, 116.5, 116.3, 115.7, 115.4, 107.3, 61.7, 56.3; HRMS (EI<sup>+</sup>): calcd for C<sub>23</sub>H<sub>17</sub>F<sub>2</sub>NO<sub>3</sub> 393.1176, found 393.1179; IR (KBr, cm<sup>-1</sup>): 2939, 2399, 1597 and 1512.

**2,3-Bis(4-chlorophenyl)-7-methoxybenzofuran-4-carbaldehyde *O*-methyl oxime  
(3ae)**

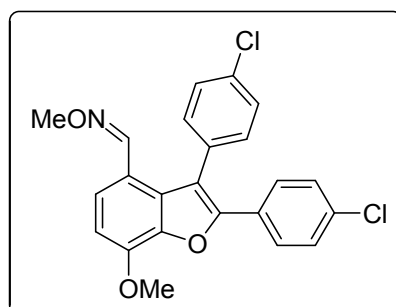

$R_f$  = 0.66 (30% ethyl acetate in *n*-hexane); yellow solid; mp: 125-128 °C; <sup>1</sup>H NMR (400 MHz, CDCl<sub>3</sub>):  $\delta$  = 7.69 (s, 1H), 7.65 (d,  $J$  = 8.4 Hz, 1H), 7.49-7.45 (m, 2H), 7.41-7.38 (m, 2H), 7.33-7.31 (m, 2H), 7.24-7.21 (m, 2H), 6.84 (d,  $J$  = 8.4 Hz, 1H), 4.06 (s, 3H), 3.80 (s, 3H); <sup>13</sup>C NMR (100 MHz, CDCl<sub>3</sub>):  $\delta$  = 150.8, 146.3, 145.1, 143.1, 134.7, 134.6, 132.8, 131.8, 129.8, 129.5, 128.8, 128.5, 128.3, 128.1, 122.1, 118.2, 116.9, 107.5, 61.7, 56.3; HRMS (EI<sup>+</sup>): calcd for C<sub>23</sub>H<sub>17</sub>Cl<sub>2</sub>NO<sub>3</sub> 425.0585, found 425.0586; IR (KBr, cm<sup>-1</sup>): 2931, 2399, 1728 and 1597.

**2,3-Bis(4-bromophenyl)-7-methoxybenzofuran-4-carbaldehyde *O*-methyl oxime (3af)**

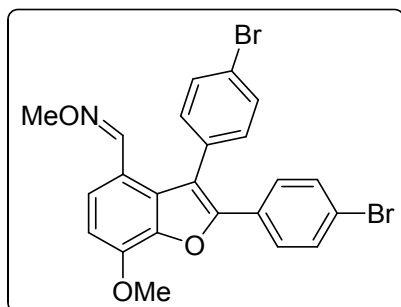

$R_f = 0.50$  (20% ethyl acetate in *n*-hexane); yellow solid; mp: 161-164 °C;  $^1\text{H NMR}$  (400 MHz,  $\text{CDCl}_3$ ):  $\delta = 7.72$  (s, 1H), 7.66 (d,  $J = 8.4$  Hz, 1H), 7.63 (d,  $J = 8.0$  Hz, 2H), 7.40 (d,  $J = 8.4$  Hz, 2H), 7.33 (d,  $J = 8.4$  Hz, 2H), 7.27 (d,  $J = 8.0$  Hz, 2H), 6.85 (d,  $J = 8.4$  Hz, 1H), 4.07 (s, 3H), 3.82 (s, 3H);  $^{13}\text{C NMR}$  (100 MHz,  $\text{CDCl}_3$ ):  $\delta = 150.8, 146.3, 145.0, 143.1, 132.7, 132.3, 132.1, 131.7, 129.3, 128.7, 128.2, 122.9, 122.1, 118.1, 117.0, 107.5, 61.7, 56.2$ ; **HRMS (EI<sup>+</sup>)**: calcd for  $\text{C}_{23}\text{H}_{17}\text{Br}_2\text{NO}_3$  512.9575, found 512.9561; **IR (KBr,  $\text{cm}^{-1}$ )**: 2931 and 1596.

**3ag (mixture of isomers)**

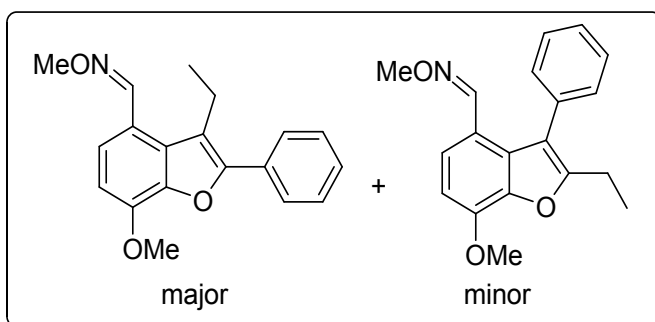

$R_f = 0.51$  (20% ethyl acetate in *n*-hexane); yellow solid; mp: 129-132 °C;  $^1\text{H NMR}$  for major isomer (400 MHz,  $\text{CDCl}_3$ ):  $\delta = 8.62$  (s, 1H), 7.74 (d,  $J = 7.2$  Hz, 2H), 7.65 (d,  $J = 8.4$  Hz, 1H), 7.50-7.38 (m, 3H), 6.82 (d,  $J = 8.4$  Hz, 1H), 4.04 (s, 3H), 4.01 (s, 3H), 2.98 (q,  $J = 7.2$  Hz, 2H), 1.35 (t,  $J = 7.2$  Hz, 3H);  $^{13}\text{C NMR}$  for major isomer (100 MHz,  $\text{CDCl}_3$ ):  $\delta = 146.8, 146.7, 146.0, 130.6, 129.5, 128.9, 128.8, 128.1, 127.9, 122.3, 121.5, 118.4, 107.0, 62.1, 56.4, 29.9, 20.2, 18.7, 15.4$ ; **HRMS (EI<sup>+</sup>)**: calcd for  $\text{C}_{19}\text{H}_{19}\text{NO}_3$  309.1365, found 309.1358; **IR (KBr,  $\text{cm}^{-1}$ )**: 2931 and 1604.

**7-Methoxy-2,3-dipropylbenzofuran-4-carbaldehyde *O*-methyl oxime (3ah)**

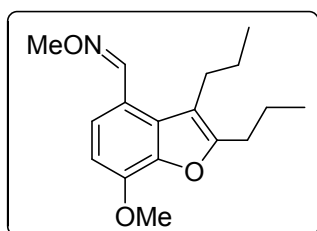

$R_f = 0.57$  (20% ethyl acetate in *n*-hexane); yellow solid; mp: 57-59 °C;  $^1\text{H NMR}$  (400 MHz,  $\text{CDCl}_3$ ):  $\delta = 8.49$  (s, 1H), 7.58 (d,  $J = 8.4$  Hz, 1H), 6.73 (d,  $J = 8.4$  Hz, 1H), 4.00 (s, 3H), 3.99 (s, 3H), 2.73-2.65 (m, 4H), 1.78-1.56 (m, 4H), 0.97 (t,  $J = 7.6$  Hz, 6H);  $^{13}\text{C NMR}$  (100 MHz,  $\text{CDCl}_3$ ):  $\delta = 156.2, 146.6, 146.1, 143.2, 128.9, 121.6, 117.4, 114.9, 105.6, 61.8, 56.0, 28.2, 26.8, 23.7, 21.8, 13.9, 13.8$ ; **HRMS (EI<sup>+</sup>)**: calcd for  $\text{C}_{17}\text{H}_{23}\text{NO}_3$  289.1678, found 289.1683; **IR (KBr,  $\text{cm}^{-1}$ )**: 2962 and 1596.

### 6-Methoxy-3,4,8,9-tetrapropylfuro[2,3-*h*]isoquinoline (3ah')

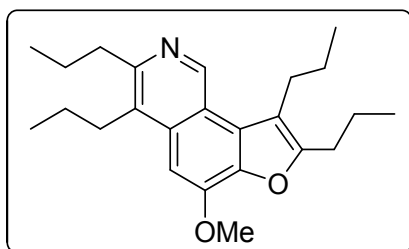

$R_f = 0.41$  (20% ethyl acetate in *n*-hexane); brown solid; mp: 78-81 °C;  $^1\text{H NMR}$  (400 MHz,  $\text{CDCl}_3$ ):  $\delta = 9.35$  (s, 1H), 7.02 (s, 1H), 4.13 (s, 3H), 3.01-2.85 (m, 6H), 2.78 (t,  $J = 7.6$  Hz, 2H), 1.83-1.67 (m, 8H), 1.11-0.95 (m, 12H);  $^{13}\text{C NMR}$  (100 MHz,  $\text{CDCl}_3$ ):  $\delta = 155.8, 151.9, 148.4, 144.2, 142.5, 134.7, 128.2, 124.9, 118.3, 116.7, 96.8, 55.7, 37.6, 30.7, 28.2, 27.4, 23.7, 23.5, 23.1, 22.1, 14.7, 14.4, 14.0, 13.8$ ; **HRMS (EI<sup>+</sup>)**: calcd for  $\text{C}_{24}\text{H}_{33}\text{NO}_2$  367.2511, found 367.2510; **IR (KBr,  $\text{cm}^{-1}$ )**: 3178 and 1612.

### 7-Methoxy-2,3-bis(methoxymethyl)benzofuran-4-carbaldehyde *O*-methyl oxime (3ai)

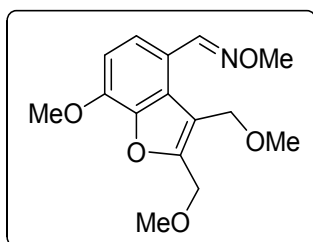

$R_f = 0.30$  (30% ethyl acetate in *n*-hexane); yellow solid; mp: 110-112 °C;  $^1\text{H NMR}$  (400 MHz,  $\text{CDCl}_3$ ):  $\delta = 9.18$  (s, 1H), 7.64 (d,  $J = 8.0$  Hz, 1H), 6.65 (d,  $J = 8.0$  Hz, 1H), 4.67 (s, 2H), 4.35 (s, 2H), 4.12 (s, 3H), 3.89 (s, 3H), 3.47 (s, 3H), 3.34 (s, 3H);  $^{13}\text{C NMR}$  (100 MHz,  $\text{CDCl}_3$ ):  $\delta = 154.3, 151.6, 141.0, 140.5, 132.3, 126.9, 121.6, 121.0, 66.9, 63.8, 63.5, 58.2, 57.9, 56.1$ ; **HRMS (EI<sup>+</sup>)**: calcd for  $\text{C}_{15}\text{H}_{19}\text{NO}_5$  293.1263, found 293.1260; **IR (KBr,  $\text{cm}^{-1}$ )**: 2924, 2854, 1589 and 1458.

### 2,3-Diphenylbenzofuran-4-carbaldehyde *O*-methyl oxime (3ba)

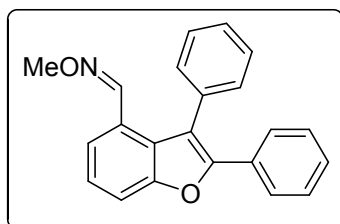

$R_f = 0.54$  (20% ethyl acetate in *n*-hexane); yellow solid; mp: 115-118 °C;  $^1\text{H NMR}$  (400 MHz,  $\text{CDCl}_3$ ):  $\delta = 7.75$  (d,  $J = 7.6$  Hz, 1H), 7.74 (s, 1H), 7.59-7.27 (m, 12H), 3.86 (s, 3H);  $^{13}\text{C NMR}$  (100 MHz,  $\text{CDCl}_3$ ):  $\delta = 154.0, 151.4, 145.5, 133.7, 130.4, 130.2, 129.4, 128.5, 128.4$  (2C), 126.6, 125.7, 124.6, 120.4, 117.3, 112.1, 61.8; **HRMS (EI<sup>+</sup>)**: calcd for  $\text{C}_{22}\text{H}_{17}\text{NO}_2$  327.1259, found 327.1266; **IR (KBr,  $\text{cm}^{-1}$ )**: 2938 and 1596.



### 6,7-Dimethoxy-2,3-diphenylbenzofuran-4-carbaldehyde *O*-methyl oxime (3ca)

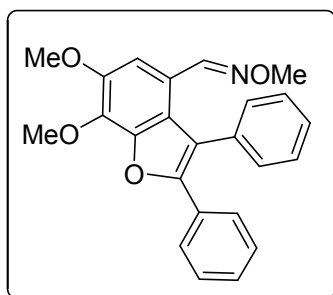

$R_f = 0.59$  (30% ethyl acetate in *n*-hexane); orange solid; mp: 112-114 °C;  $^1\text{H NMR}$  (400 MHz,  $\text{CDCl}_3$ ):  $\delta = 7.60$  (s, 1H), 7.50-7.44 (m, 5H), 7.41-7.38 (m, 3H), 7.24-7.21 (m, 3H), 4.30 (s, 3H), 3.95 (s, 3H), 3.80 (s, 3H);  $^{13}\text{C NMR}$  (100 MHz,  $\text{CDCl}_3$ ):  $\delta = 151.1, 148.9, 145.5, 145.1, 135.6, 133.6, 130.4, 130.2, 129.5, 128.6, 128.4, 128.3, 126.3, 125.5, 118.5, 117.3, 105.8, 61.8, 61.0, 57.0$ ; **HRMS (EI<sup>+</sup>)**: calcd for  $\text{C}_{24}\text{H}_{21}\text{NO}_4$  387.1471, found 387.1470; **IR (KBr,  $\text{cm}^{-1}$ )**: 2939, 1604, 1512 and 1250.

### 3da (with 60% debromination product)

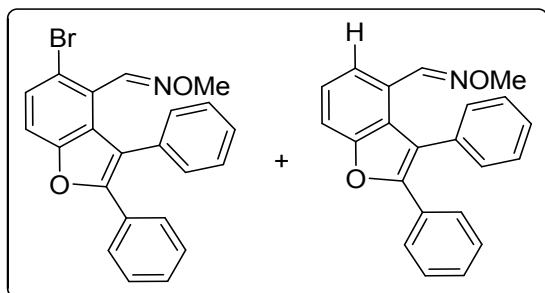

$R_f = 0.54$  (20 % ethyl acetate in *n*-hexane);  $^1\text{H NMR}$  (400 MHz,  $\text{CDCl}_3$ ):  $\delta = 7.98$  (s, 1H), 7.52-7.23 (m, 12H), 3.40 (s, 3H);  $^{13}\text{C NMR}$  (100 MHz,  $\text{CDCl}_3$ ):  $\delta = 153.2, 153.0, 145.5, 133.5, 130.7, 130.1, 129.9, 128.7, 128.4, 127.7, 127.2, 125.2, 117.9, 117.8, 113.1, 61.6$ ; **HRMS (EI<sup>+</sup>)**: calcd for  $\text{C}_{22}\text{H}_{16}\text{BrNO}_2$  405.0364, found 405.0358; **IR (KBr,  $\text{cm}^{-1}$ )**: 3055, 2938 and 1604.

### 6-Methyl-2,3-diphenylbenzofuran-4-carbaldehyde *O*-methyl oxime (3ea)

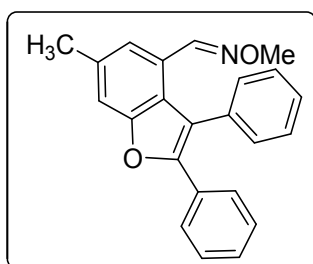

$R_f = 0.85$  (50% ethyl acetate in *n*-hexane); pale yellow solid; mp: 111-113 °C;  $^1\text{H NMR}$  (400 MHz,  $\text{CDCl}_3$ ):  $\delta = 7.69$  (s, 1H), 7.56 (s, 1H), 7.50-7.47 (m, 5H), 7.41-7.39 (m, 2H), 7.37 (s, 1H), 7.25-7.22 (m, 3H), 3.83 (s, 3H), 2.48 (s, 3H);  $^{13}\text{C NMR}$  (100 MHz,  $\text{CDCl}_3$ ):  $\delta = 154.5, 150.8, 145.7, 135.1, 133.9, 130.4, 129.4, 128.4, 128.2, 126.5, 125.0, 121.4, 117.3, 112.6, 61.8, 21.6$ ; **HRMS (EI<sup>+</sup>)**: calcd for  $\text{C}_{23}\text{H}_{19}\text{NO}_2$  341.1416, found 341.1416; **IR (KBr,  $\text{cm}^{-1}$ )**: 2939 and 1604.

### 6-Methoxy-2,3-diphenylbenzofuran-4-carbaldehyde *O*-methyl oxime (3fa)

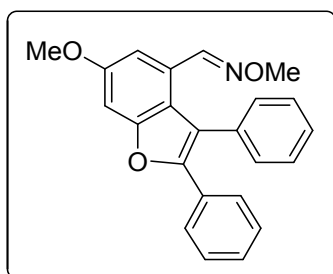

$R_f$  = 0.68 (30% Ethyl acetate in *n*-hexane); white solid; mp: 100-102 °C;  $^1\text{H NMR}$  (400 MHz,  $\text{CDCl}_3$ ):  $\delta$  = 7.68 (s, 1H), 7.51-7.46 (m, 5H), 7.43-7.40 (m, 2H), 7.38 (d,  $J$  = 2.4 Hz, 1H), 7.26-7.23 (m, 3H), 7.13 (d,  $J$  = 2.4 Hz, 1H), 3.90 (s, 3H), 3.84 (s, 3H);  $^{13}\text{C NMR}$  (100 MHz,  $\text{CDCl}_3$ ):  $\delta$  = 157.9, 155.1, 150.5, 145.1, 133.8, 130.4, 130.3, 129.3, 128.4, 128.3, 127.9, 126.2, 125.6, 122.9, 117.1, 107.3, 98.0, 61.9, 55.9; **HRMS** ( $\text{EI}^+$ ): calcd for  $\text{C}_{23}\text{H}_{19}\text{NO}_3$  357.1365, found 357.1363; **IR** ( $\text{KBr}$ ,  $\text{cm}^{-1}$ ): 3062, 2939 and 1620.

### 6-Bromo-2,3-diphenylbenzofuran-4-carbaldehyde *O*-methyl oxime (3ga)

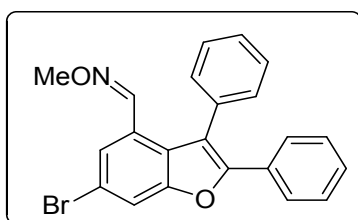

$R_f$  = 0.81 (30% ethyl acetate in *n*-hexane); white solid; mp: 112-115 °C;  $^1\text{H NMR}$  (400 MHz,  $\text{CDCl}_3$ ):  $\delta$  = 7.87 (d,  $J$  = 1.6 Hz, 1H), 7.69 (d,  $J$  = 1.6 Hz, 1H), 7.60 (s, 1H), 7.51-7.46 (m, 5H), 7.39-7.37 (m, 2H), 7.26-7.24 (m, 3H), 3.83 (s, 3H);  $^{13}\text{C NMR}$  (100 MHz,  $\text{CDCl}_3$ ):  $\delta$  = 154.3, 152.0, 144.1, 133.1, 130.4, 129.8, 129.5, 128.7, 128.5, 127.8, 126.7, 123.3, 118.0, 117.2, 115.2, 62.1; **HRMS** ( $\text{EI}^+$ ): calcd for  $\text{C}_{22}\text{H}_{16}\text{BrNO}_2$  405.0364, found 405.0364; **IR** ( $\text{KBr}$ ,  $\text{cm}^{-1}$ ): 2276, 1736 and 1604.

### 7-Fluoro-2,3-diphenylbenzofuran-4-carbaldehyde *O*-methyl oxime (3ha)

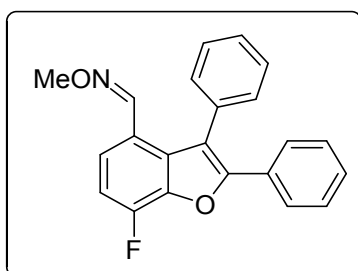

$R_f$  = 0.82 (30% ethyl acetate in *n*-hexane); yellow solid; mp: 160-162 °C;  $^1\text{H NMR}$  (400 MHz,  $\text{CDCl}_3$ ):  $\delta$  = 7.66 (quart,  $J$  = 4.4 Hz, 1H), 7.60 (s, 1H), 7.53-7.47 (m, 5H), 7.41-7.38 (m, 2H), 7.28-7.25 (m, 3H), 7.04 (m, 1H), 3.80 (s, 3H);  $^{13}\text{C NMR}$  (100 MHz,  $\text{CDCl}_3$ ):  $\delta$  = 152.4, 149.8, 147.3, 144.7, 141.0, 132.9, 131.9, 130.4, 129.7, 129.5, 128.9, 128.8, 128.5, 126.8, 121.7, 121.4, 121.3, 117.7, 111.4, 111.3, 61.9; **HRMS** ( $\text{EI}^+$ ): calcd for  $\text{C}_{22}\text{H}_{16}\text{FNO}_2$  345.1165, found 345.1162; **IR** ( $\text{KBr}$ ,  $\text{cm}^{-1}$ ): 2337, 1581 and 1396.

**(2,3-Diphenylbenzofuran-4-yl)(phenyl)methanone *O*-methyl oxime (3ia)**

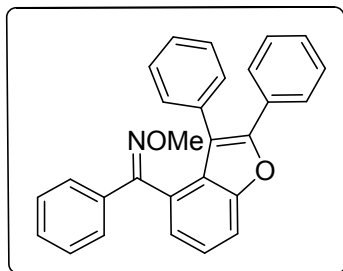

$R_f = 0.63$  (20% ethyl acetate in *n*-hexane); white solid; mp: 128-131 °C;  $^1\text{H NMR}$  (400 MHz,  $\text{CDCl}_3$ ):  $\delta = 7.63$  (d,  $J = 8.0$  Hz, 1H), 7.48-7.11 (m, 17H), 3.76 (s, 3H);  $^{13}\text{C NMR}$  (100 MHz,  $\text{CDCl}_3$ ):  $\delta = 154.3, 154.0, 151.5, 133.3, 133.1, 130.9, 130.4, 130.3, 129.9, 128.8, 128.4, 128.3, 128.2, 127.5, 127.1, 127.0, 125.6, 124.2, 117.9, 111.7, 62.1$ ; **HRMS (EI<sup>+</sup>)**: calcd for  $\text{C}_{28}\text{H}_{21}\text{NO}_2$  403.1572, found 403.1563; **IR (KBr,  $\text{cm}^{-1}$ )**: 2931 and 1604.

**1-(7-Methoxy-2,3-diphenylbenzofuran-4-yl)ethanone *O*-methyl oxime (3ja)**

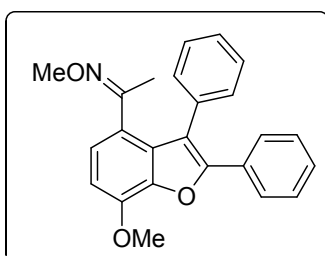

$R_f = 0.49$  (20% ethyl acetate in *n*-hexane); white solid; mp: 129-131 °C;  $^1\text{H NMR}$  (400 MHz,  $\text{CDCl}_3$ ):  $\delta = 7.58$ -7.25 (m, 10H), 7.07 (d,  $J = 8.0$  Hz, 1H), 6.83 (d,  $J = 8.0$  Hz, 1H), 4.07 (s, 3H), 3.72 (s, 3H), 1.53 (s, 3H);  $^{13}\text{C NMR}$  (100 MHz,  $\text{CDCl}_3$ ):  $\delta = 155.6, 151.4, 145.7, 143.5, 133.4, 130.6, 130.4, 129.0, 128.5, 128.3, 128.2, 127.6, 127.2, 124.3, 124.0, 117.9, 106.5, 61.4, 56.3, 16.8$ ; **HRMS (EI<sup>+</sup>)**: calcd for  $\text{C}_{24}\text{H}_{21}\text{NO}_3$  371.1521, found 371.1511; **IR (KBr,  $\text{cm}^{-1}$ )**: 2931 and 1619.

**1-(2,3-Diphenylbenzofuran-4-yl)ethanone *O*-methyl oxime (3ka)**

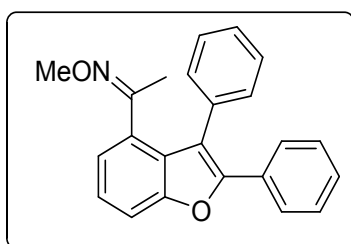

$R_f = 0.64$  (20% ethyl acetate in *n*-hexane); colorless oil;  $^1\text{H NMR}$  (400 MHz,  $\text{CDCl}_3$ ):  $\delta = 7.59$ -7.54 (m, 3H), 7.43-7.27 (m, 9H), 7.13 (d,  $J = 7.2$  Hz, 1H), 3.72 (s, 3H), 1.59 (s, 3H);  $^{13}\text{C NMR}$  (100 MHz,  $\text{CDCl}_3$ ):  $\delta = 155.6, 154.3, 133.6, 131.8, 130.6, 130.5, 128.5, 128.3, 127.6, 127.5, 127.0, 124.4, 123.2, 117.6, 111.5, 61.5, 16.7$ ; **HRMS (EI<sup>+</sup>)**: calcd for  $\text{C}_{23}\text{H}_{19}\text{NO}_2$  341.1416, found 341.1407; **IR (KBr,  $\text{cm}^{-1}$ )**: 2931 and 1604.

**1,2-Diphenylanthra[2,1-*b*]furan-6,11-dione *O,O*-dimethyl dioxime (3la; mixture of isomers)**

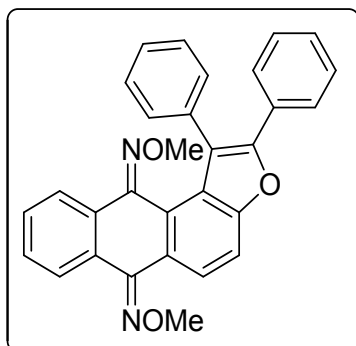

$R_f = 0.51$  (20% ethyl acetate in *n*-hexane); pale yellow oil;  $^1\text{H NMR}$  for major isomer (400 MHz,  $\text{CDCl}_3$ ):  $\delta = 8.60$  (t,  $J = 8.8$  Hz, 1H), 8.02 (d,  $J = 8.8$  Hz, 1H), 7.67-7.26 (m, 14H), 4.17 (s, 3H), 3.28 (s, 3H);  $^{13}\text{C NMR}$  (100 MHz,  $\text{CDCl}_3$ ):  $\delta = 155.3, 155.1, 152.8, 147.2, 147.0, 145.0, 144.9, 134.9, 134.8, 134.2, 131.5, 130.5, 130.4, 130.3$  (2C), 130.0, 129.8, 129.5, 129.2, 128.7, 128.6, 128.5, 128.4, 128.2, 128.1, 128.0, 127.7, 127.6, 127.0, 126.9, 126.7, 126.3, 124.9, 124.8, 124.2, 121.4, 118.5, 118.4, 112.0, 110.9, 63.0, 62.9, 62.09, 62.04; **HRMS (EI<sup>+</sup>)**: calcd for  $\text{C}_{30}\text{H}_{22}\text{N}_2\text{O}_3$  458.1630, found 458.1629; **IR (KBr,  $\text{cm}^{-1}$ )**: 2931 and 1565.

**1,2,7,8-Tetraphenylanthra[2,1-*b*:6,5-*b'*]difuran-6,12-dione *O,O*-dimethyl dioxime (3ma)**

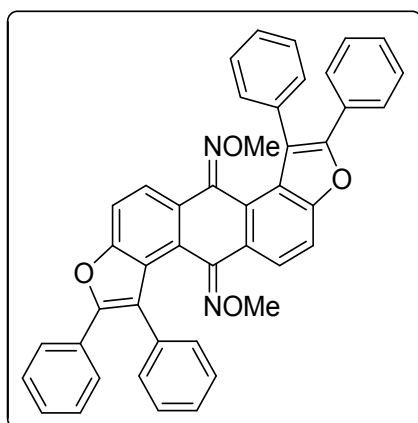

$R_f = 0.43$  (20% ethyl acetate in *n*-hexane); yellow solid; mp: 311-314 °C;  $^1\text{H NMR}$  (400 MHz,  $\text{CDCl}_3$ ):  $\delta = 8.03$  (d,  $J = 8.4$  Hz, 2H), 7.62 (d,  $J = 8.4$  Hz, 2H), 7.54-7.29 (m, 20H), 3.28 (s, 6H);  $^{13}\text{C NMR}$  (100 MHz,  $\text{CDCl}_3$ ):  $\delta = 154.9, 152.7, 145.2, 134.8, 130.5, 130.4, 128.9, 128.4, 128.3, 128.2, 127.7, 127.1, 125.3, 125.0, 118.4, 110.5, 62.1$ ; **HRMS (EI<sup>+</sup>)**: calcd for  $\text{C}_{44}\text{H}_{30}\text{N}_2\text{O}_4$  650.2206, found 650.2215; **IR (KBr,  $\text{cm}^{-1}$ )**: 2933 and 1573.

**1,2-Diphenyl-6*H*-indeno[5,4-*b*]furan-8(7*H*)-one *O*-methyl oxime (3na)**

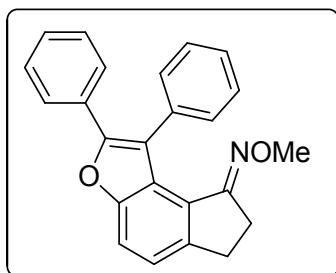

$R_f = 0.66$  (20% ethyl acetate in *n*-hexane); yellow solid; mp: 150-153 °C;  $^1\text{H NMR}$  (400 MHz,  $\text{CDCl}_3$ ):  $\delta = 7.56$ -7.51 (m, 4H), 7.43-7.42 (m, 4H), 7.27-7.22 (m, 4H), 3.31 (s, 3H), 3.08 (t,  $J = 6.4$  Hz, 2H), 2.85-2.82 (m, 2H);  $^{13}\text{C NMR}$  (100 MHz,  $\text{CDCl}_3$ ):  $\delta = 162.2, 153.7, 144.2, 135.3, 131.4, 130.7, 129.2, 128.2, 128.1, 127.9, 127.3, 126.8, 125.3, 125.1, 121.2, 118.9, 112.8, 61.4, 28.8, 26.3$ ; **HRMS (EI<sup>+</sup>)**: calcd for  $\text{C}_{24}\text{H}_{19}\text{NO}_2$  353.1416, found 353.1417; **IR (KBr,  $\text{cm}^{-1}$ )**: 2931 and 1604.

### 1,2,7-Triphenyl-9*H*-furo[3,2-*f*]chromen-9-one *O*-methyl oxime (3oa)

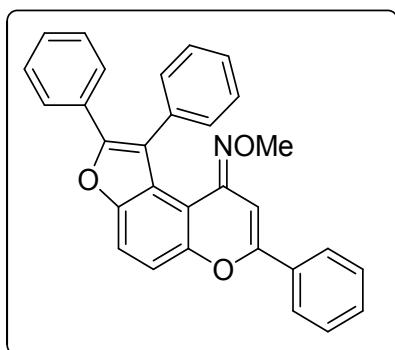

$R_f$  = 0.68 (20% ethyl acetate in *n*-hexane); white solid; mp: 199-202 °C;  $^1\text{H NMR}$  (400 MHz,  $\text{CDCl}_3$ ):  $\delta$  = 7.89-7.87 (m, 2H), 7.64 (d,  $J$  = 8.8 Hz, 1H), 7.47-7.34 (m, 10H), 7.31 (d,  $J$  = 8.4 Hz, 1H), 7.26-7.25 (m, 3H), 7.02 (s, 1H), 3.16 (s, 3H);  $^{13}\text{C NMR}$  (100 MHz,  $\text{CDCl}_3$ ):  $\delta$  = 153.8, 153.7, 151.5, 149.8, 143.1, 136.7, 132.7, 130.8, 129.9, 128.5, 128.2, 128.1, 127.8, 127.7, 127.5, 126.8, 125.4, 124.9, 123.6, 114.7, 113.3, 112.4, 93.8, 60.7; **HRMS** ( $\text{EI}^+$ ): calcd for  $\text{C}_{30}\text{H}_{21}\text{NO}_3$  443.1521, found 443.1520; **IR** ( $\text{KBr}$ ,  $\text{cm}^{-1}$ ): 2931 and 1643.

### 6-Methoxy-8,9-diphenyl-3,4-dipropylfuro[2,3-*h*]isoquinoline (4)

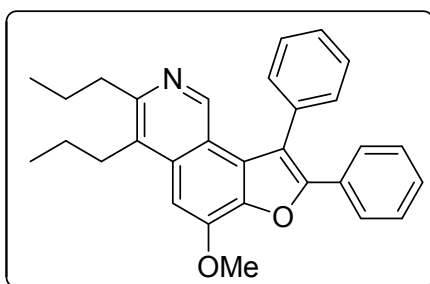

$R_f$  = 0.23 (20 % ethyl acetate in *n*-hexane); yellow solid; mp: 155-158 °C;  $^1\text{H NMR}$  (400 MHz,  $\text{CDCl}_3$ ):  $\delta$  = 8.65 (s, 1H), 7.59-7.50 (m, 7H), 7.28-7.24 (m, 3H), 7.14 (s, 1H), 4.19 (s, 3H), 3.03-2.86 (m, 4H), 1.77-1.70 (m, 4H), 1.12 (t,  $J$  = 7.2 Hz, 3H), 1.01 (t,  $J$  = 7.2 Hz, 3H);  $^{13}\text{C NMR}$  (100 MHz,  $\text{CDCl}_3$ ):  $\delta$  = 152.5, 151.4, 148.4, 144.2, 142.5, 135.0, 133.8, 130.3, 129.7, 128.5, 128.4, 128.2, 128.1, 126.4, 126.2, 119.3, 118.1, 55.9, 37.6, 30.7, 23.7, 23.6, 14.7, 14.4; **HRMS** ( $\text{EI}^+$ ): calcd for  $\text{C}_{30}\text{H}_{29}\text{NO}_2$  435.2198, found 435.2196; **IR** ( $\text{KBr}$ ,  $\text{cm}^{-1}$ ): 2962 and 1612.

# NOE and NOESY spectra of 3ag

## NOE spectra of compound 3ag

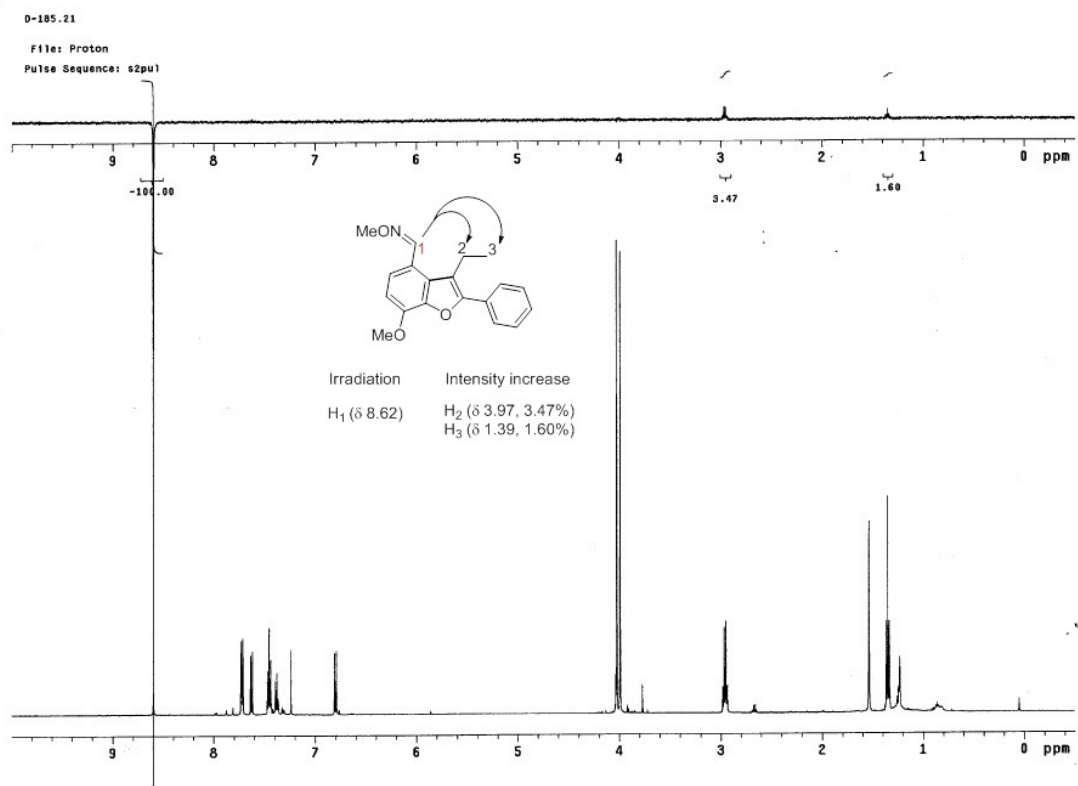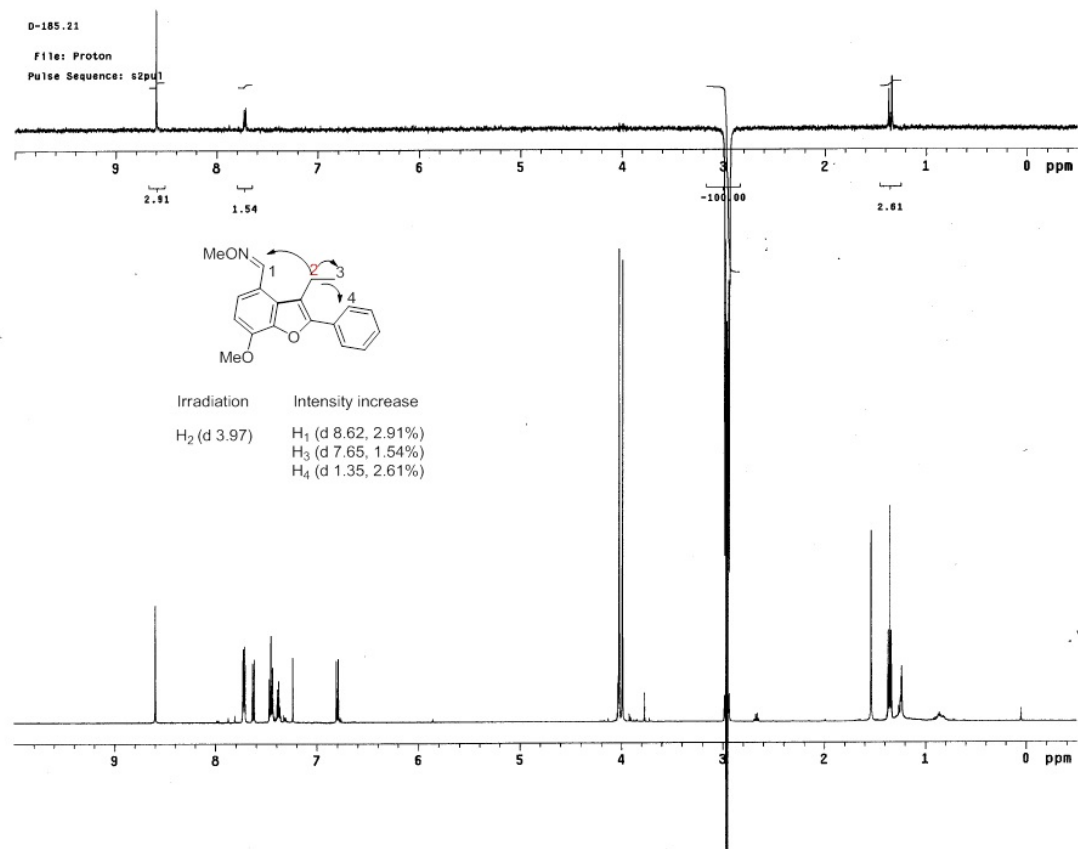

# NOESY spectra of compound **3ag**

D-185.21  
ghane0319.002noesy  
File: qane0319.002noesy  
Pulse Sequence: NOESY

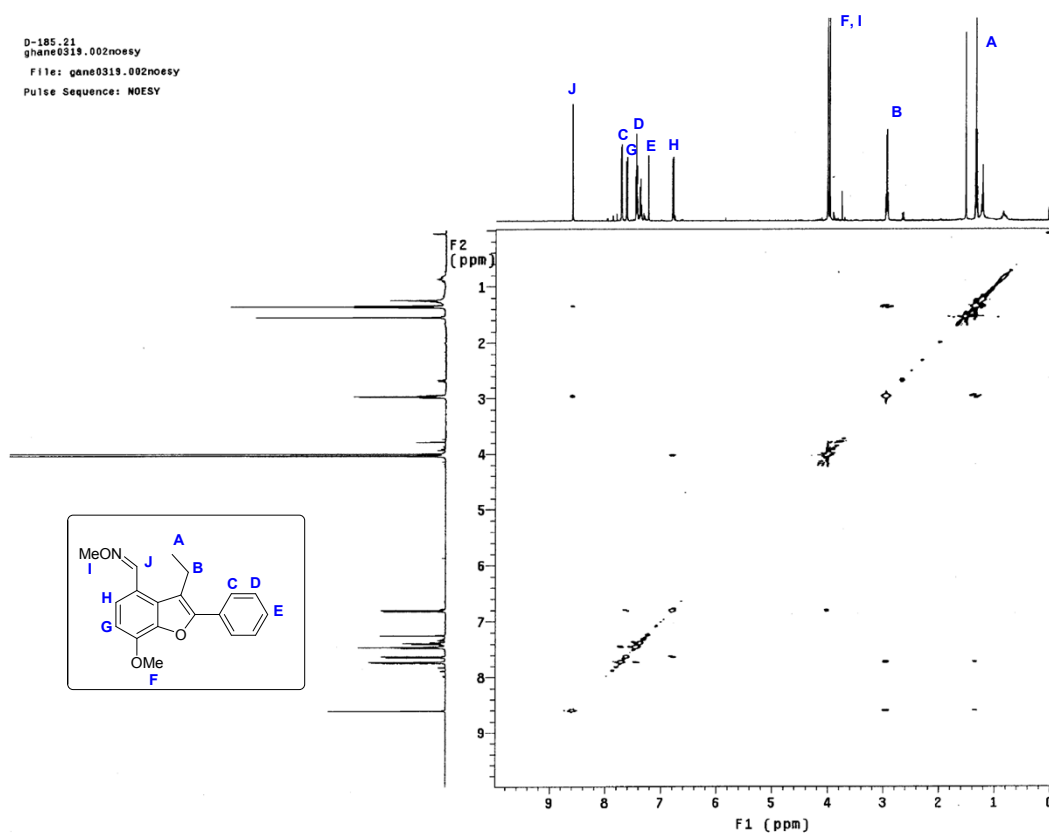

## References

1. Dubost, E.; Fossey, C.; Cailly, T.; Rault, S.; Fabis, F. *J. Org. Chem.* **2011**, *76*, 6414-6420.
2. Léo, P.-M.; Morin, C.; Philouze, C. *Org. Lett.* **2002**, *4*, 2711-2714.
3. Laughrey, Z. R.; Gibb, C. L. D.; Senechal, T.; Gibb, B. C. *Chem. Eur. J.* **2003**, *9*, 130-139.
4. Lin, Y.-D.; Chien, C.-T.; Lin, S.-Y.; Chang, H.-H.; Liu, C.-Y.; Chow, T. J. *J. Photochem. Photobiol. A* **2011**, *222*, 192-202.
5. Yang, K.; Li, Z.; Wang, Z.; Yao, Z.; Jiang, S. *Org. Lett.* **2011**, *13*, 4340-4343.
6. Nawrat, C. C.; Palmer, L. I.; Blake, A. J.; Moody, C. J. *J. Org. Chem.* **2013**, *78*, 5597-5603.
7. Shioe, K.; Sahara, Y.; Horino, Y.; Harayama, T.; Takeuchi, Y.; Abe, H. *Tetrahedron* **2011**, *67*, 1960-1970.
8. Jain, A. K.; Reddy, V. V.; Paul, A.; Muniyappa, K.; Bhattacharya, S. *Biochemistry* **2009**, *48*, 10693-10702.



# 1H and 13C NMR Spectra

<sup>1</sup>H and <sup>13</sup>C spectra of compound 1a

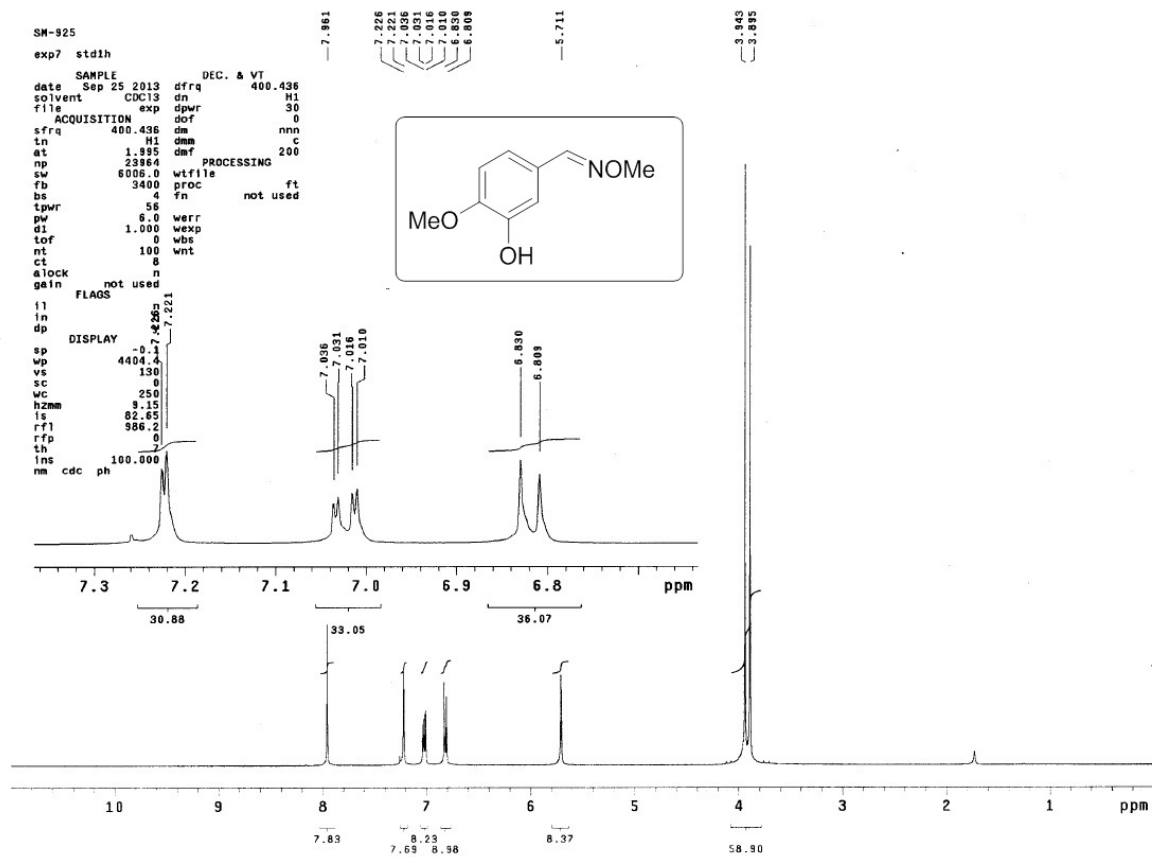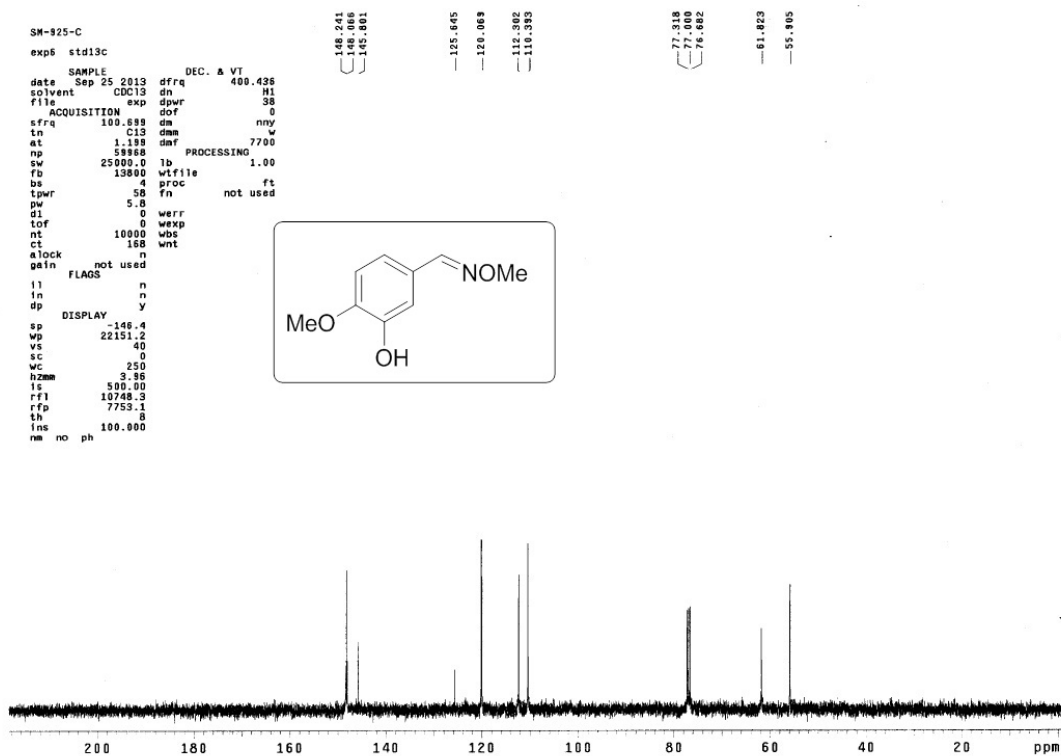

$^1\text{H}$  and  $^{13}\text{C}$  spectra of compound **1b**

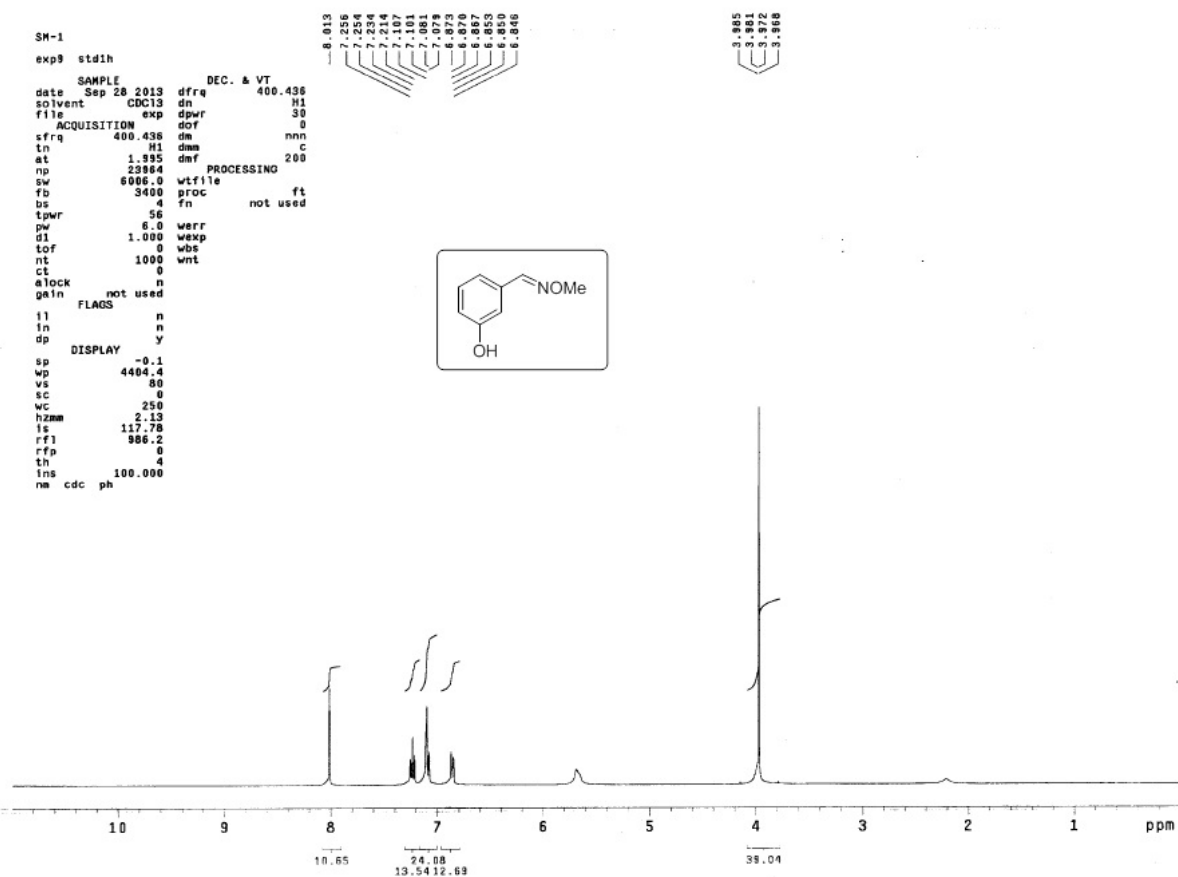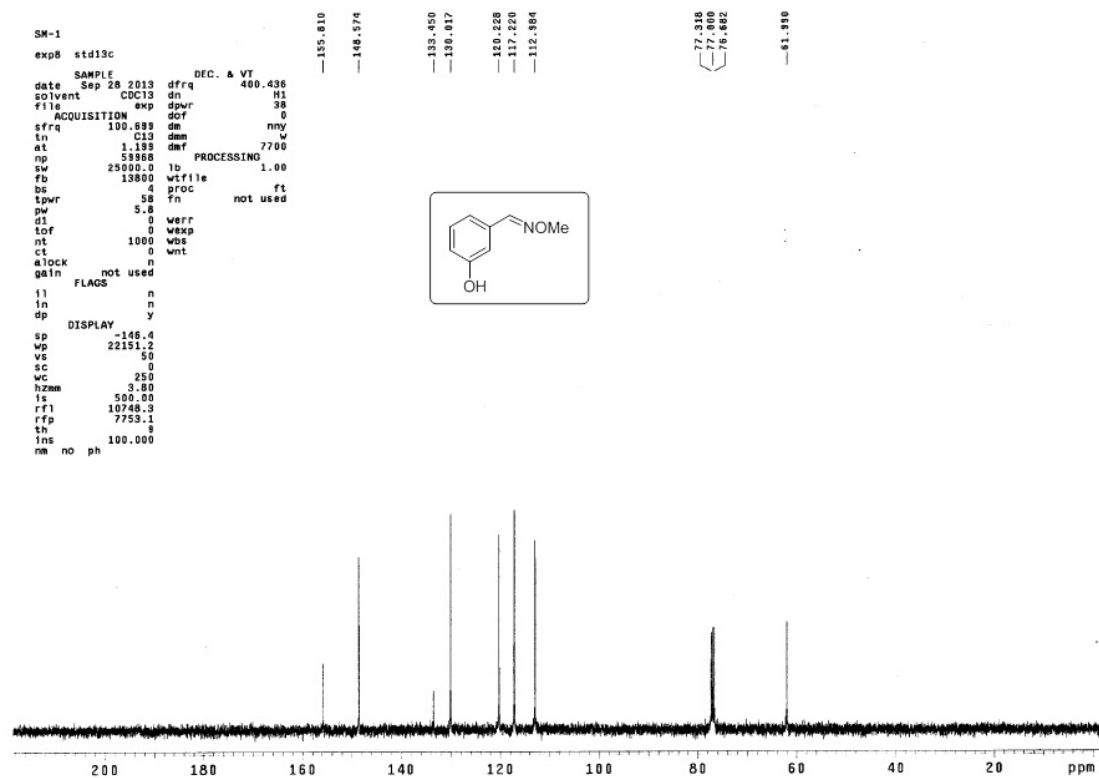

# <sup>1</sup>H and <sup>13</sup>C spectra of compound 1c

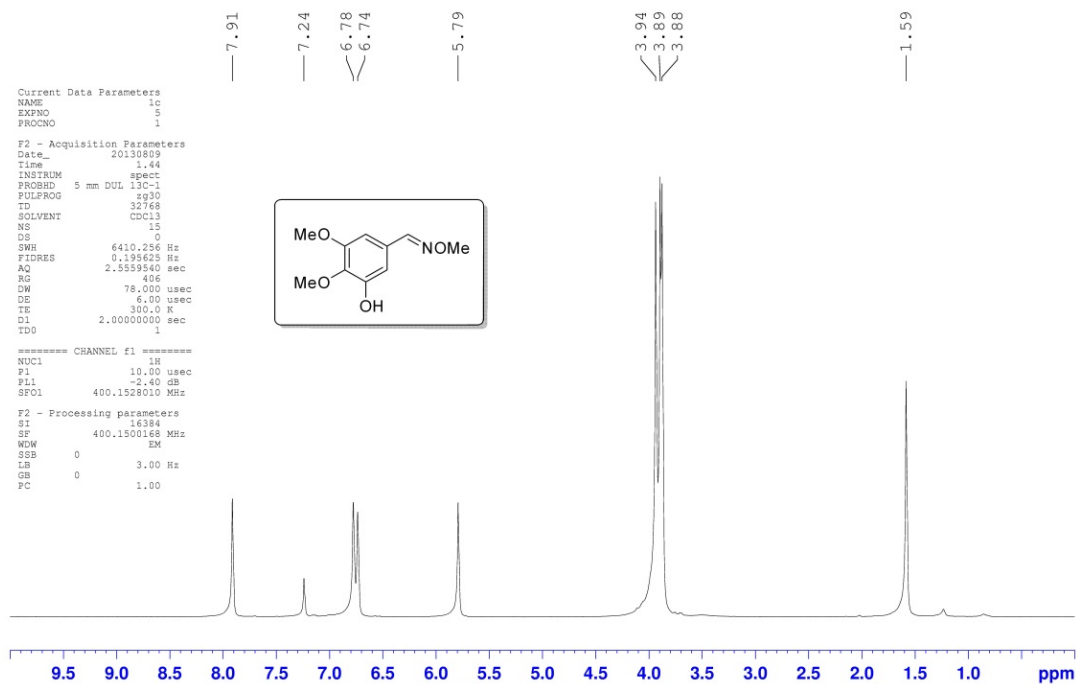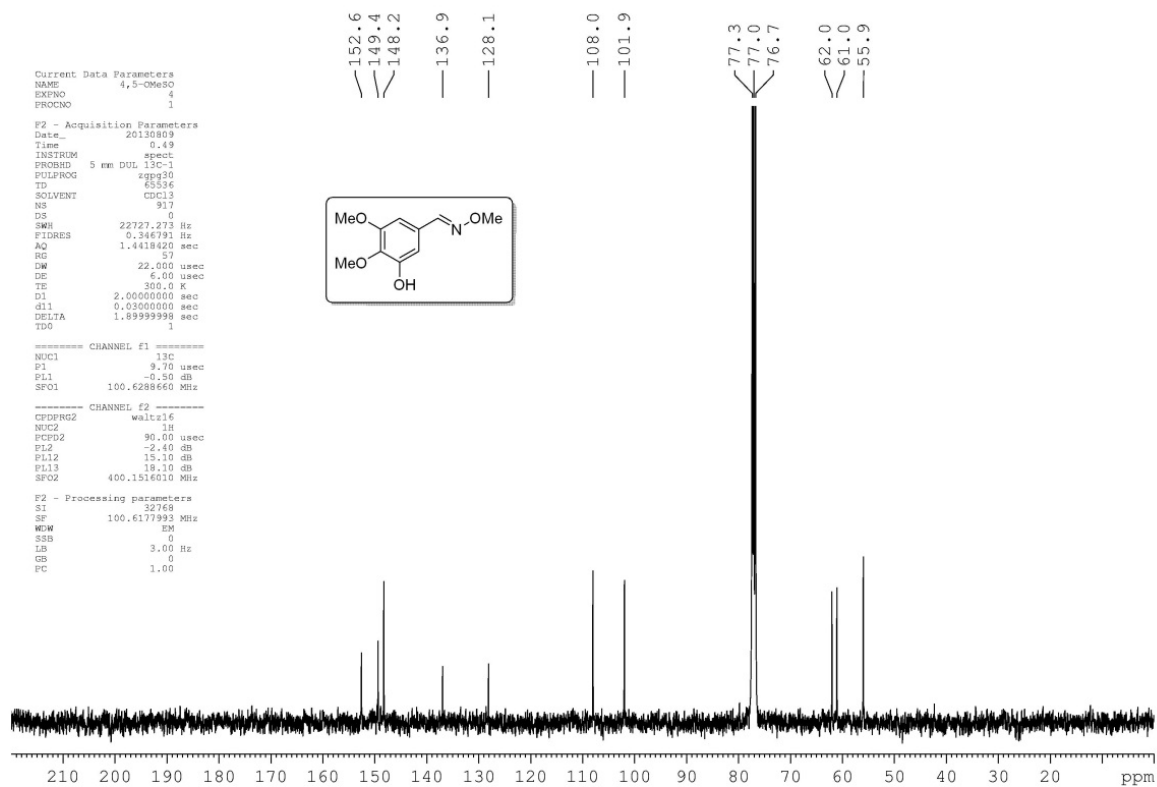

<sup>1</sup>H and <sup>13</sup>C spectra of compound 1d

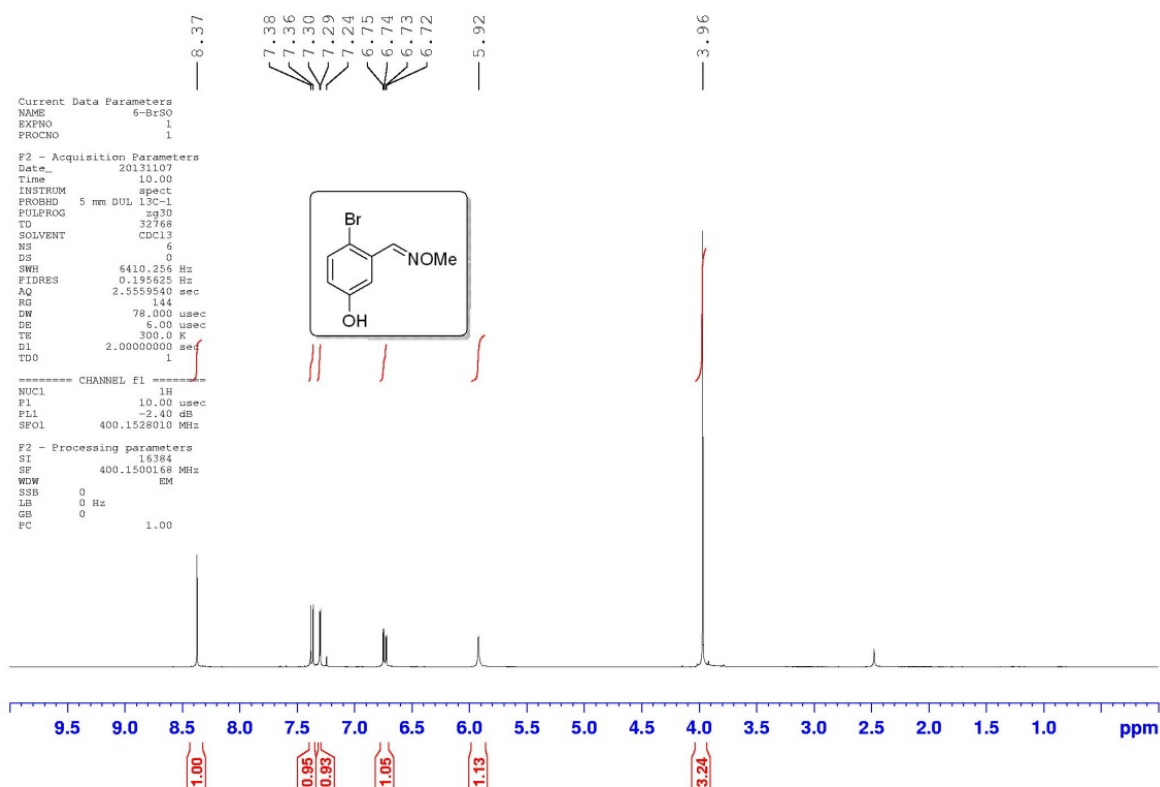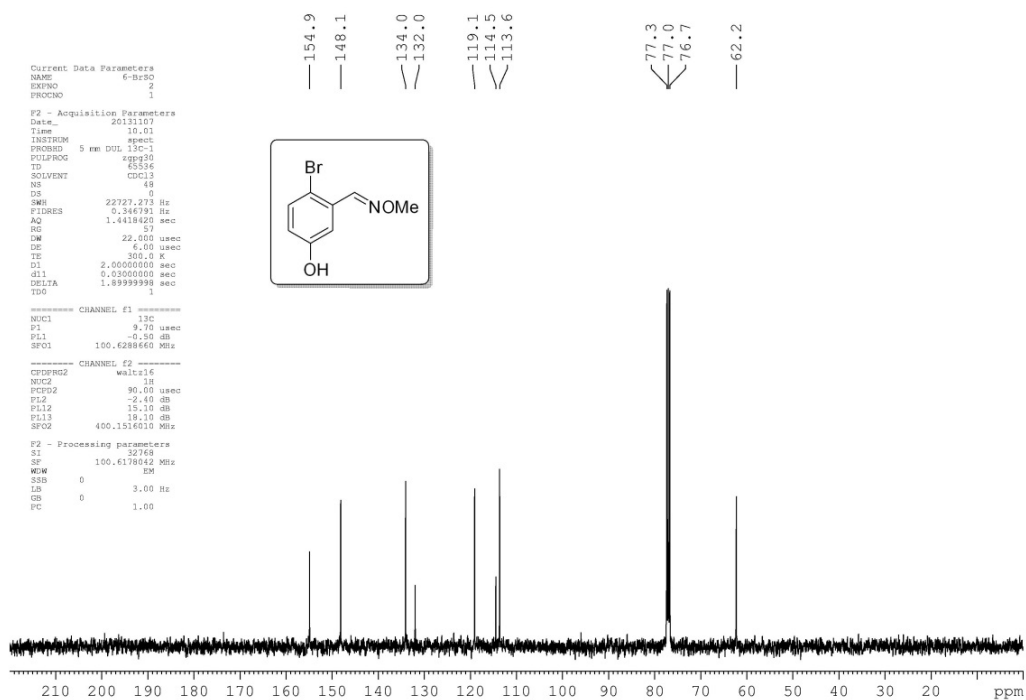

# <sup>1</sup>H and <sup>13</sup>C spectra of compound 1e

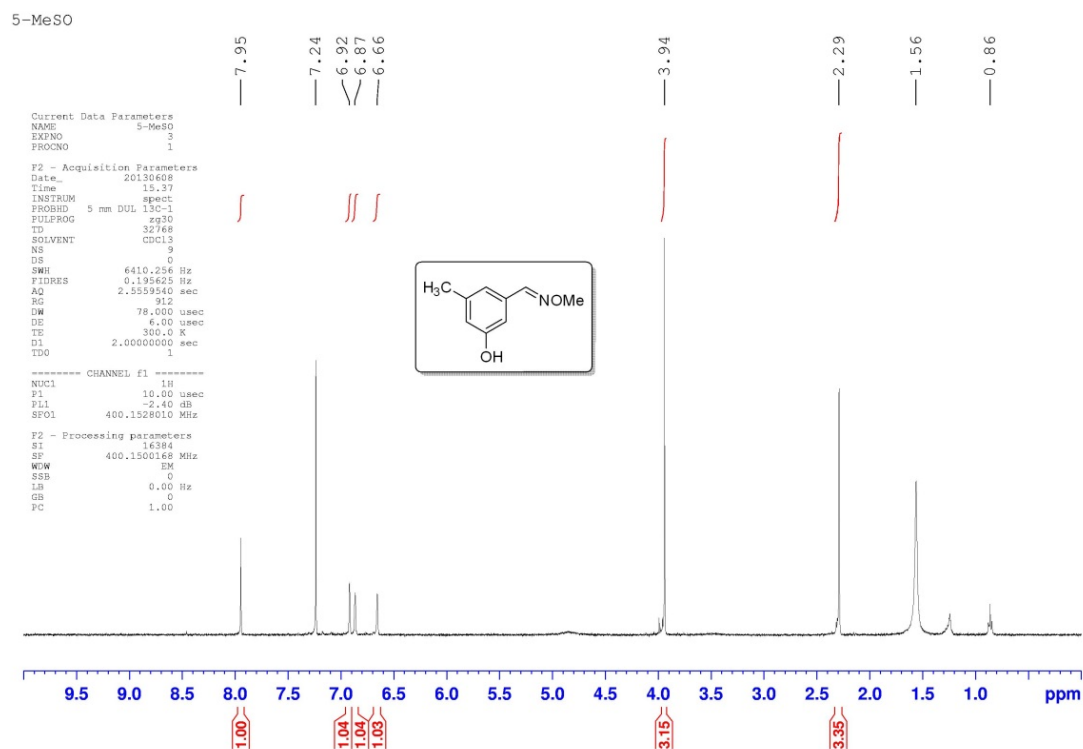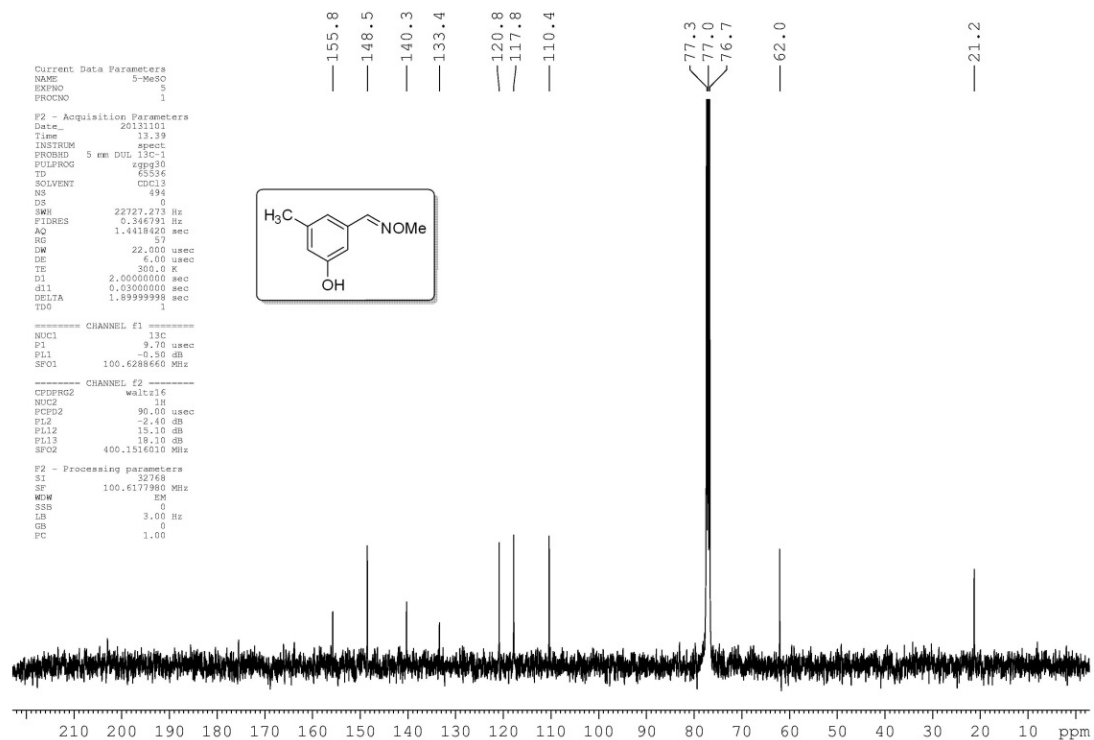

# <sup>1</sup>H and <sup>13</sup>C spectra of compound 1f

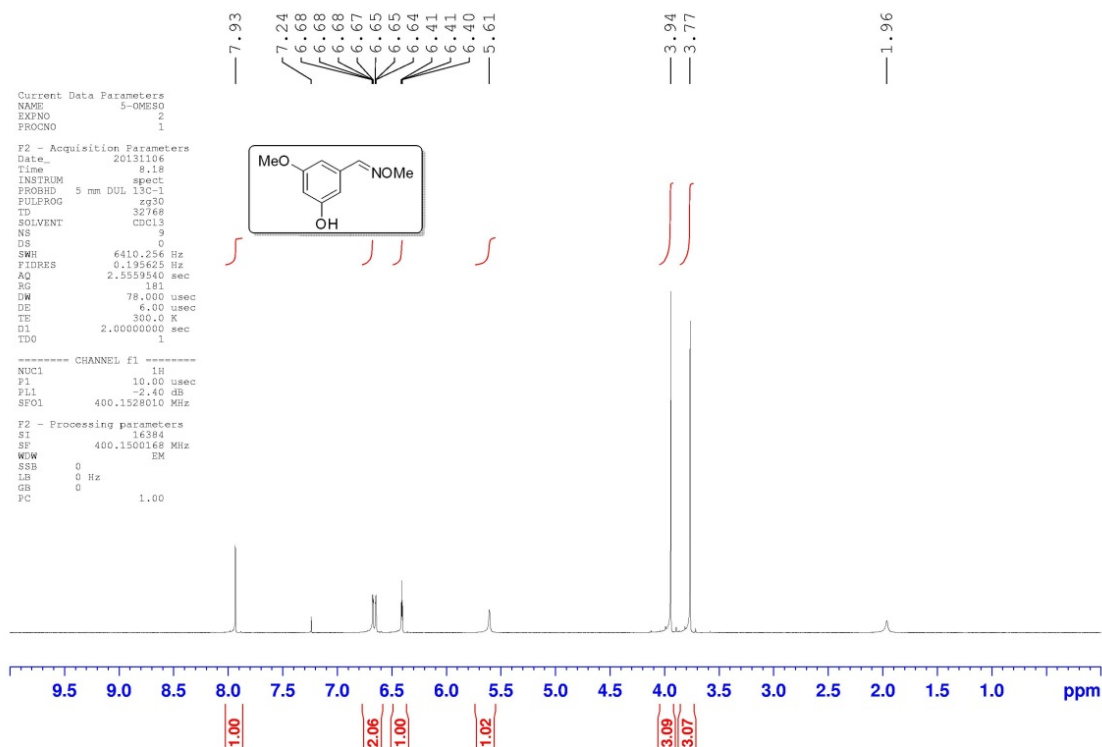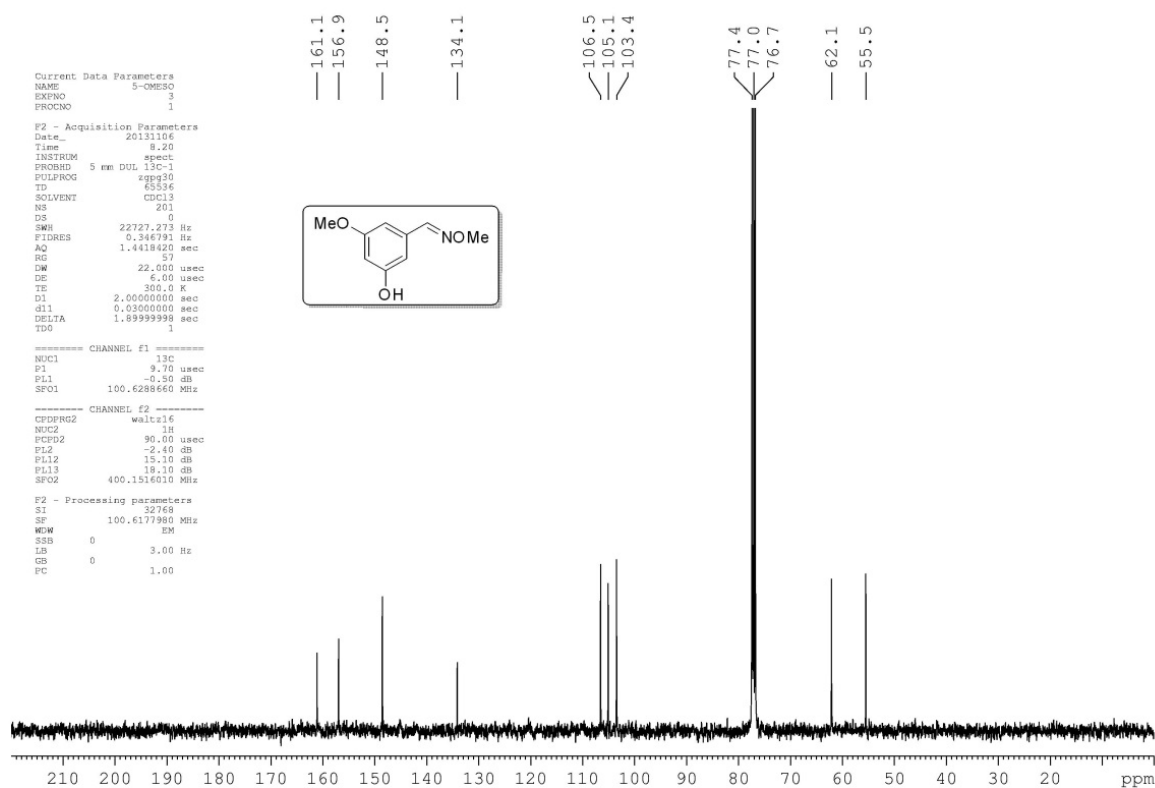

# $^1\text{H}$ and $^{13}\text{C}$ spectra of compound **1g**

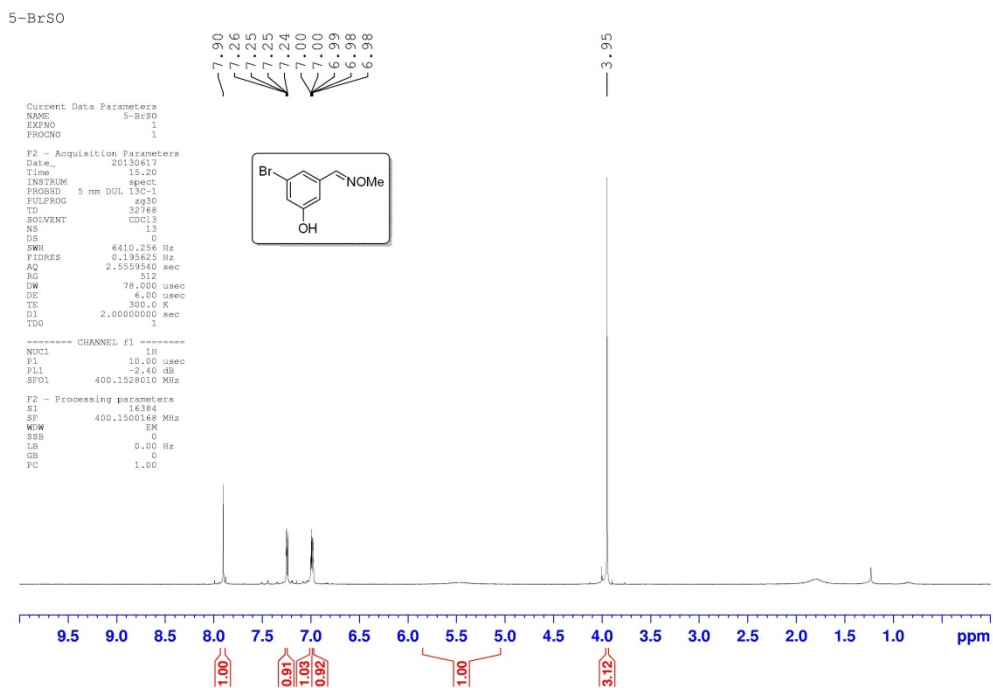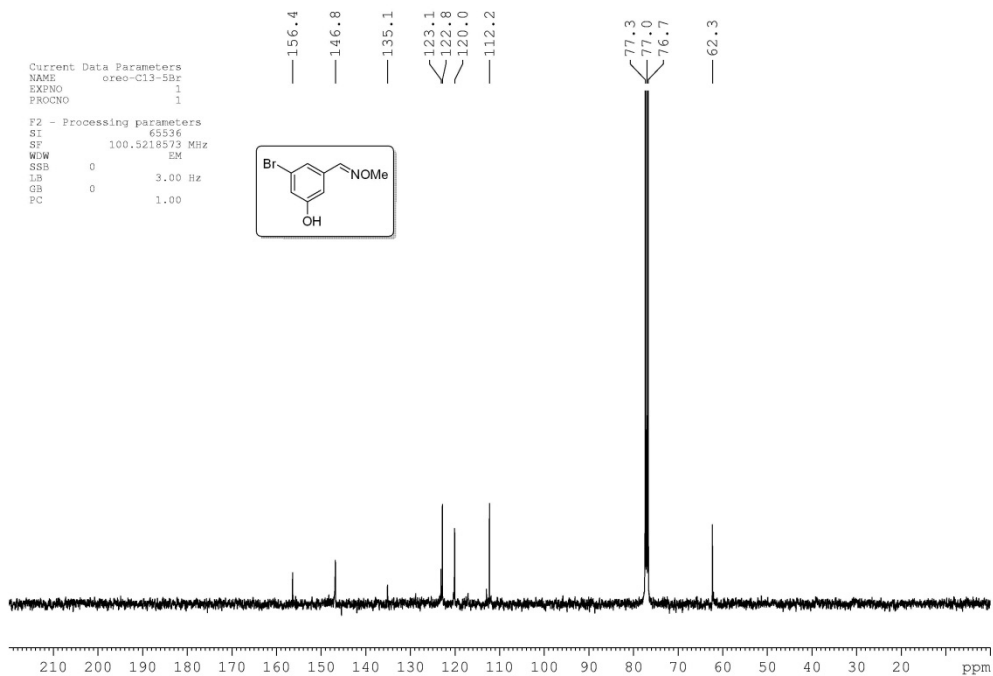

# <sup>1</sup>H and <sup>13</sup>C spectra of compound 1h

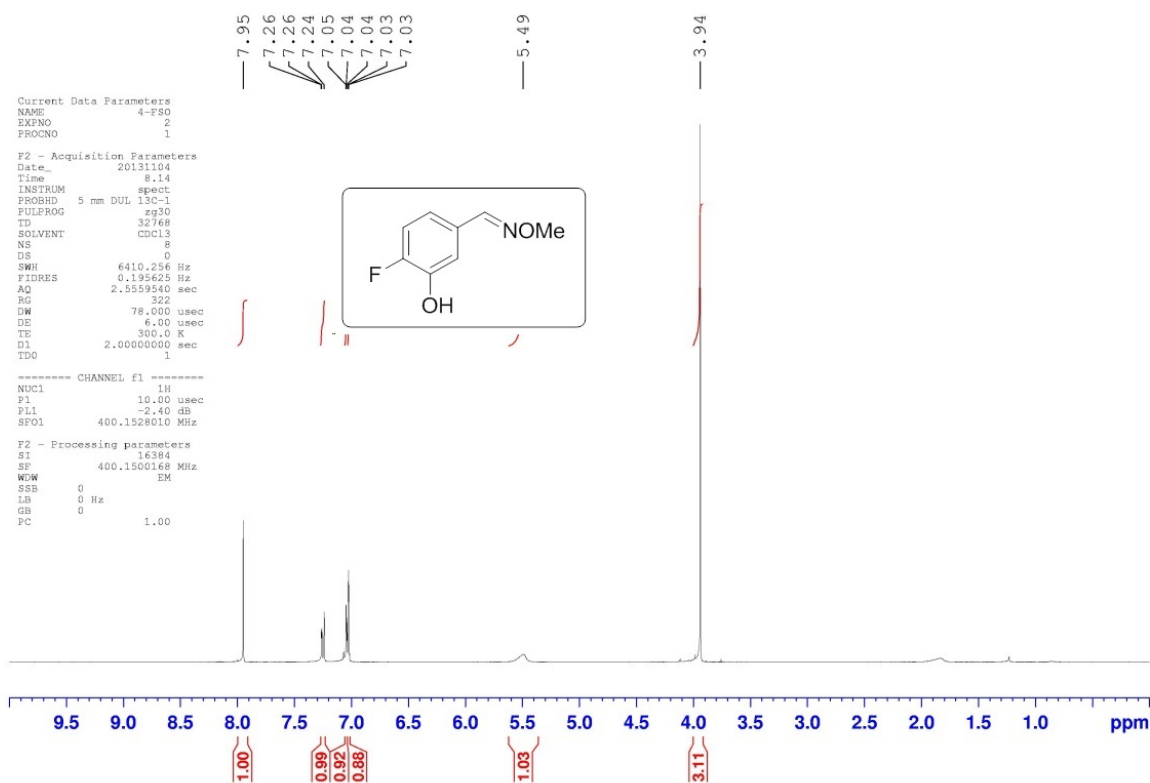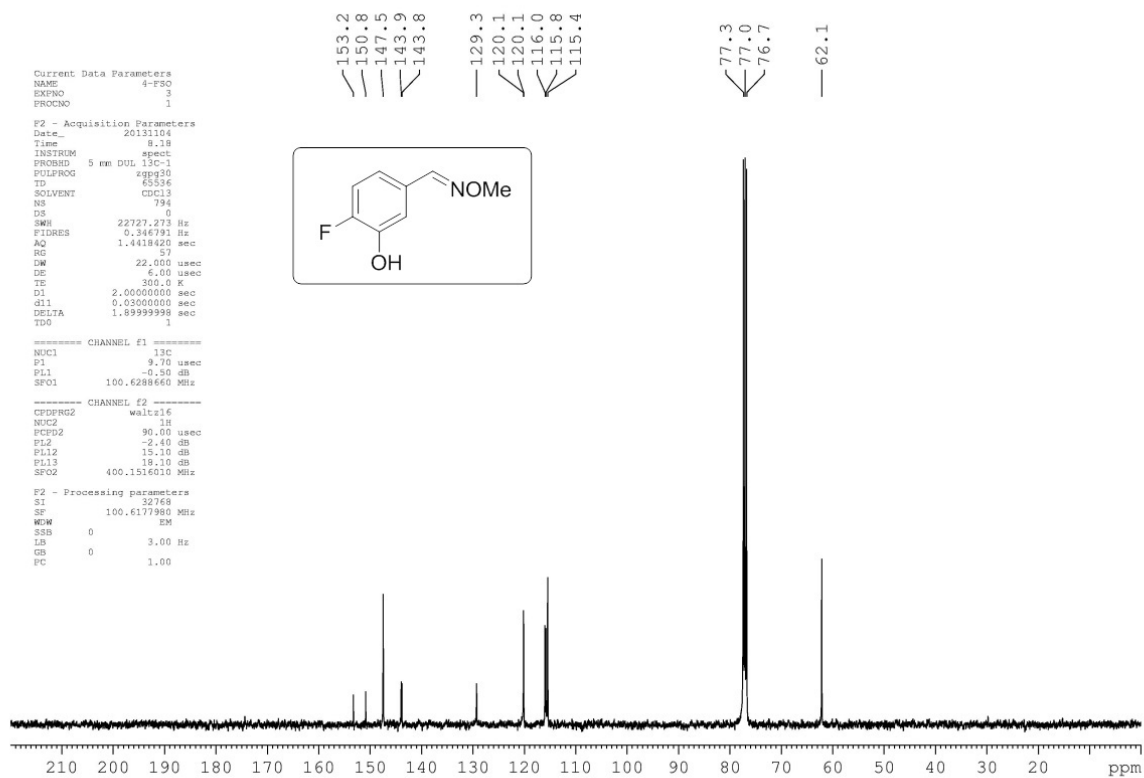



$^1\text{H}$  and  $^{13}\text{C}$  spectra of compound **1i**

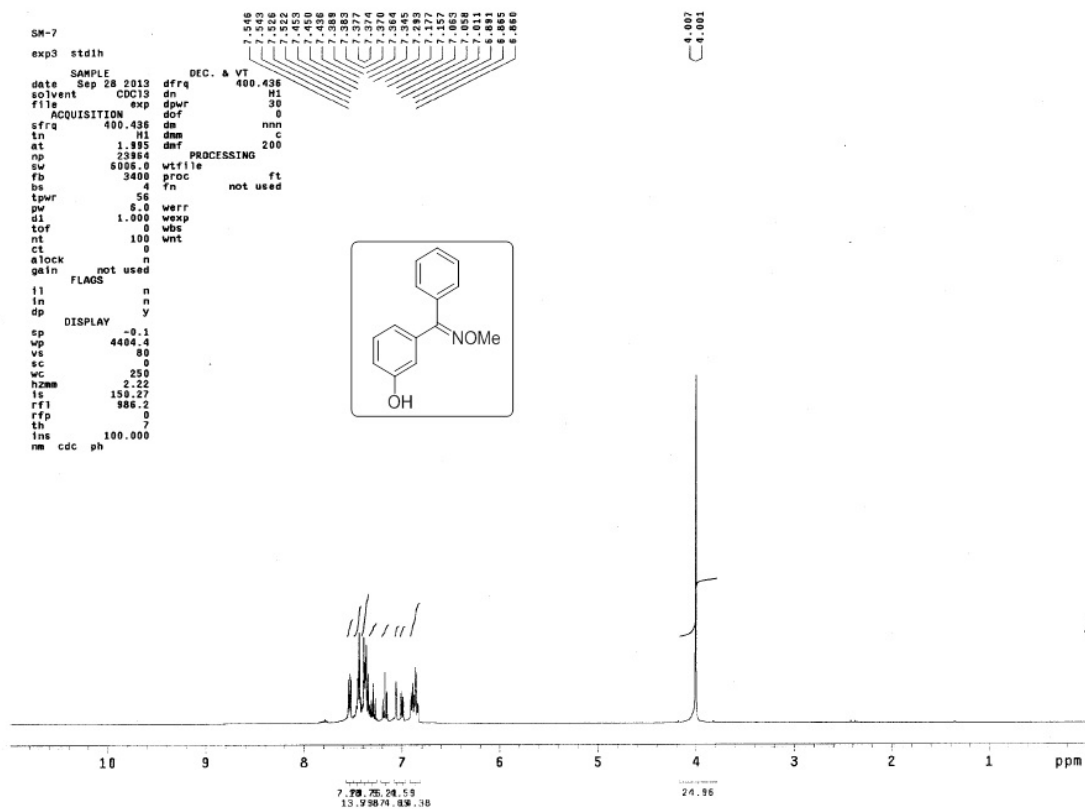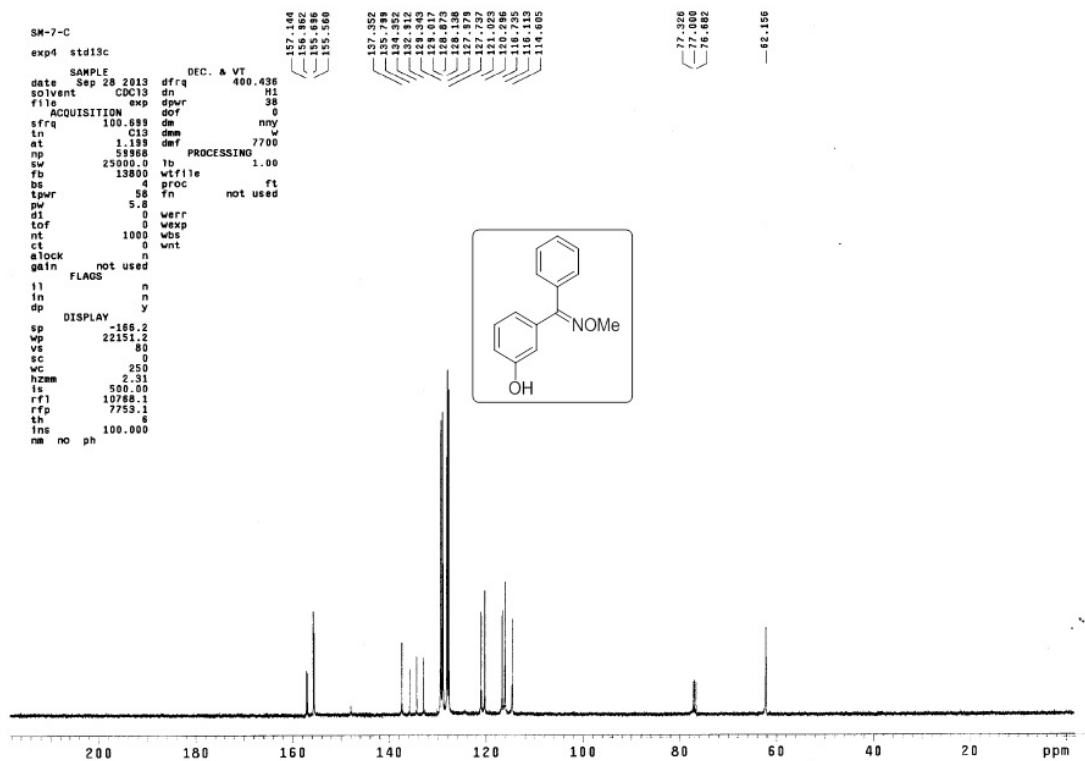

$^1\text{H}$  and  $^{13}\text{C}$  spectra of compound **1j**

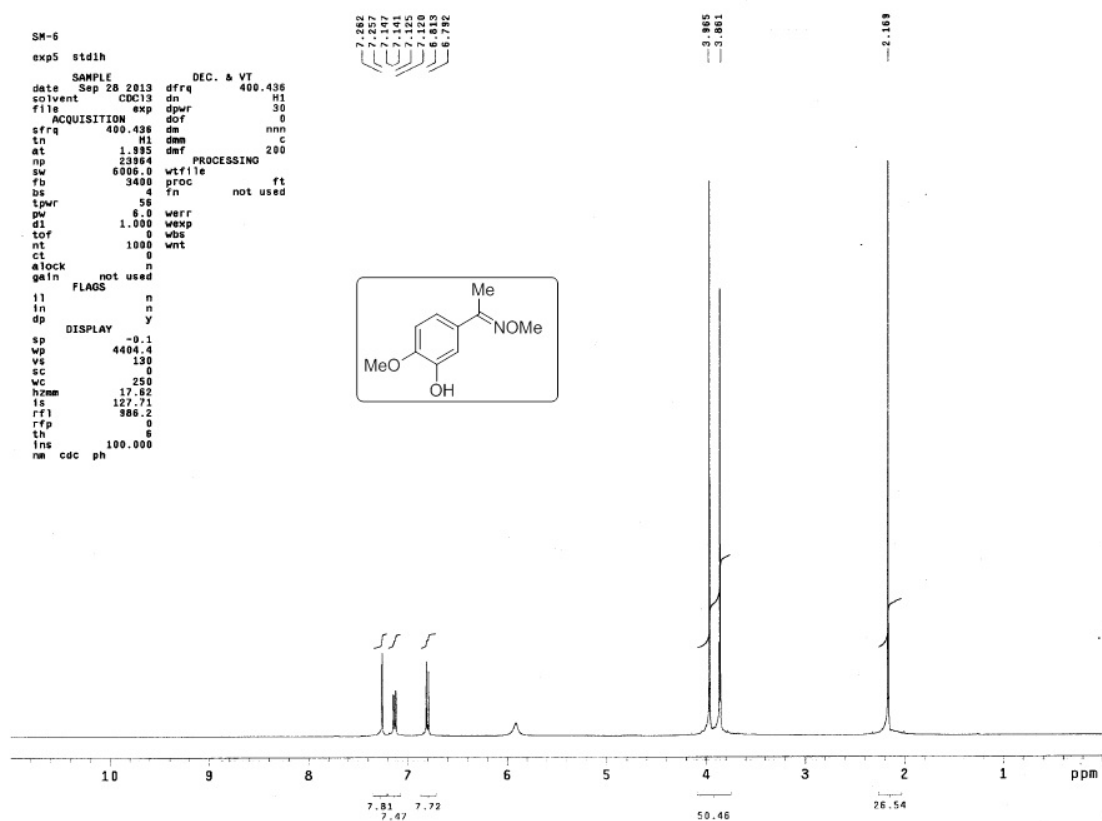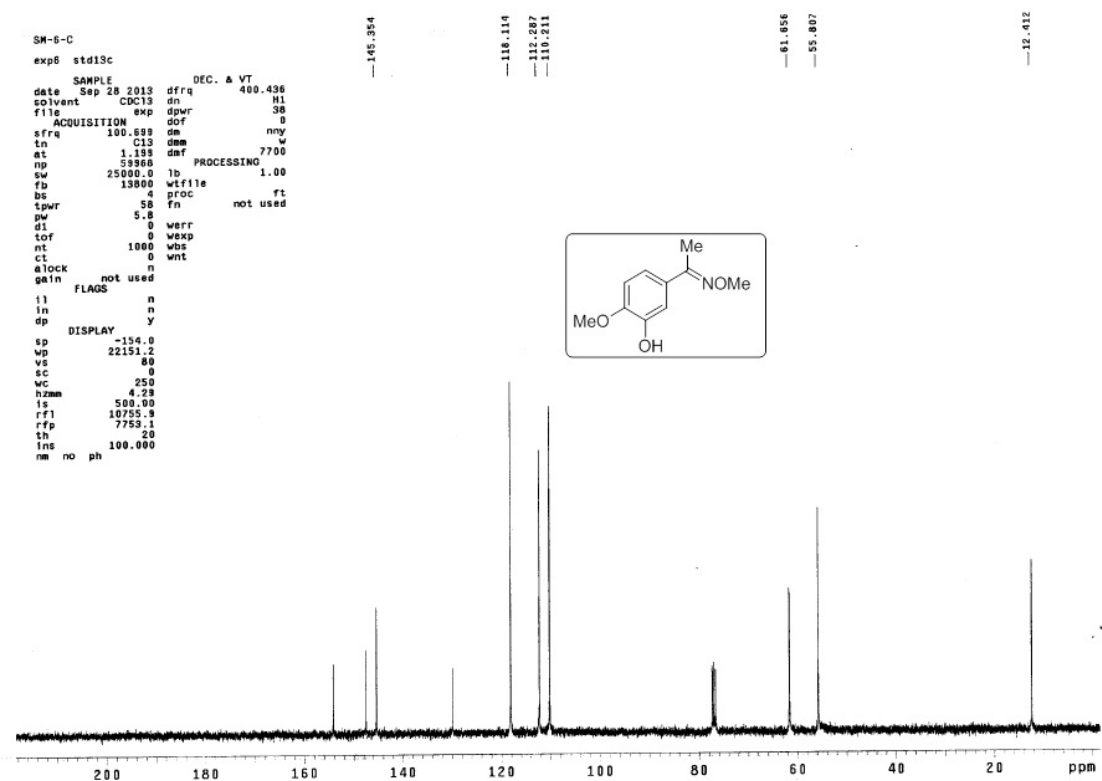

<sup>1</sup>H and <sup>13</sup>C spectra of compound 1k

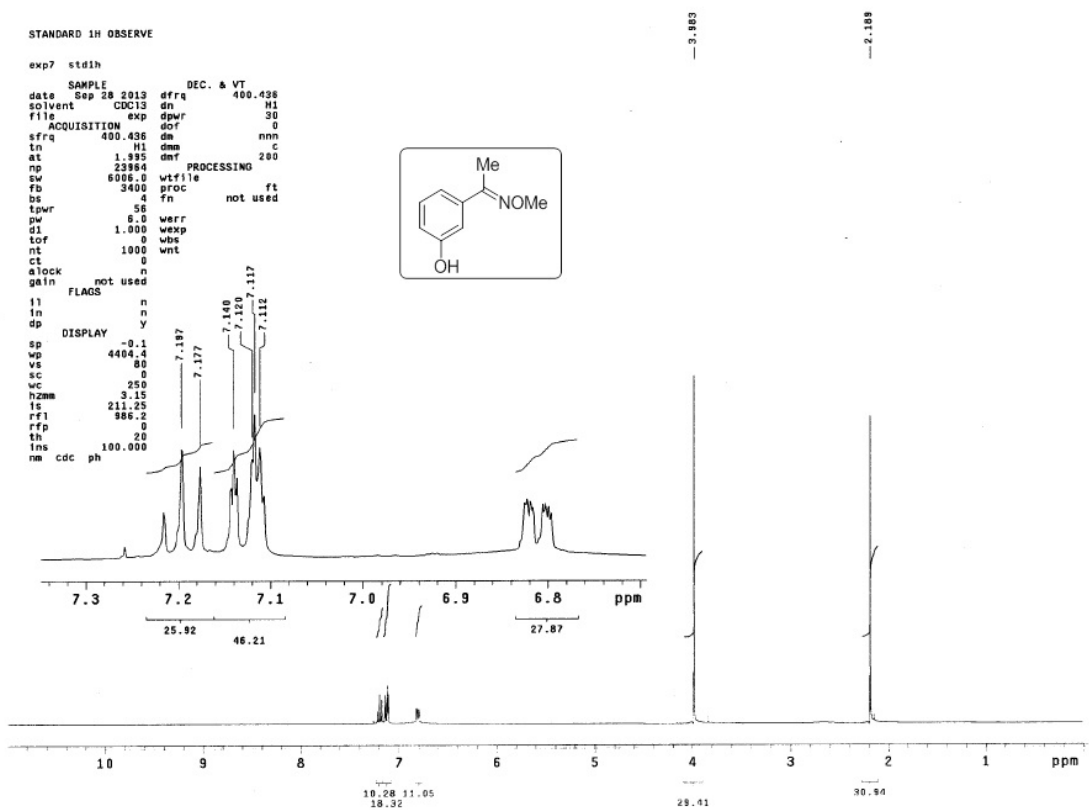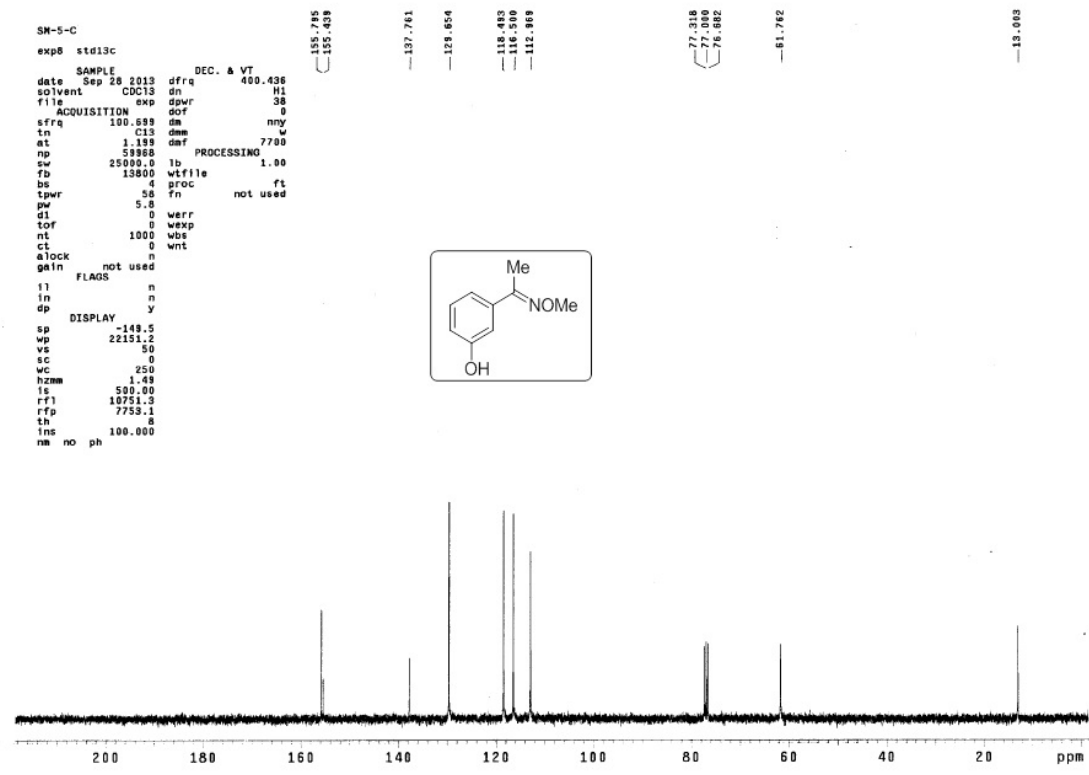

# <sup>1</sup>H and <sup>13</sup>C spectra of compound 11

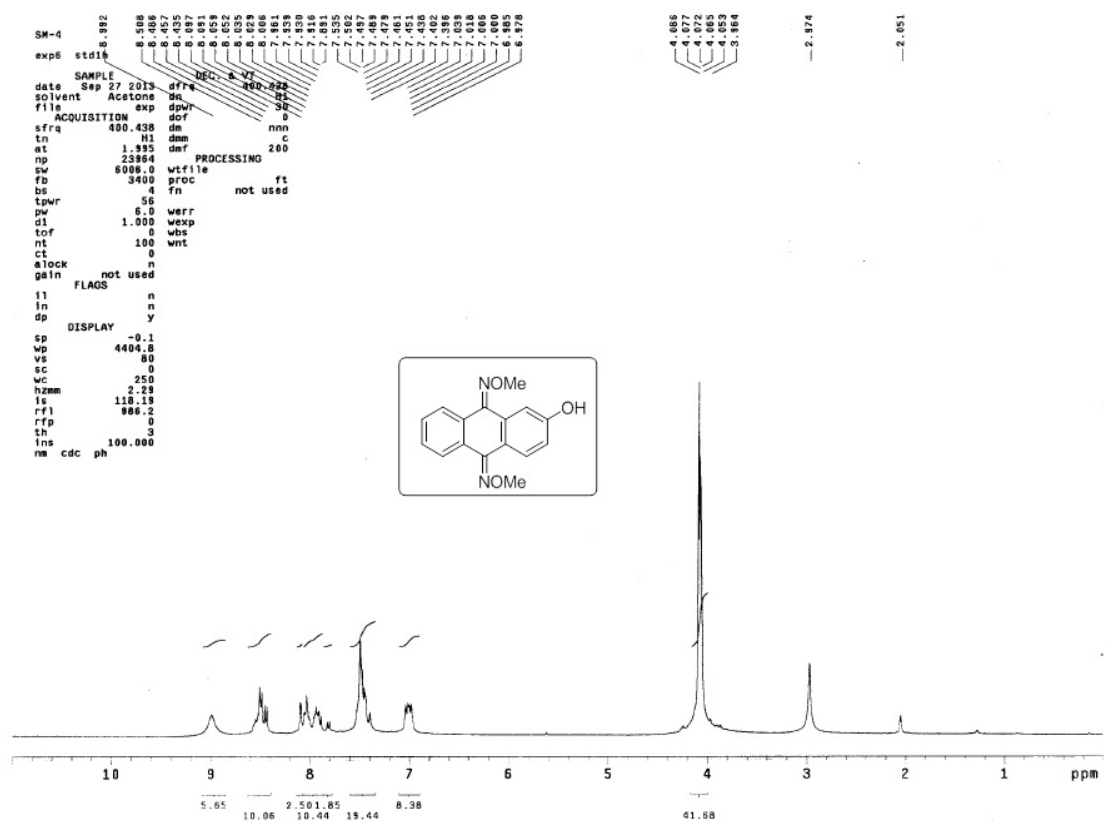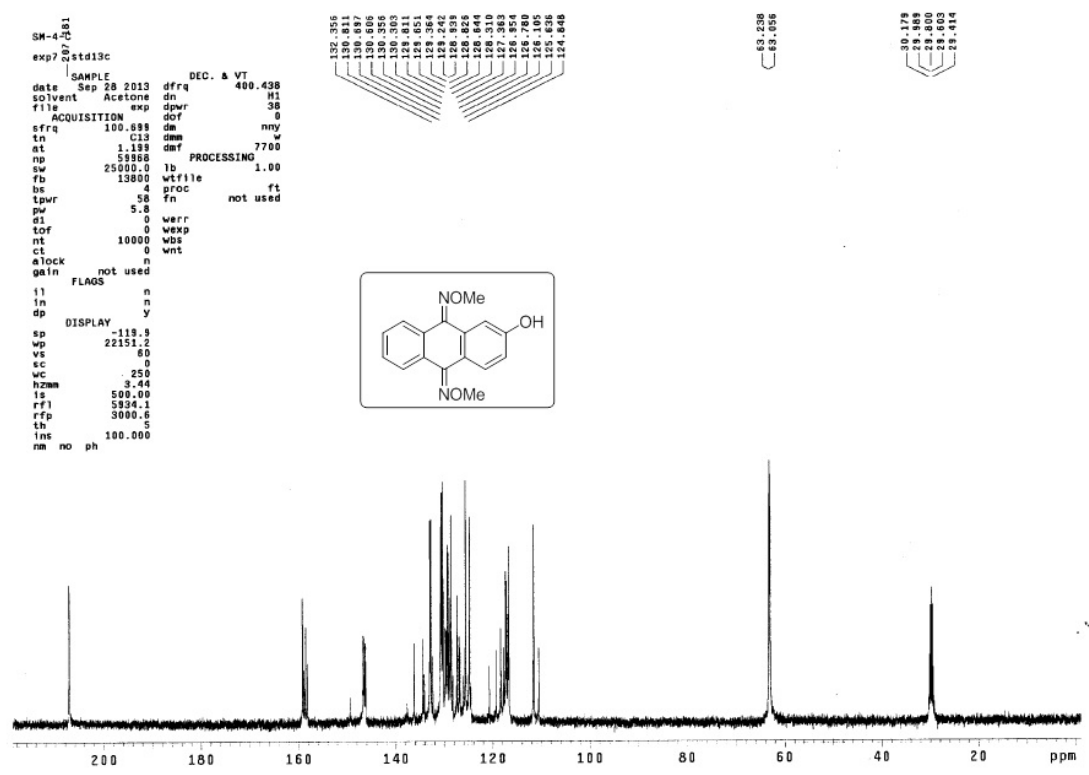

$^1\text{H}$  and  $^{13}\text{C}$  spectra of compound **1m**

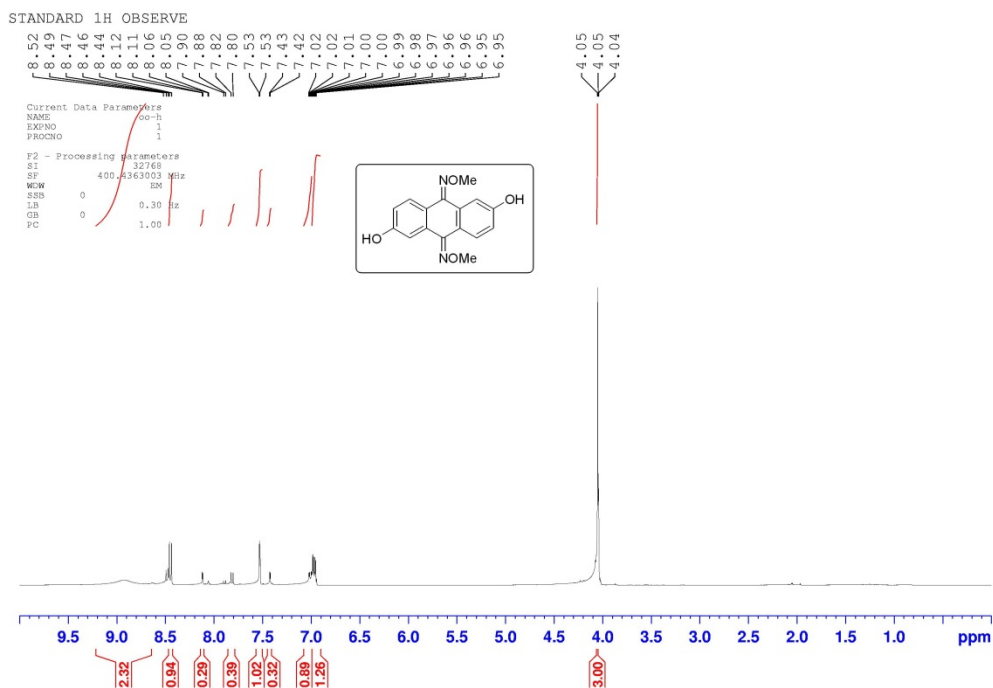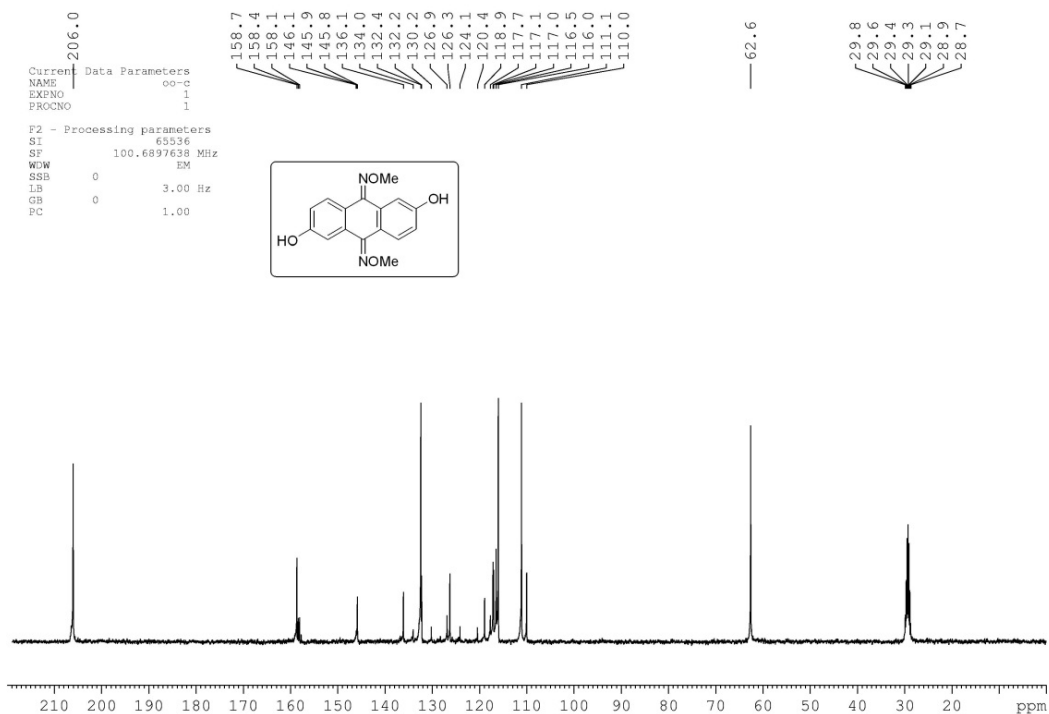

<sup>1</sup>H and <sup>13</sup>C spectra of compound **1n**

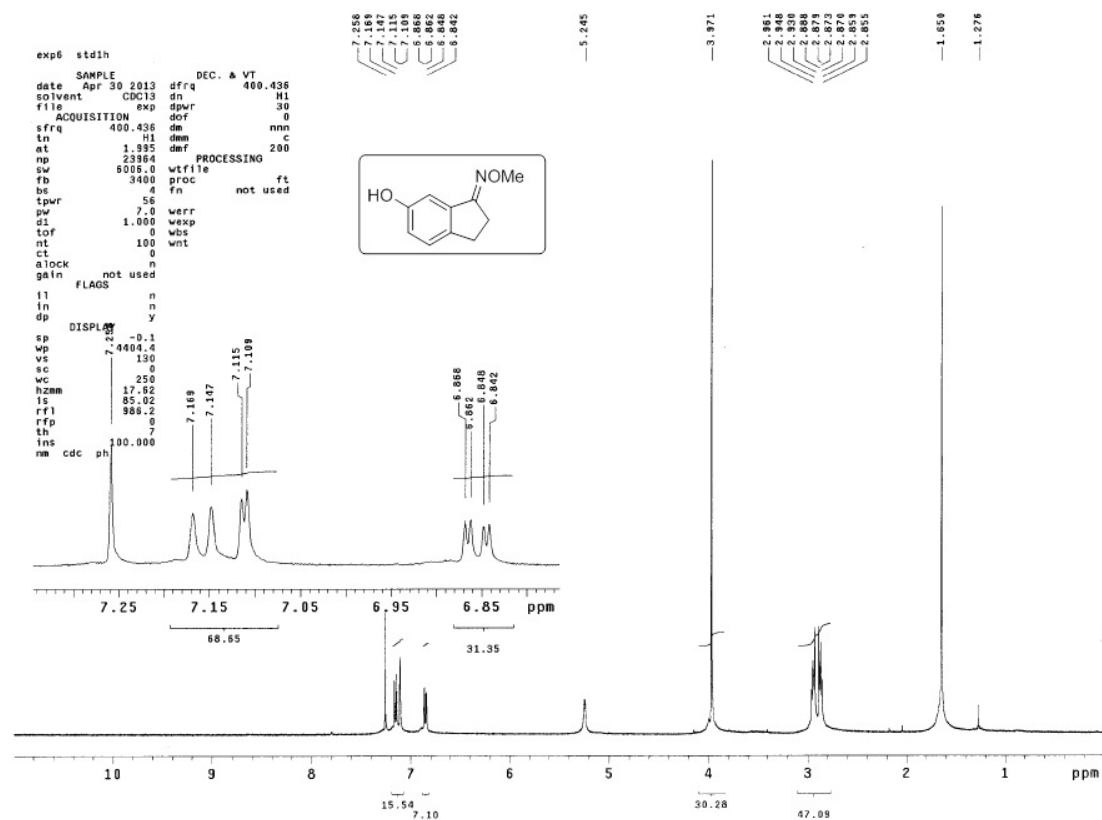

```

Current Data Parameters
NAME: 6-Hydroxy-2-methoxyindole
EXPNO: 1
PROCNO: 1
F2 - Processing parameters
SI 0
SF 400.146360 MHz
NUC1 13C
NUC2 13C
AQ 0.30 Hz
RG 0
PC 1.00
    
```

162.8  
155.0  
140.6  
137.3  
126.4  
118.5  
107.2  
77.3  
77.0  
76.7  
62.0  
27.8  
27.0

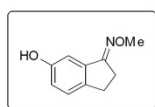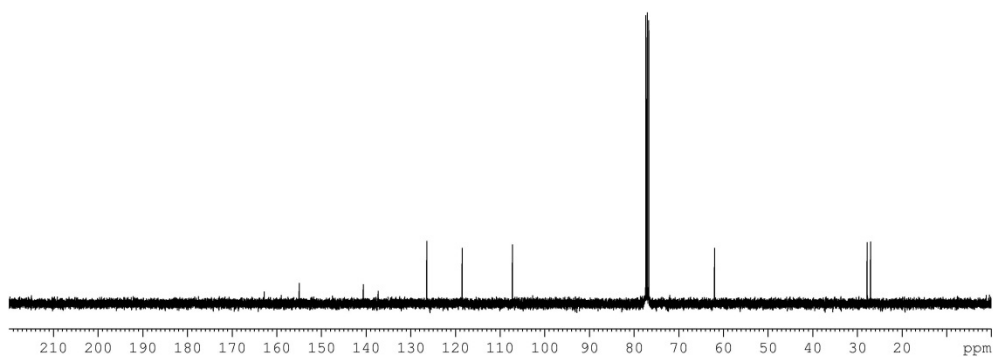

$^1\text{H}$  and  $^{13}\text{C}$  spectra of compound **1o**

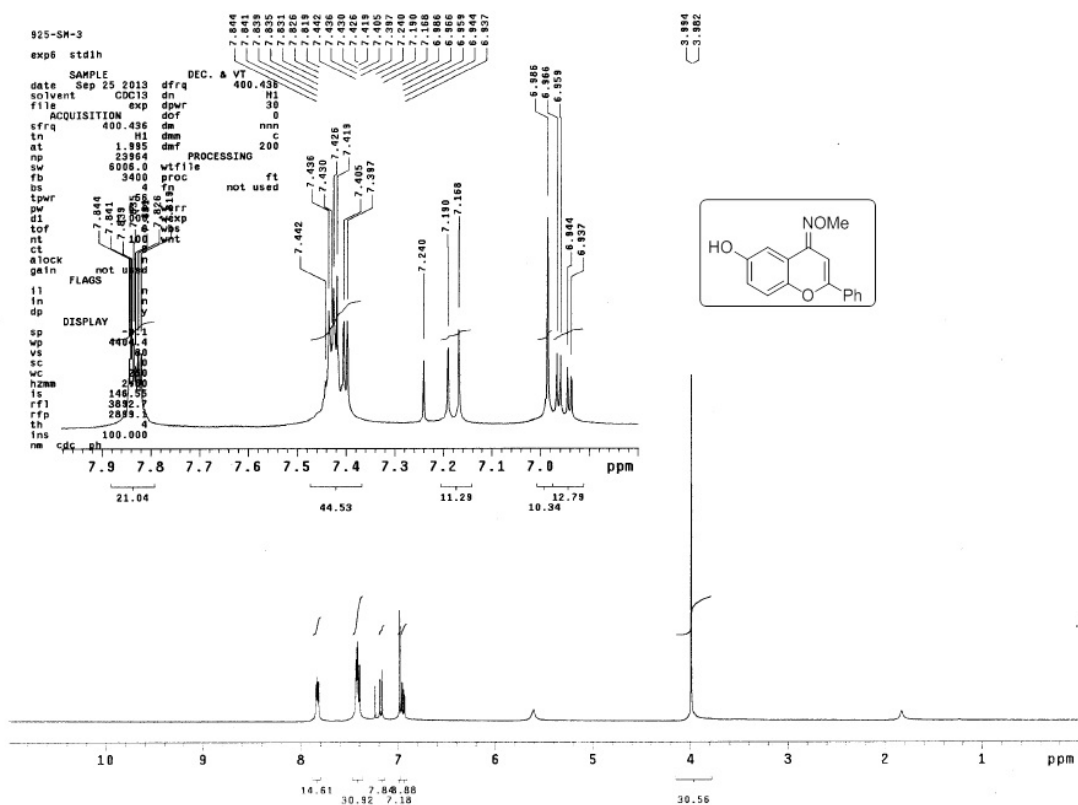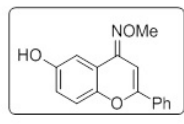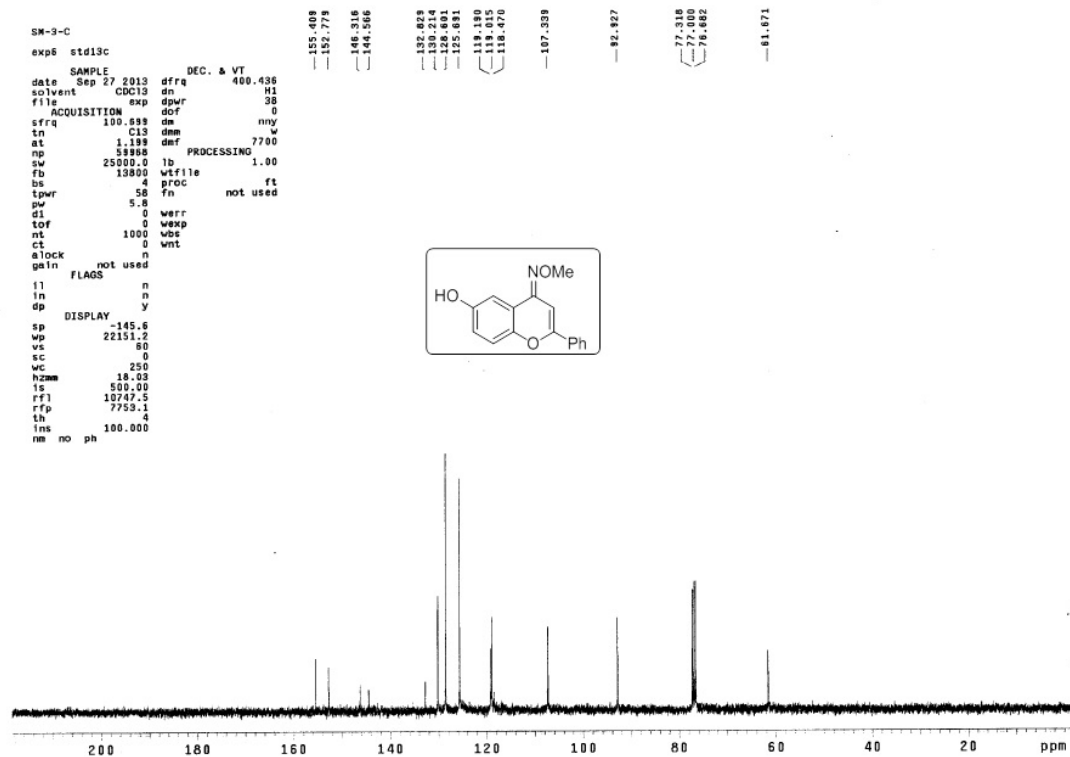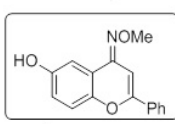

# H and <sup>13</sup>C spectra of compound 3aa

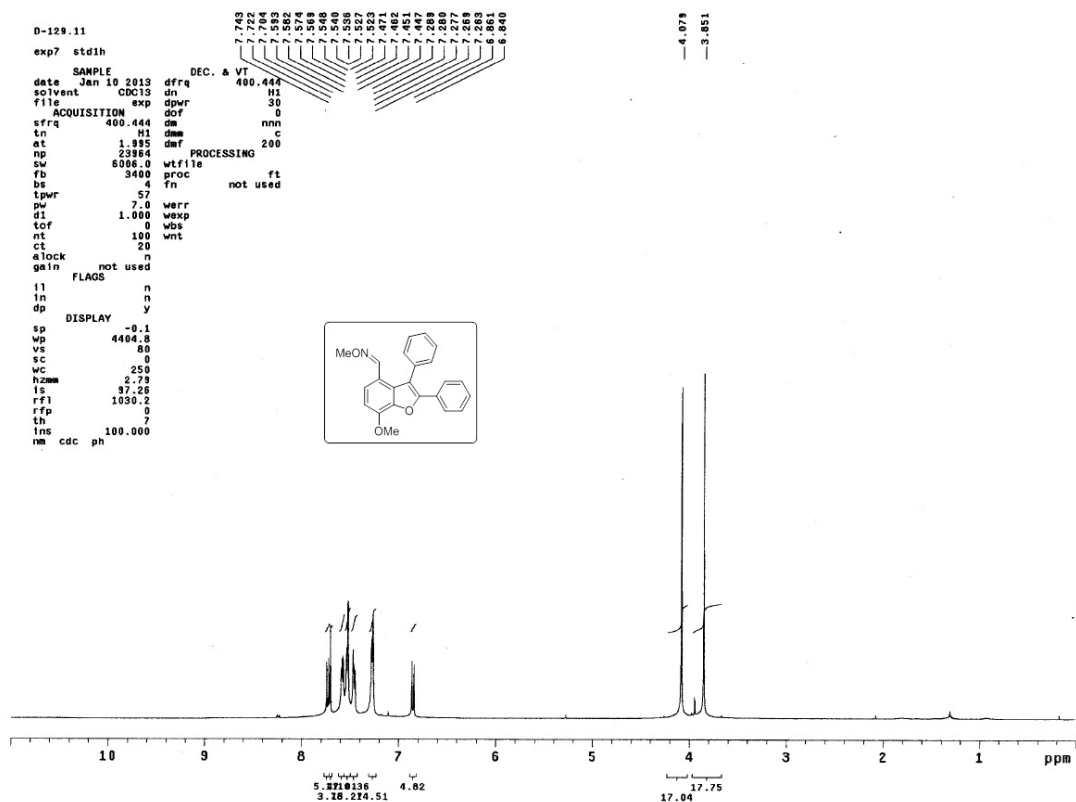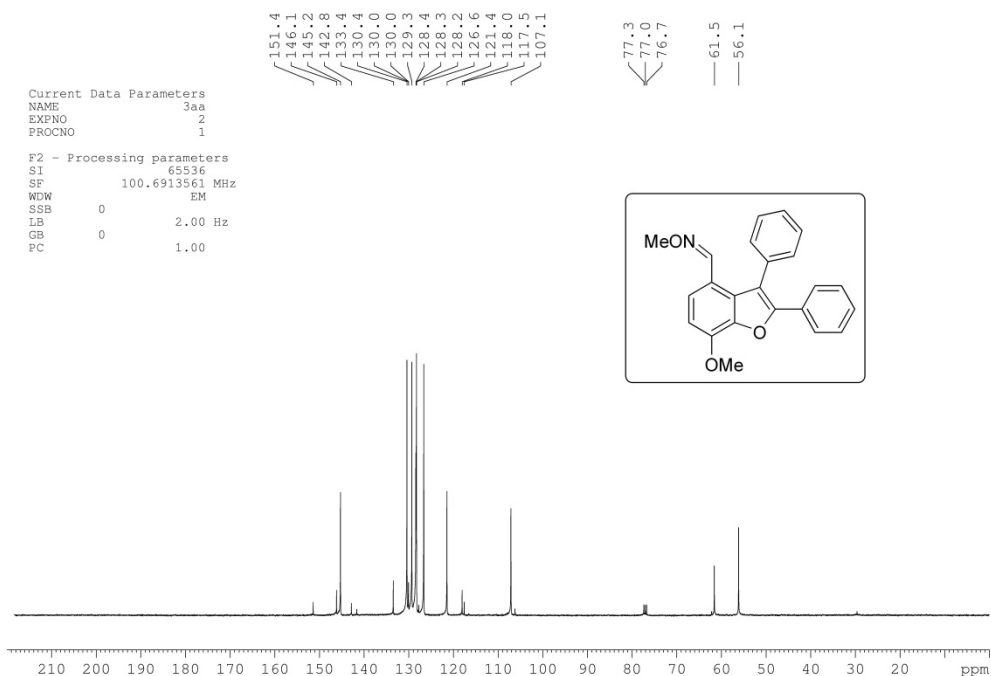



# $^1\text{H}$ and $^{13}\text{C}$ spectra of compound **3ab**

296-2

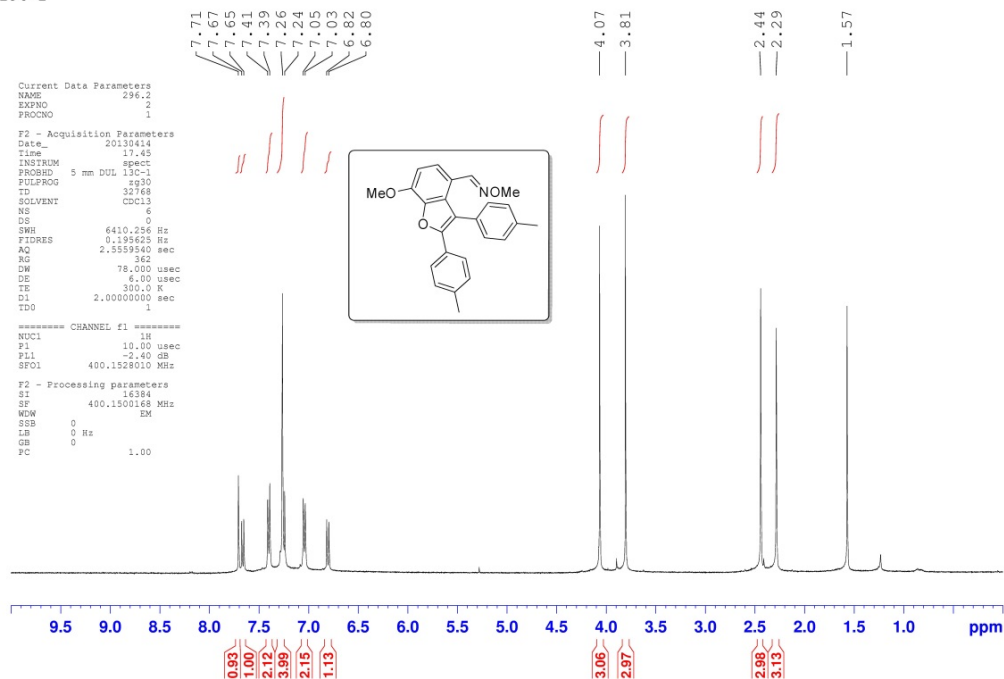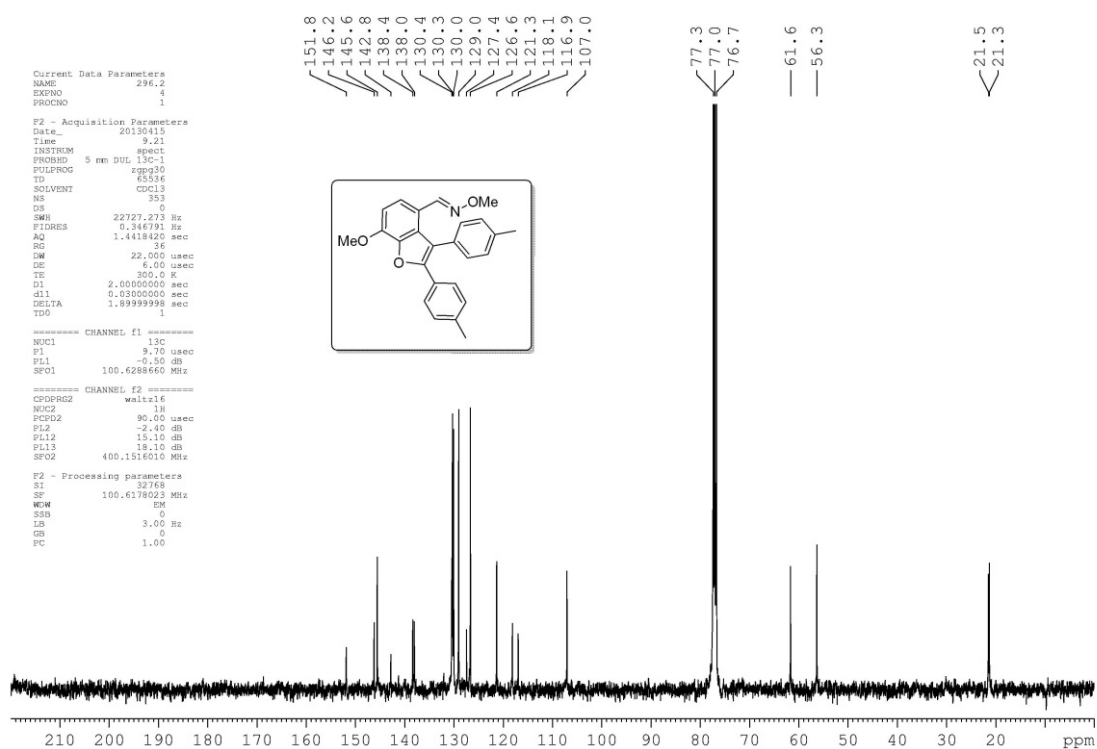

# $^1\text{H}$ and $^{13}\text{C}$ spectra of compound **3ac**

297-P

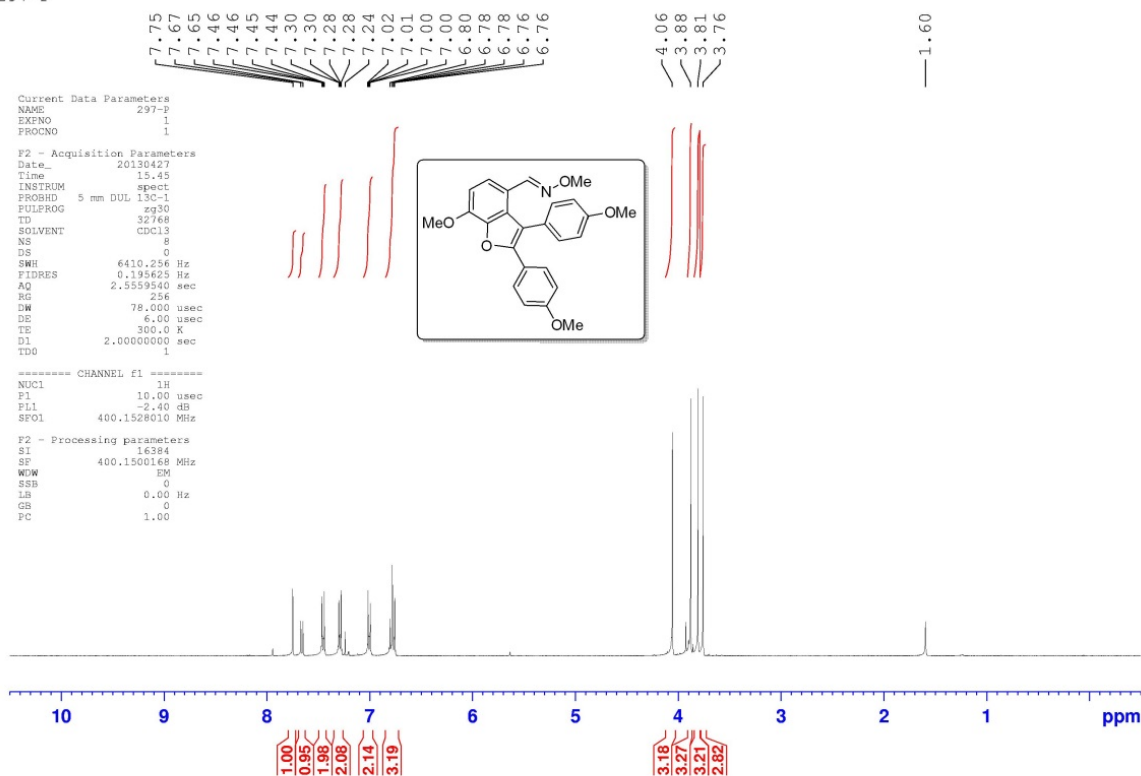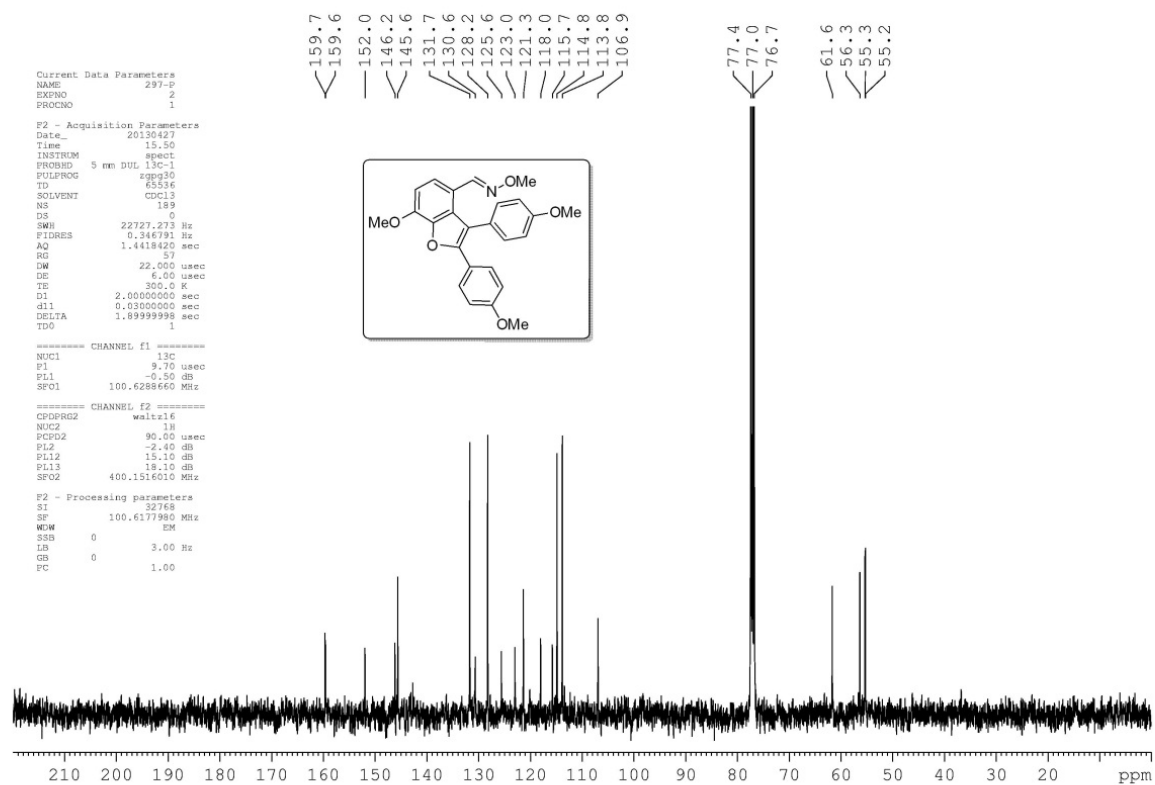

# <sup>1</sup>H and <sup>13</sup>C spectra of compound 3ad

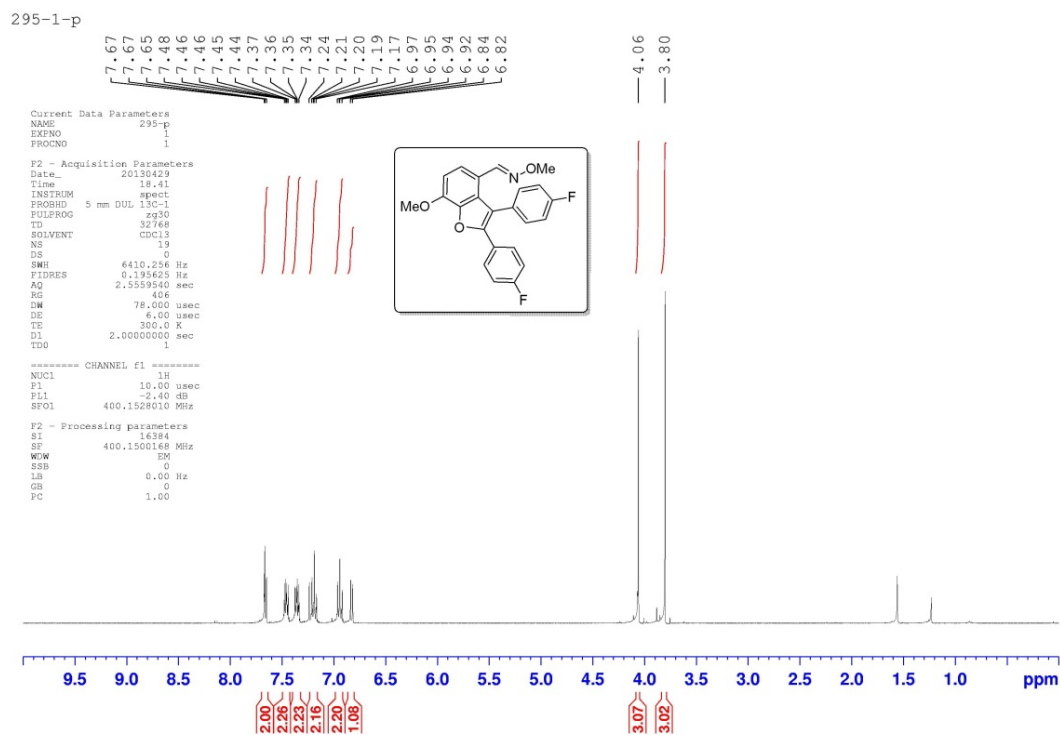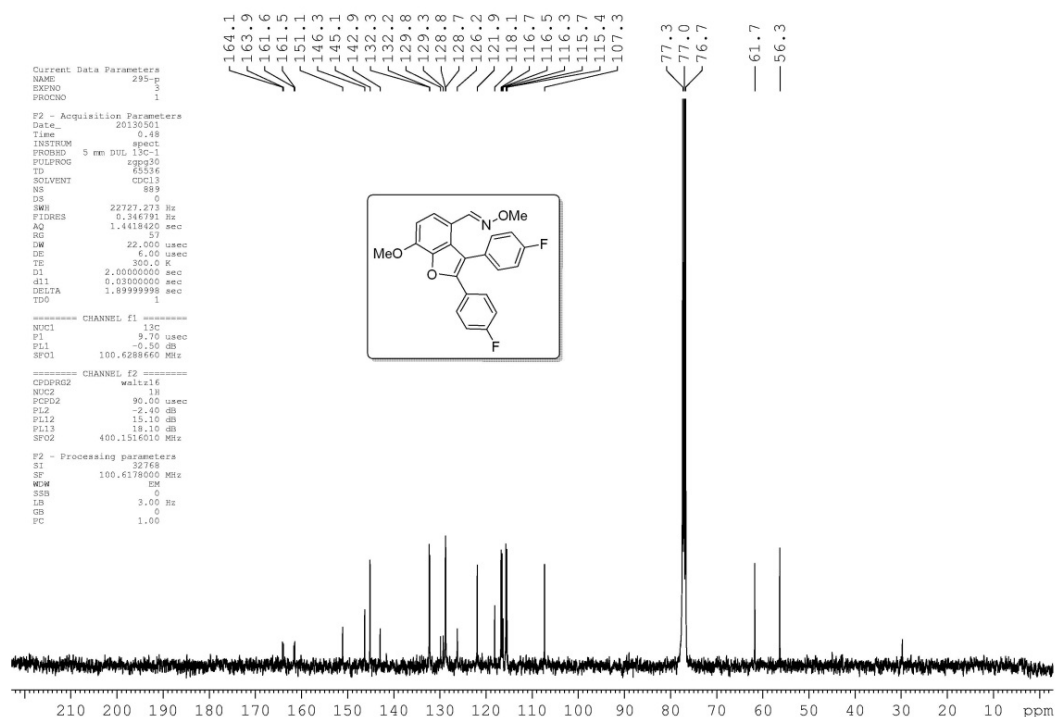

# <sup>1</sup>H and <sup>13</sup>C spectra of compound 3ae

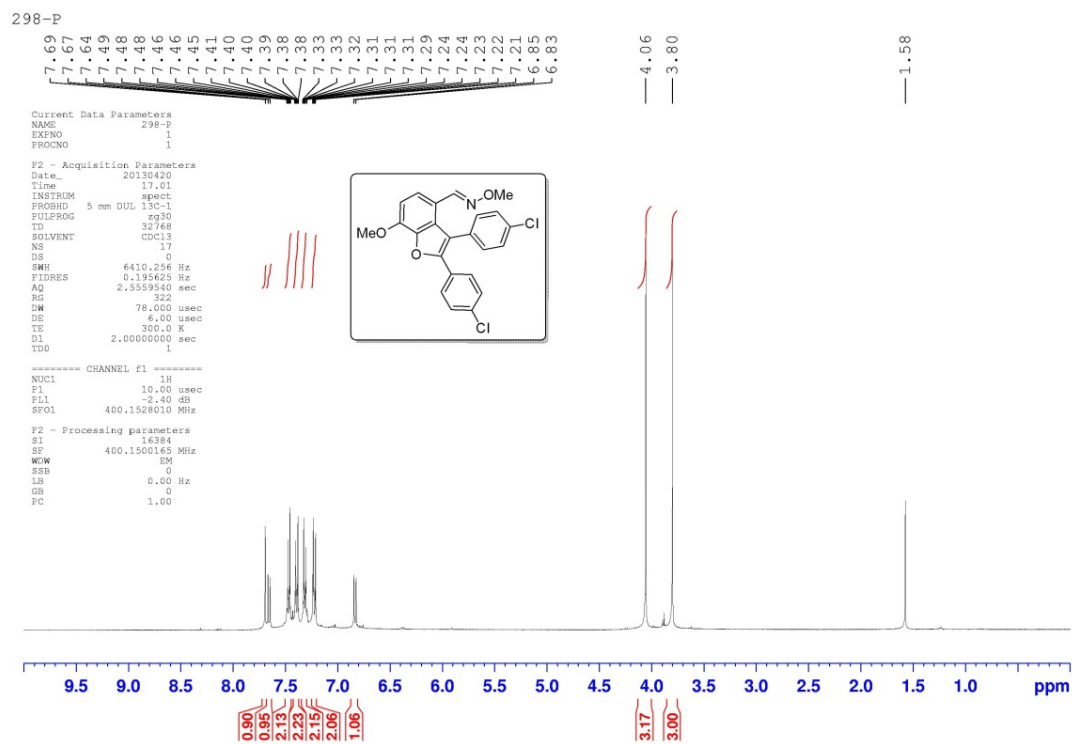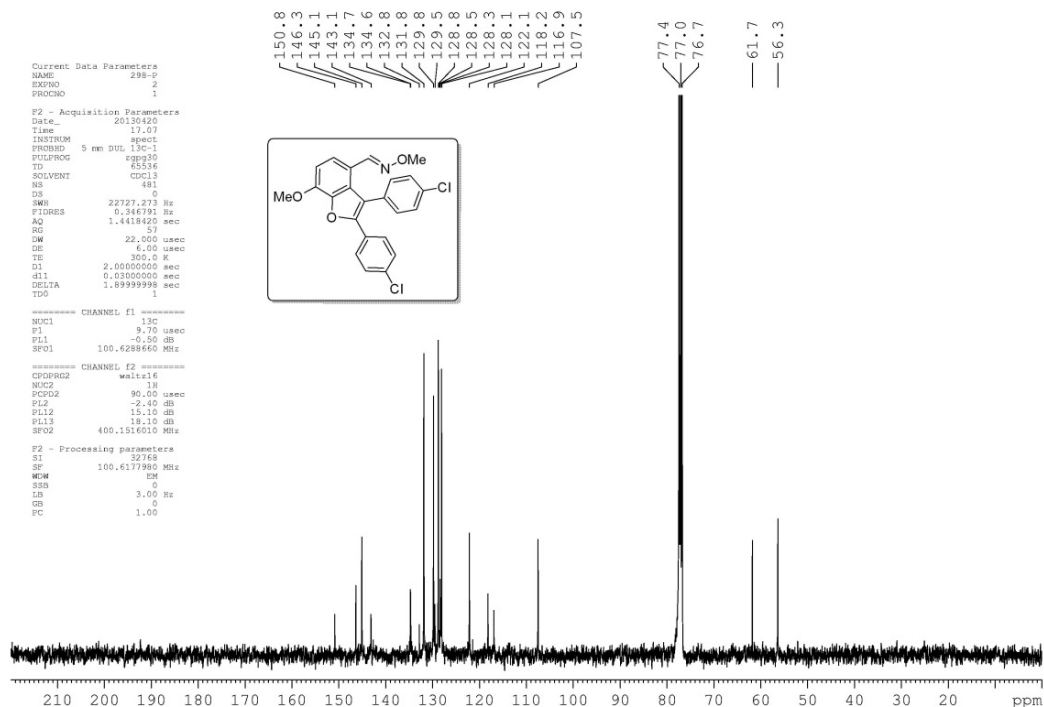

$^1\text{H}$  and  $^{13}\text{C}$  spectra of compound **3af**

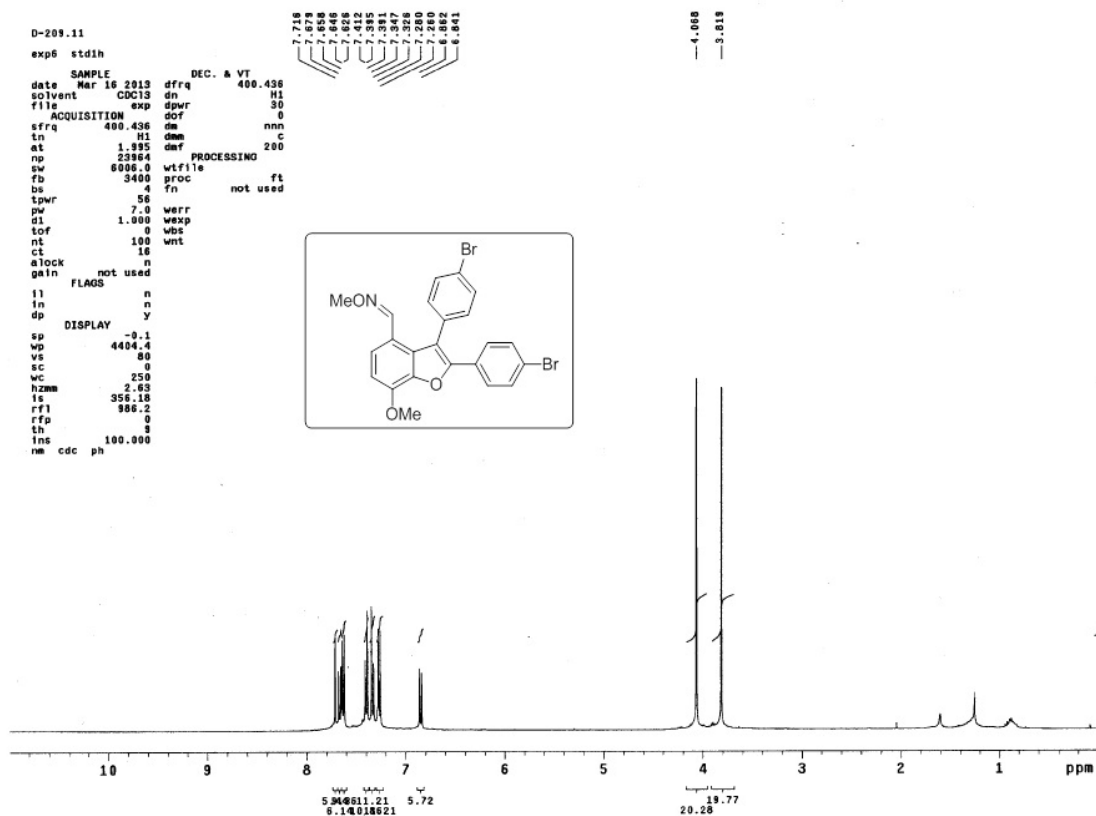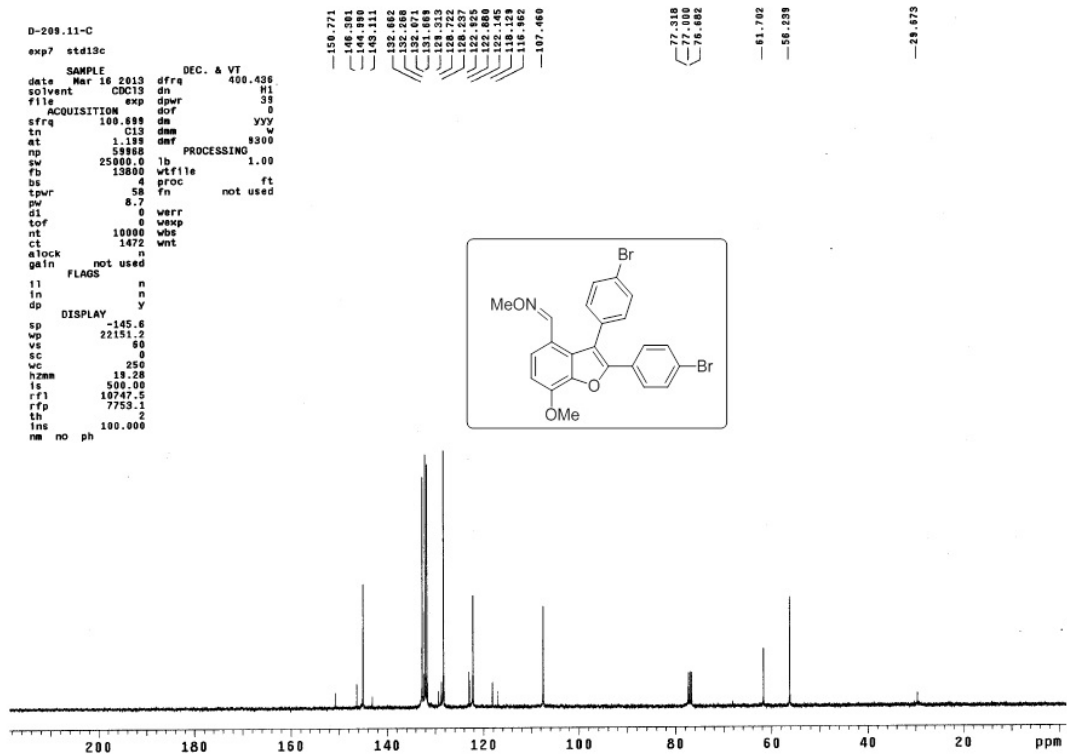

$^1\text{H}$  and  $^{13}\text{C}$  spectra of compound **3ag**

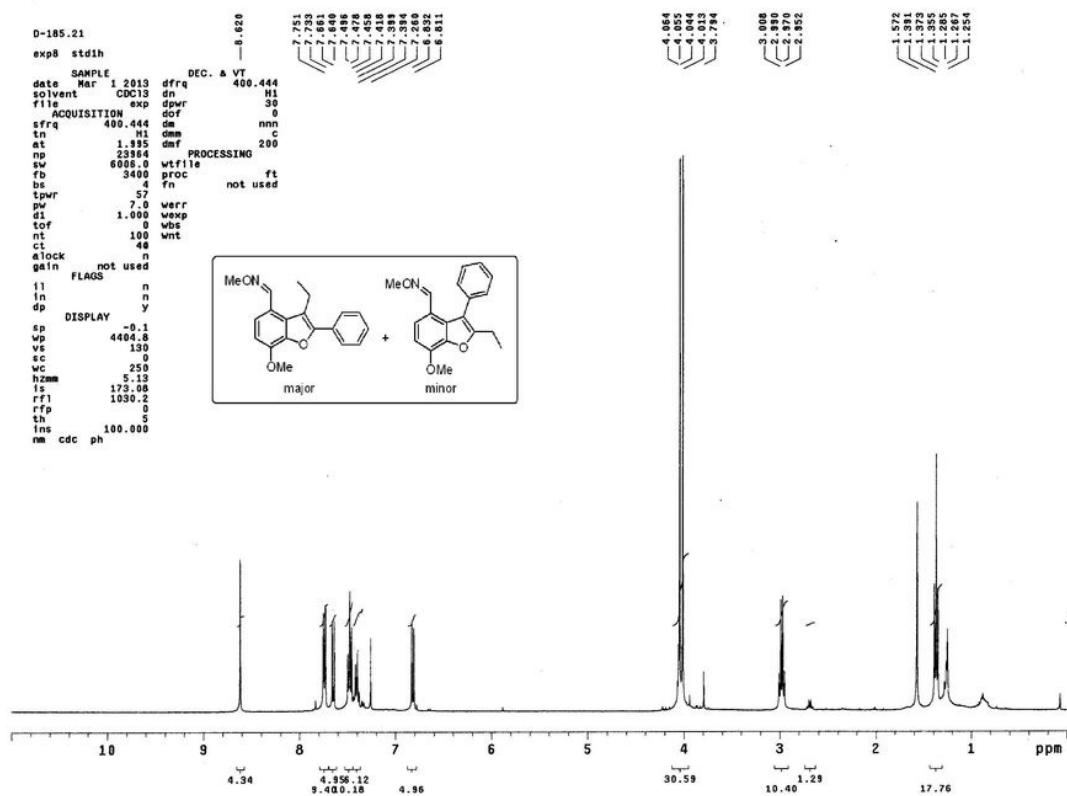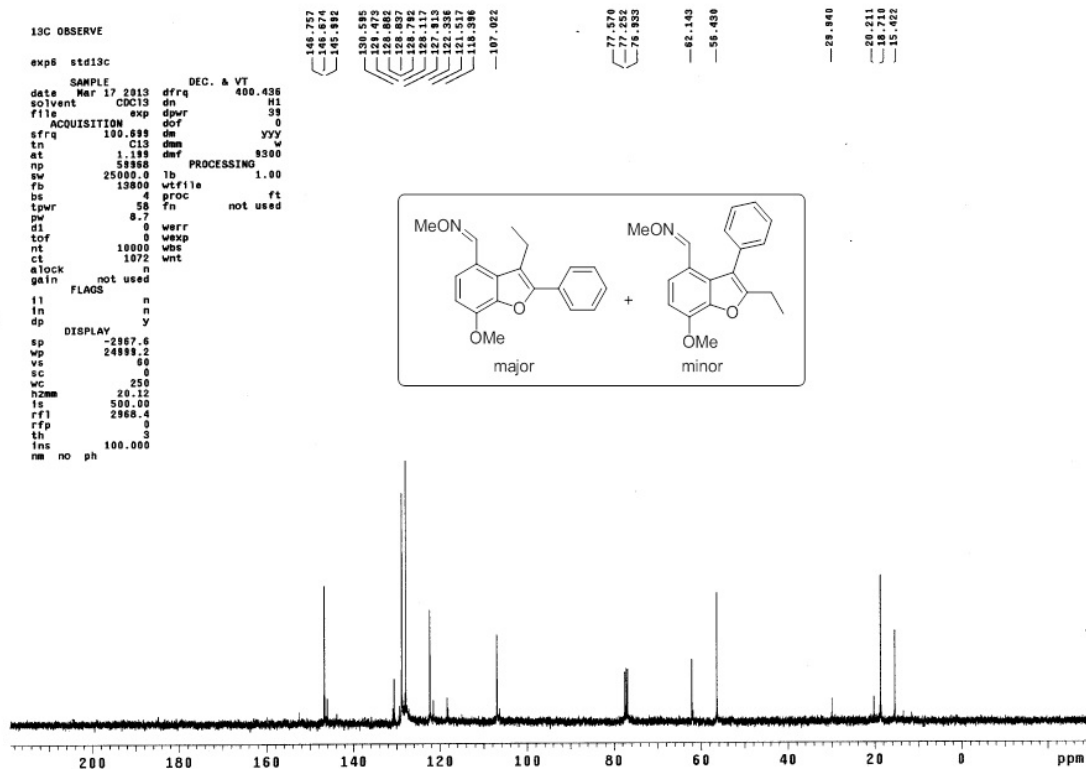

$^1\text{H}$  and  $^{13}\text{C}$  spectra of compound **3ah**

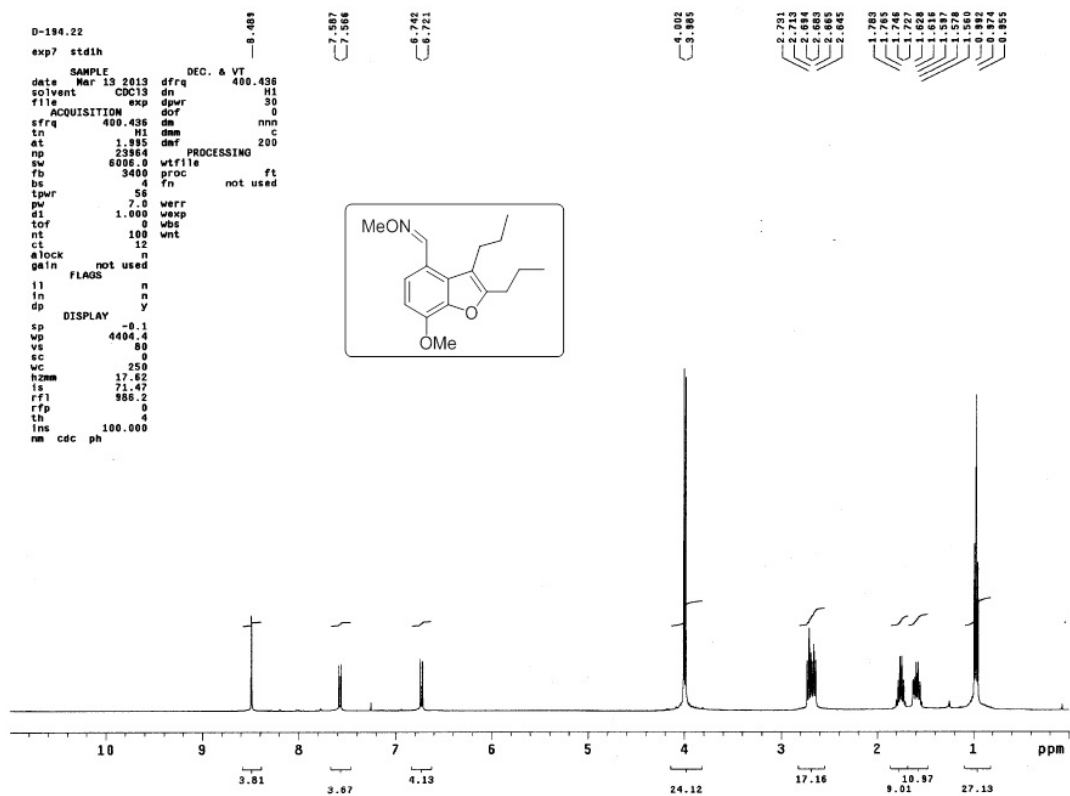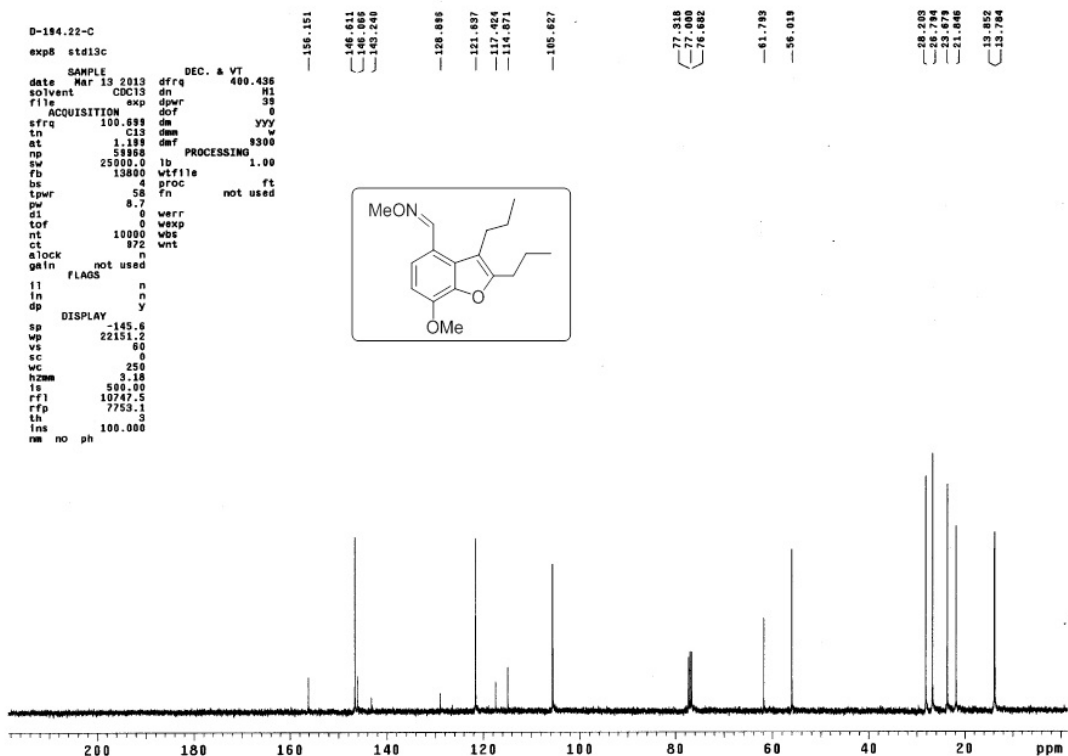

$^1\text{H}$  and  $^{13}\text{C}$  spectra of compound **3ah'**

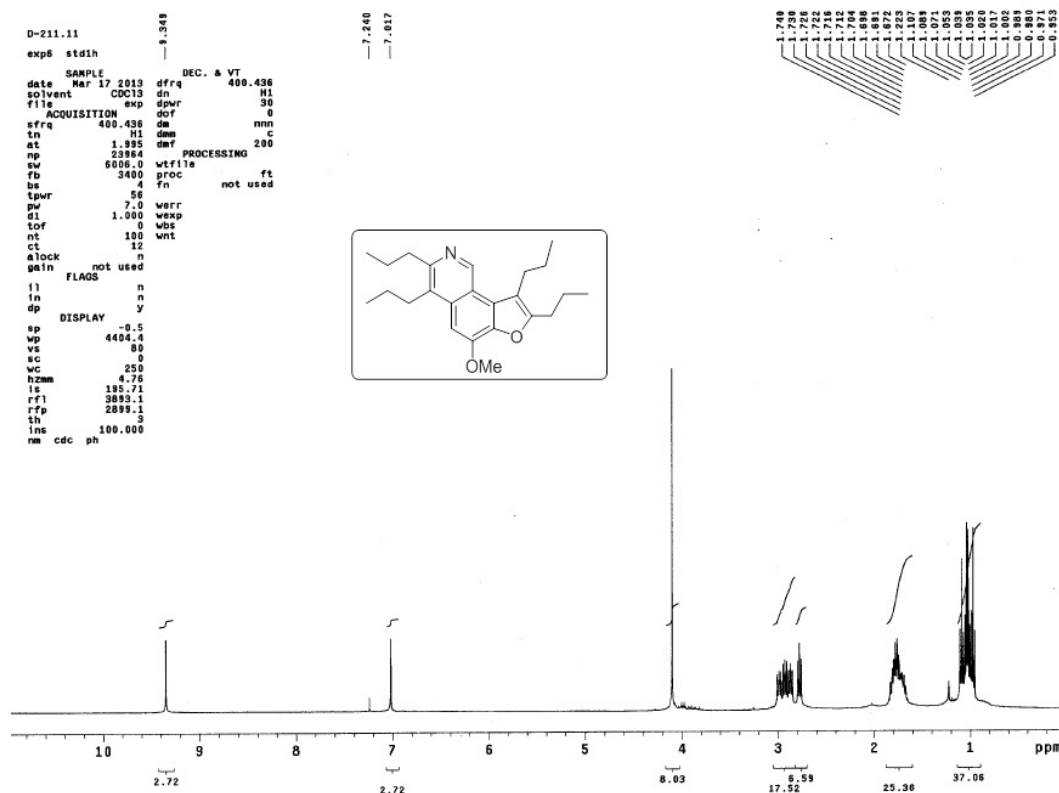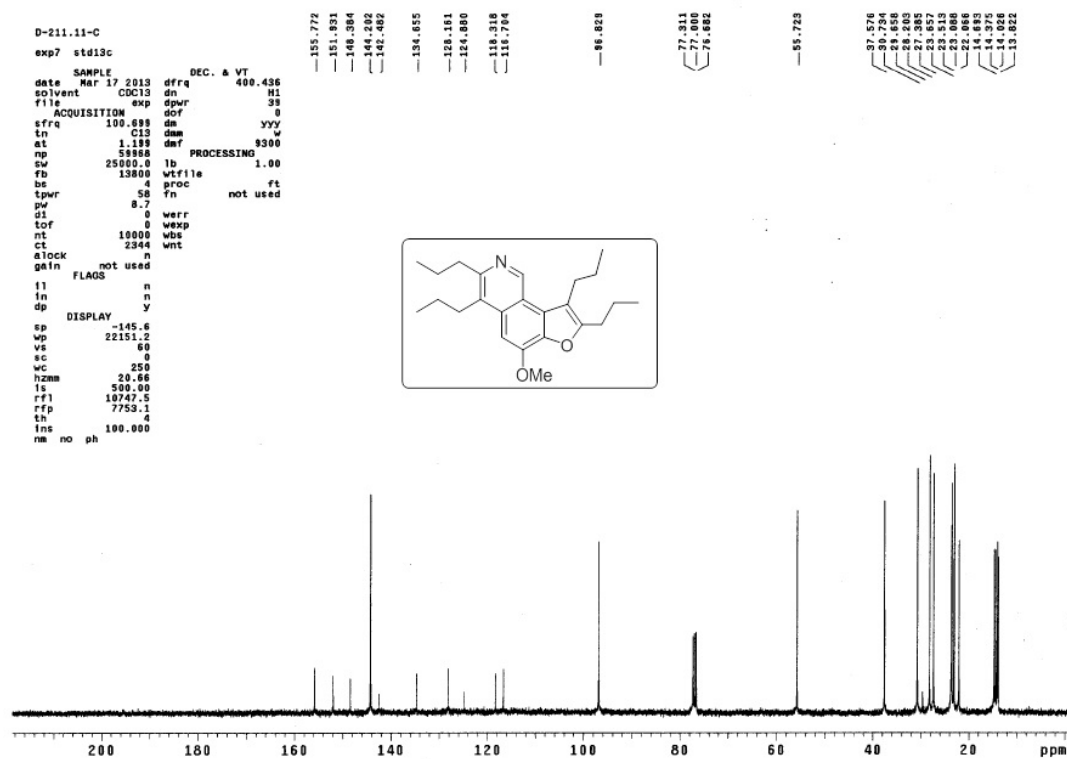



# <sup>1</sup>H and <sup>13</sup>C spectra of compound 3ai

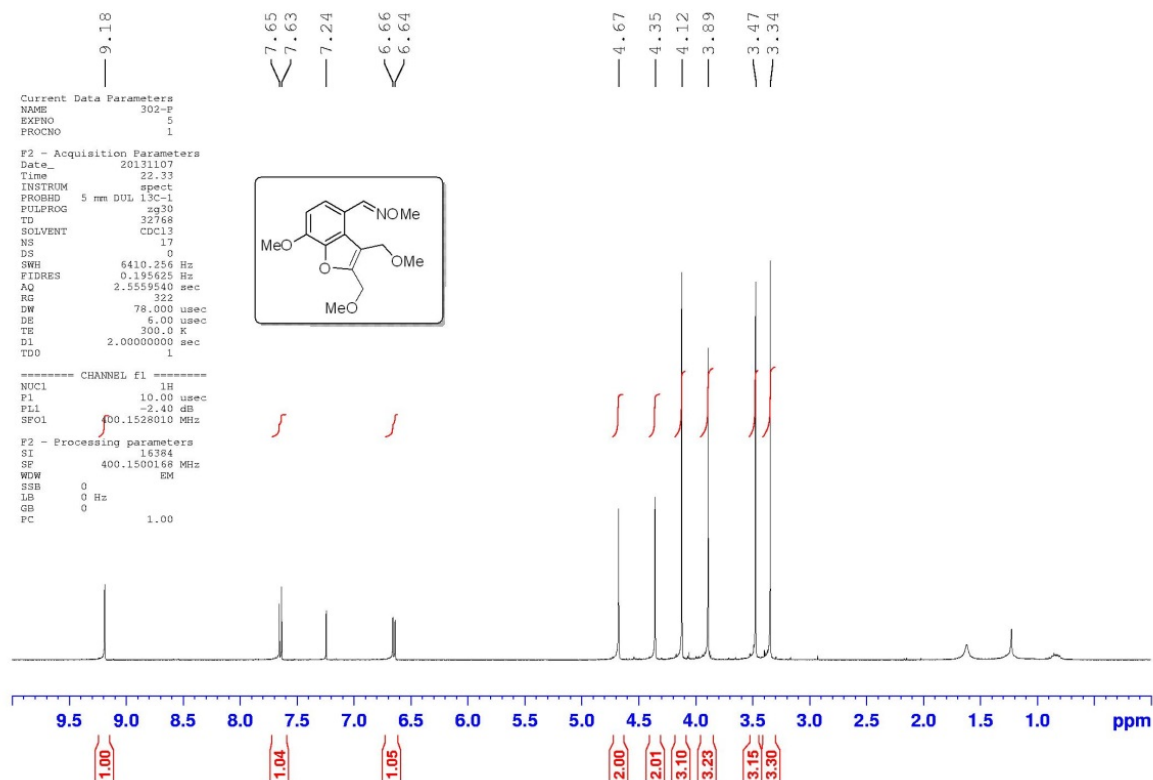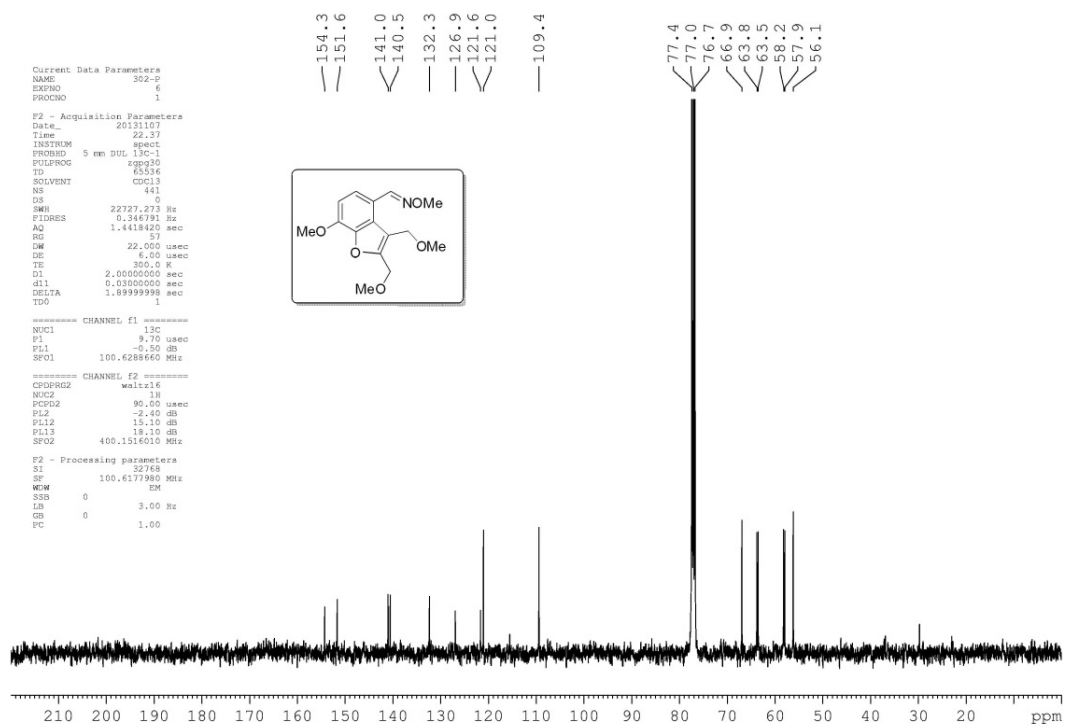

$^1\text{H}$  and  $^{13}\text{C}$  spectra of compound **3ba**

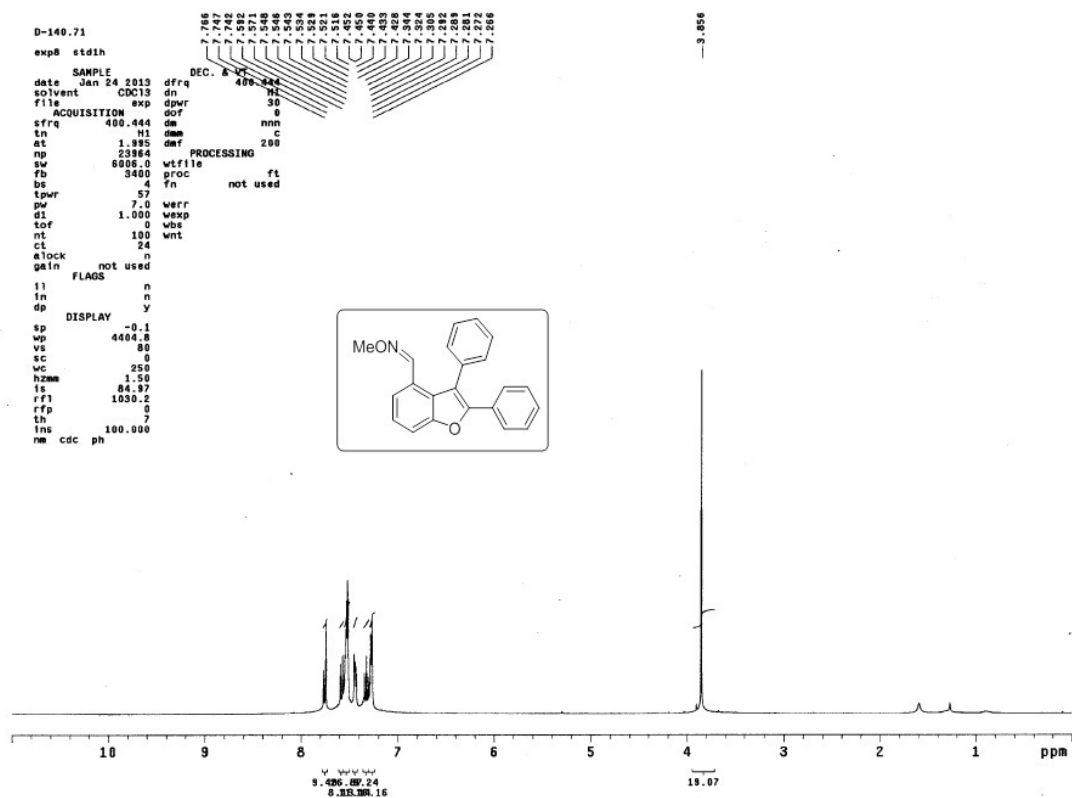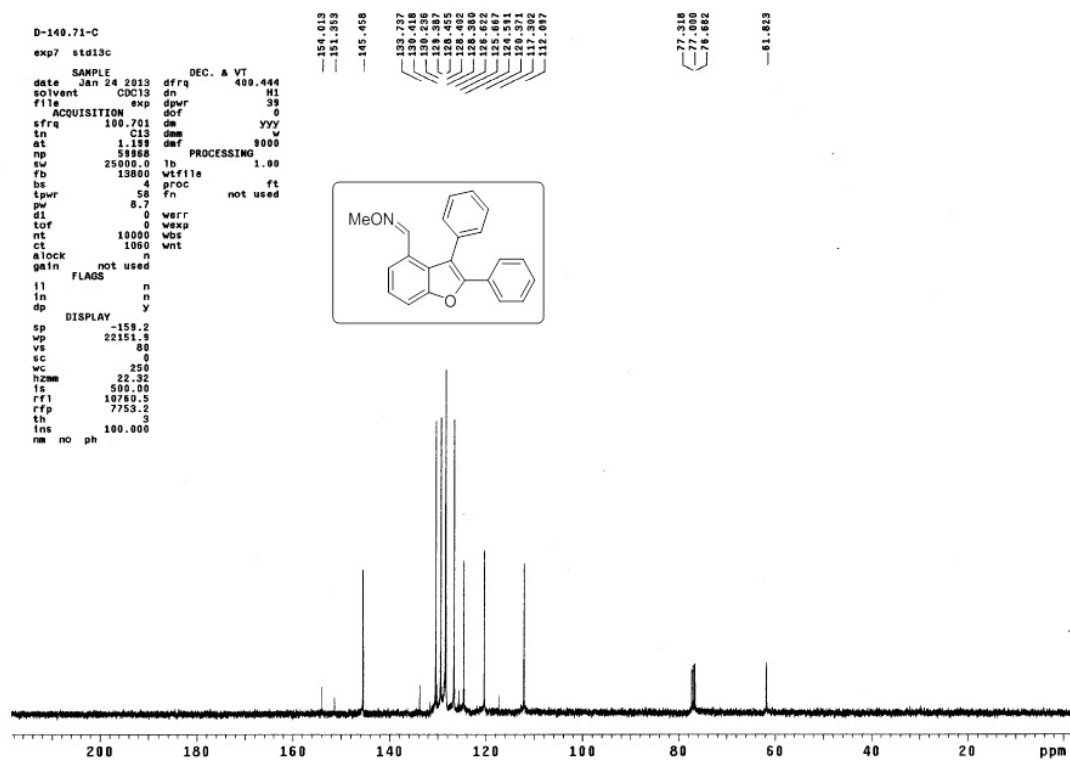

# <sup>1</sup>H and <sup>13</sup>C spectra of compound 3ca

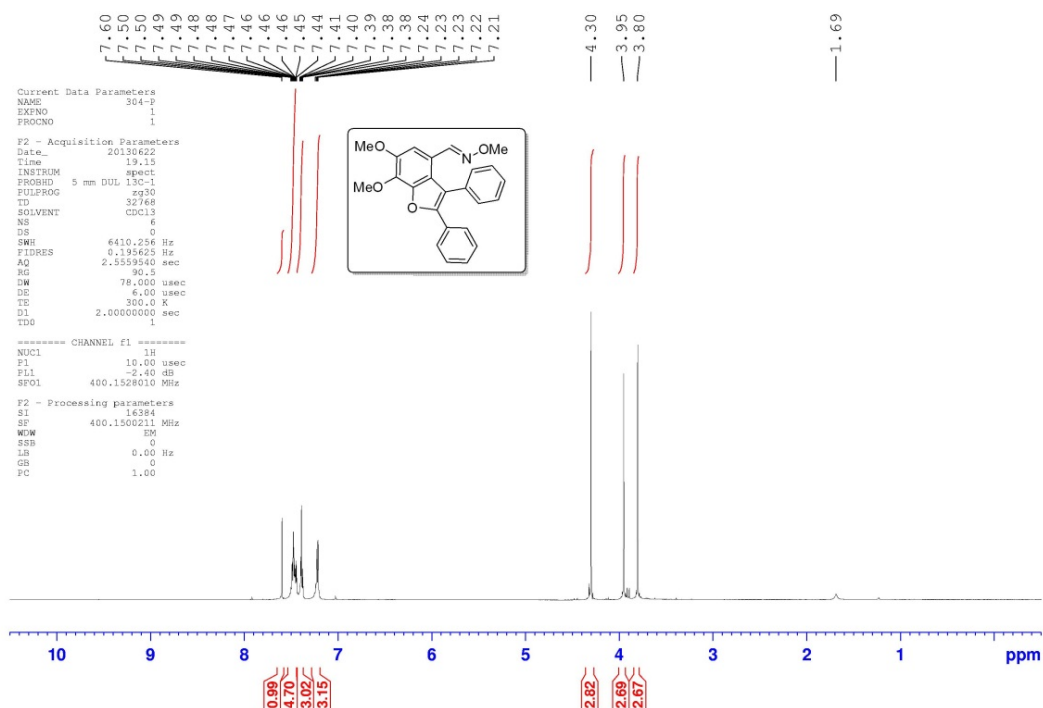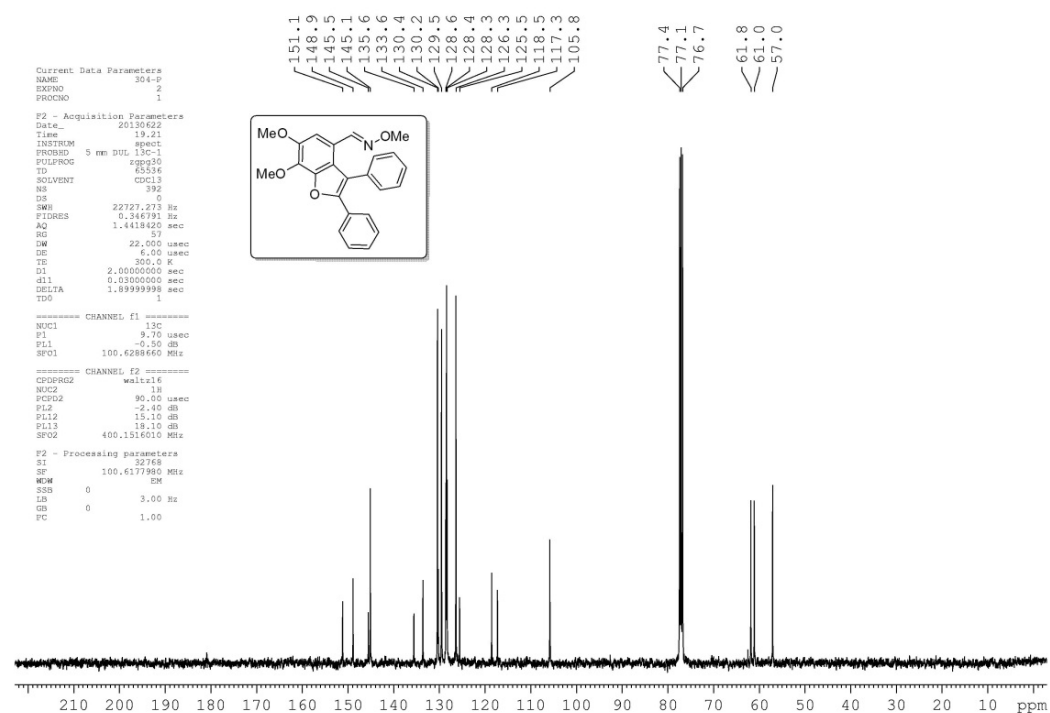

# <sup>1</sup>H and <sup>13</sup>C spectra of compound 3da

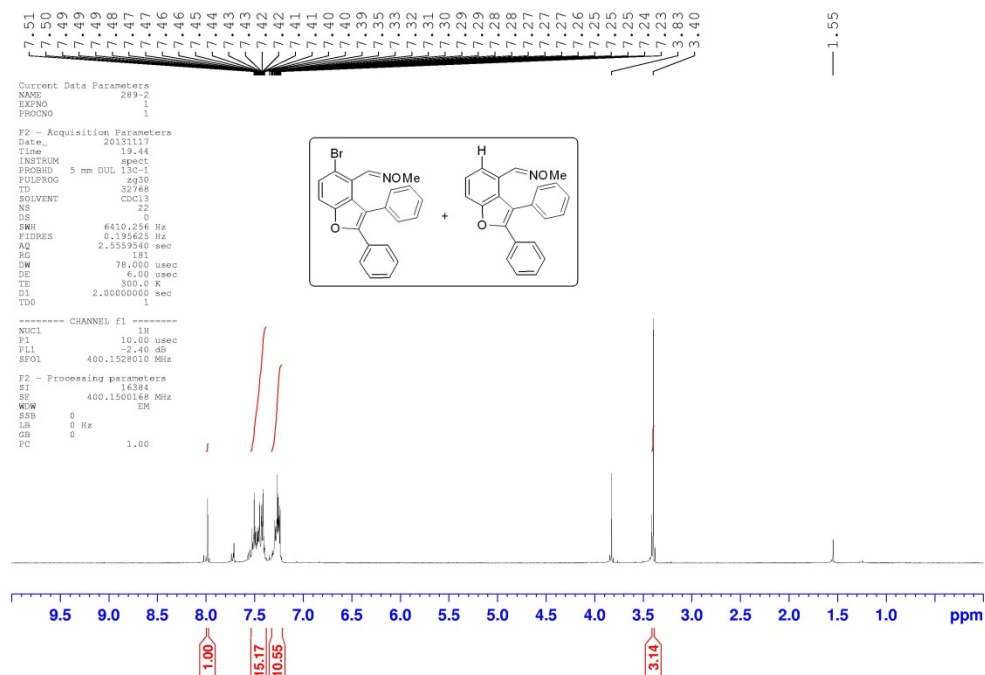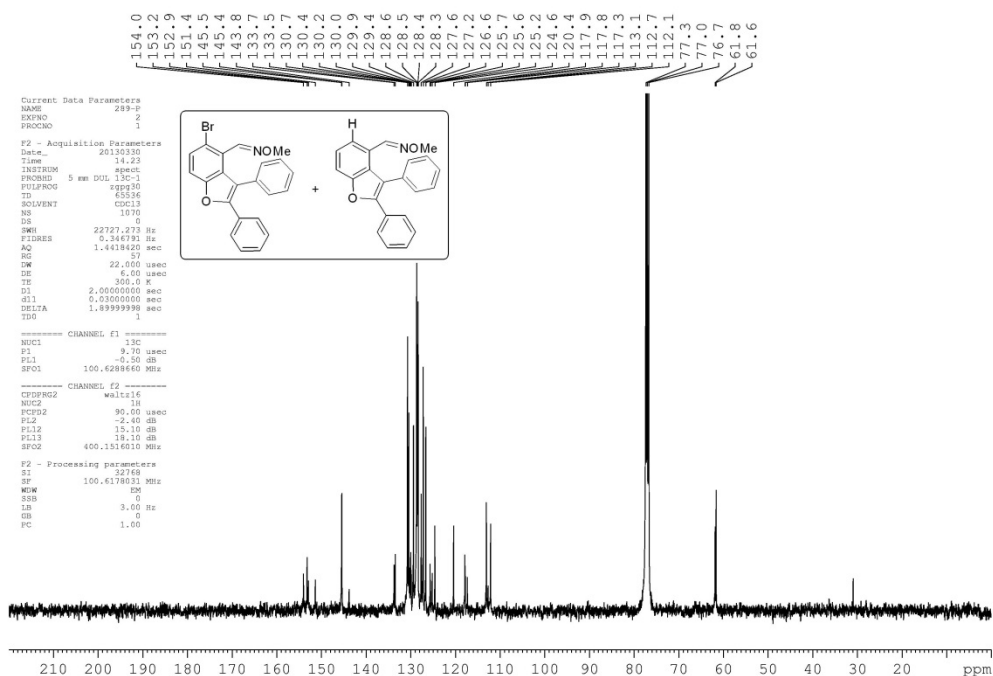

# <sup>1</sup>H and <sup>13</sup>C spectra of compound 3ea

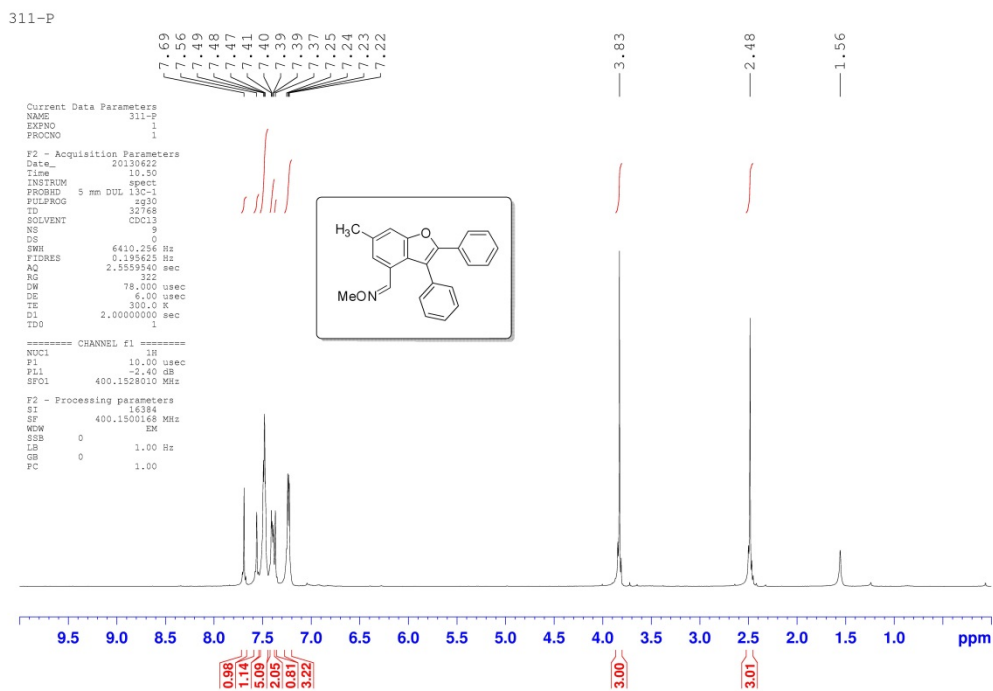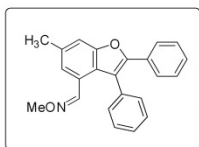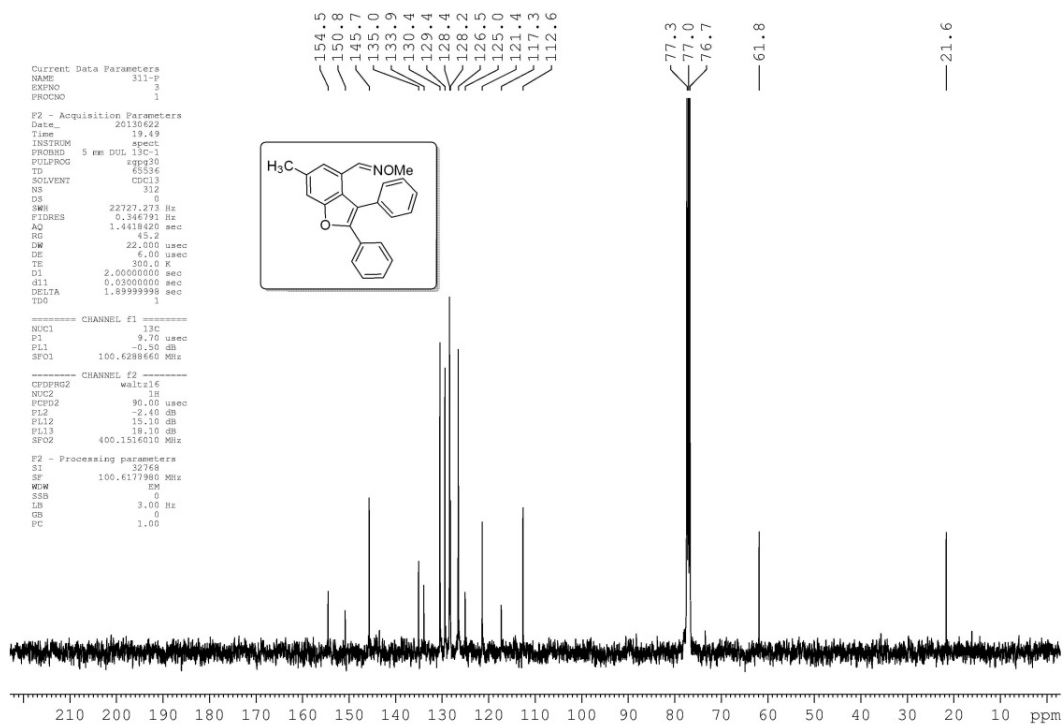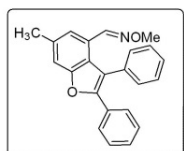

# <sup>1</sup>H and <sup>13</sup>C spectra of compound 3fa

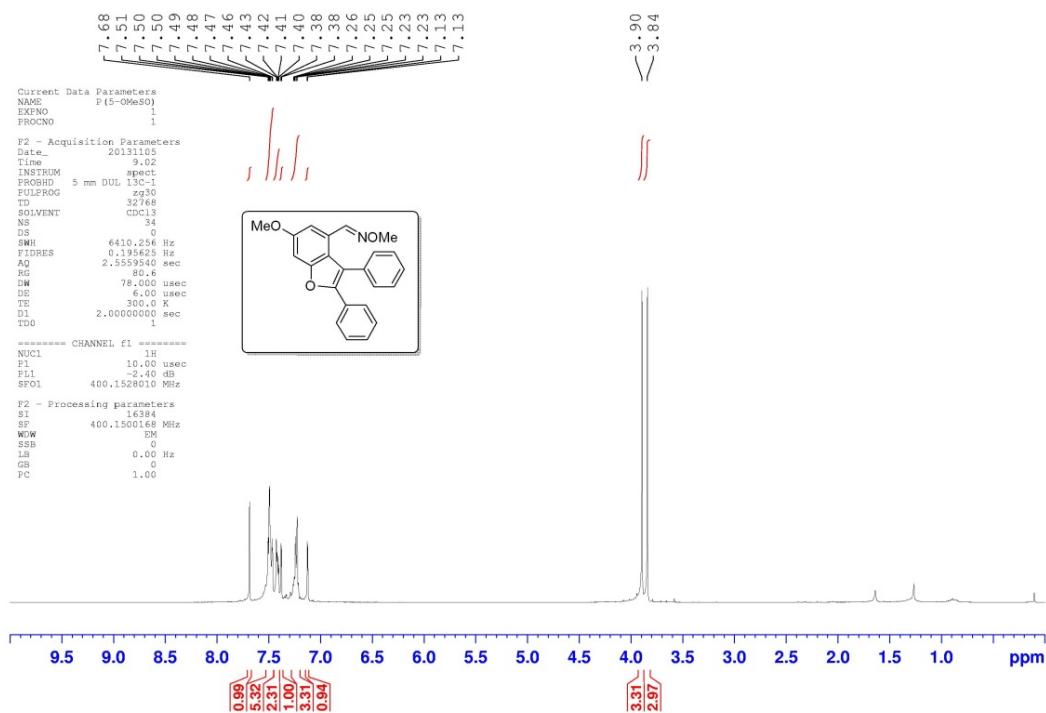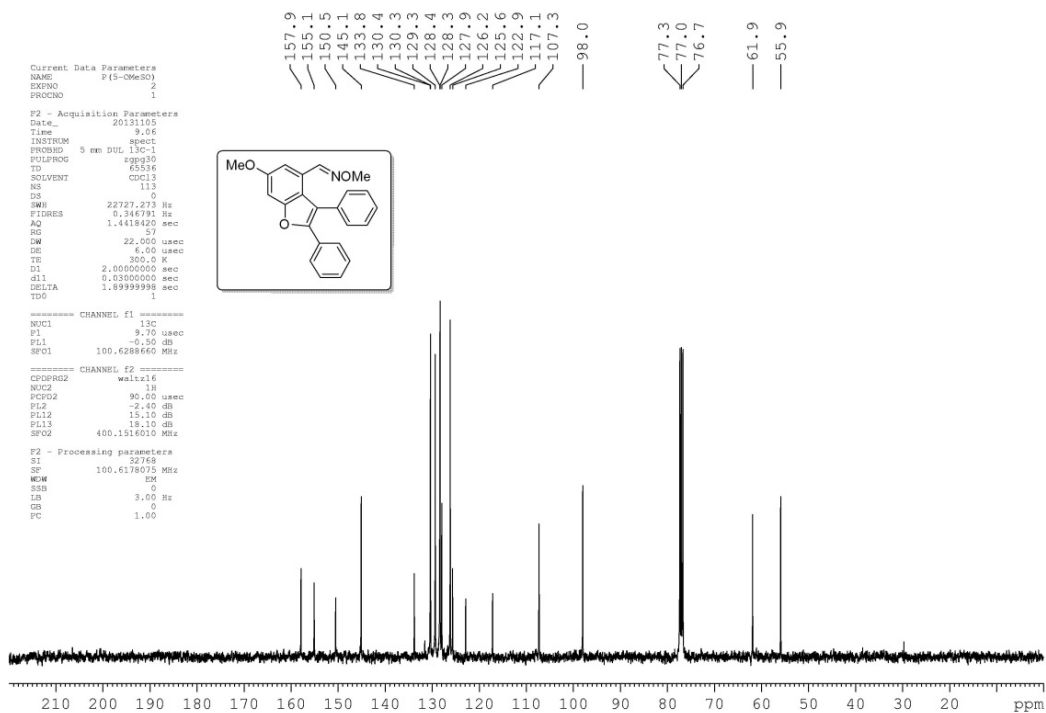

# <sup>1</sup>H and <sup>13</sup>C spectra of compound 3ga

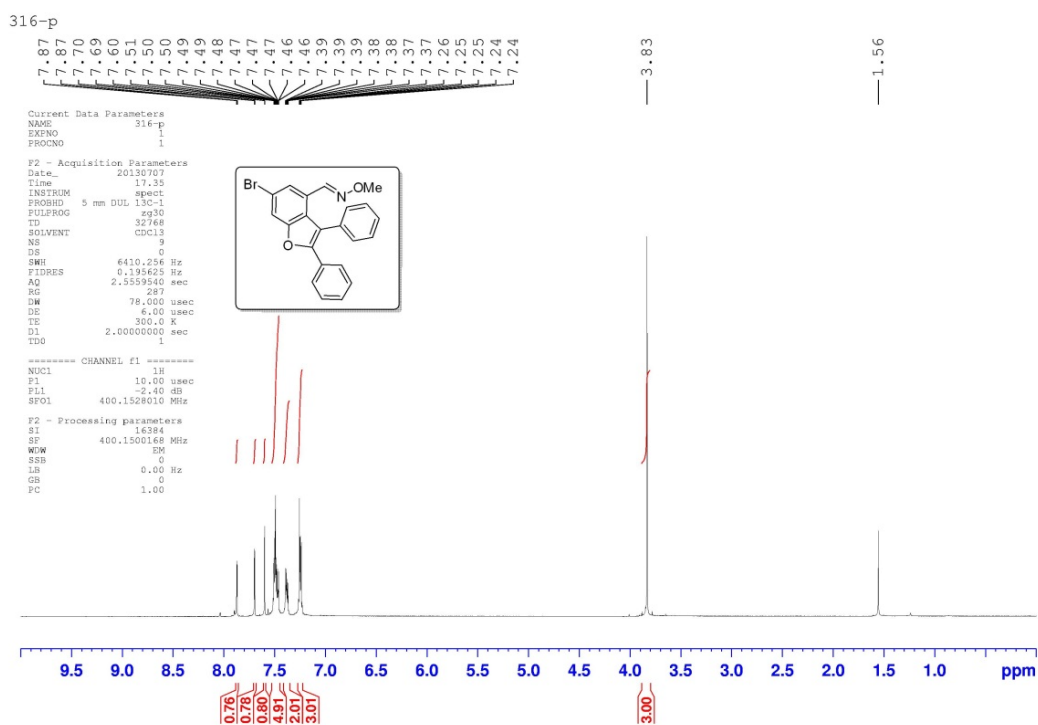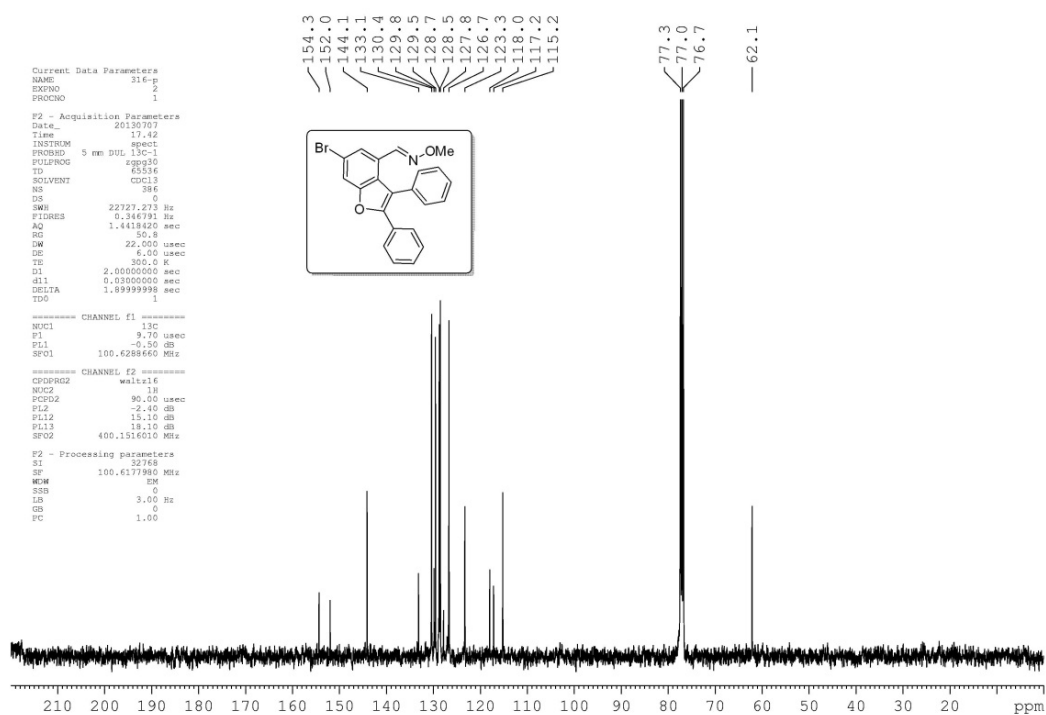

# <sup>1</sup>H and <sup>13</sup>C spectra of compound 3ha

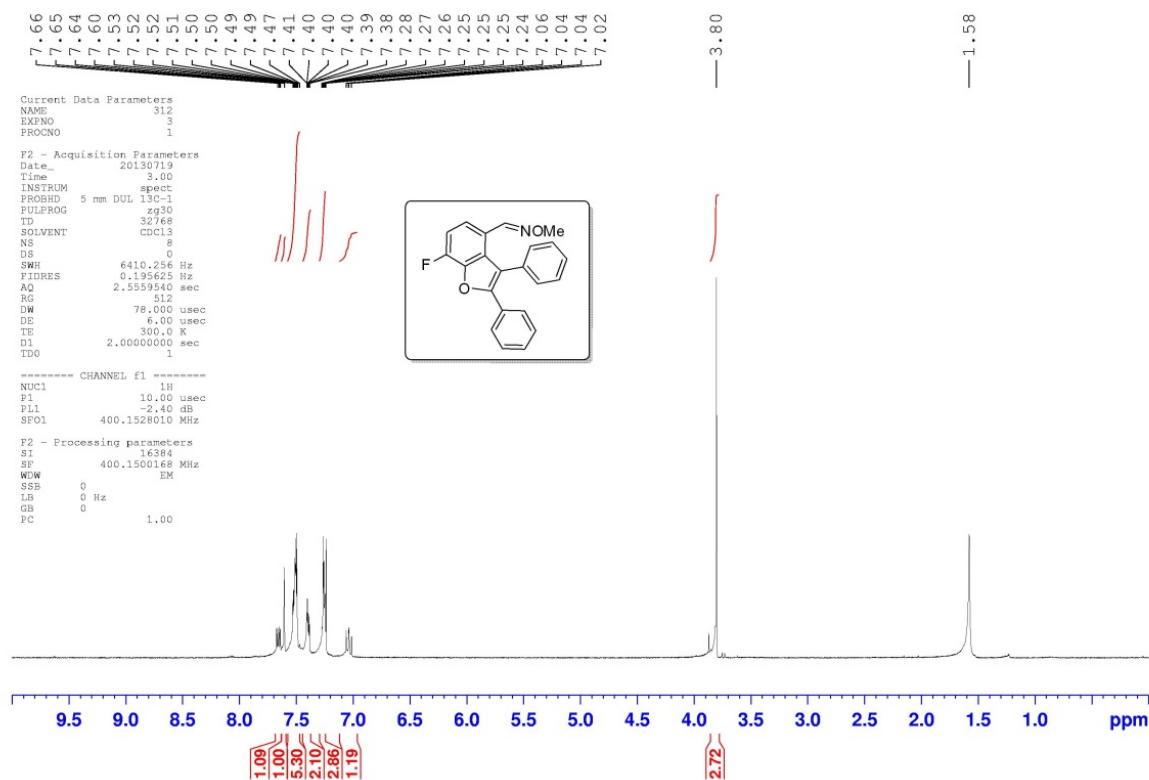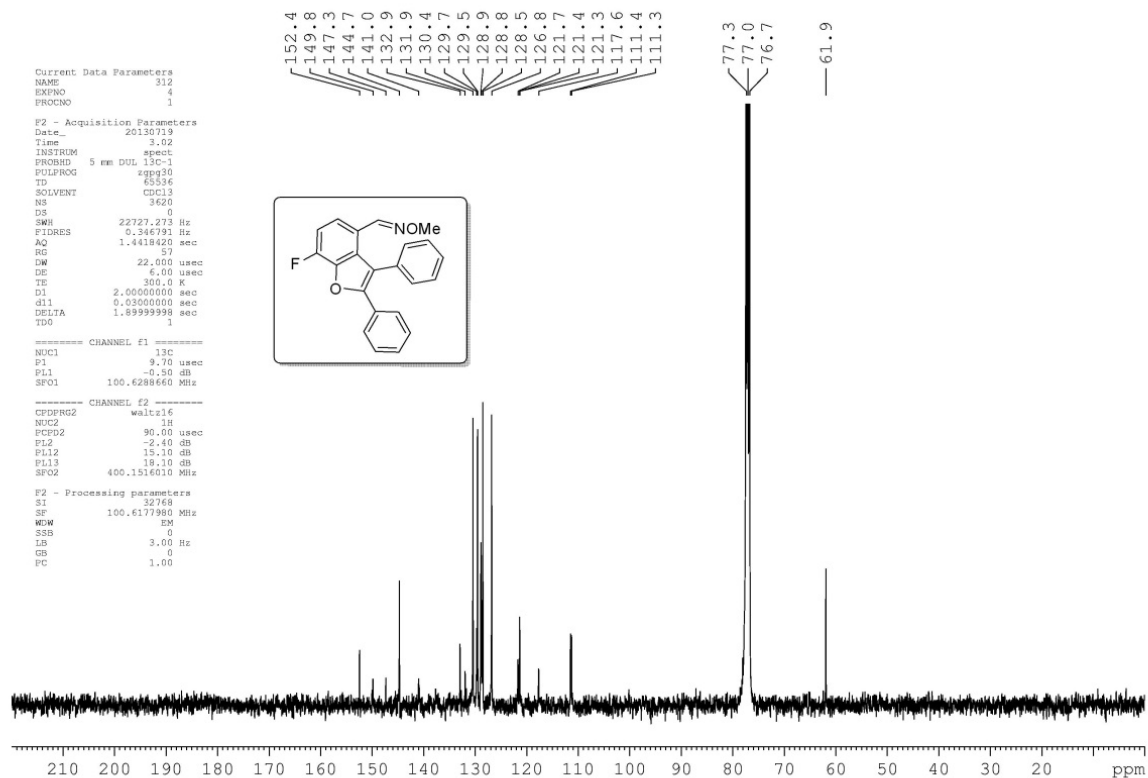



<sup>1</sup>H and <sup>13</sup>C spectra of compound 3ia

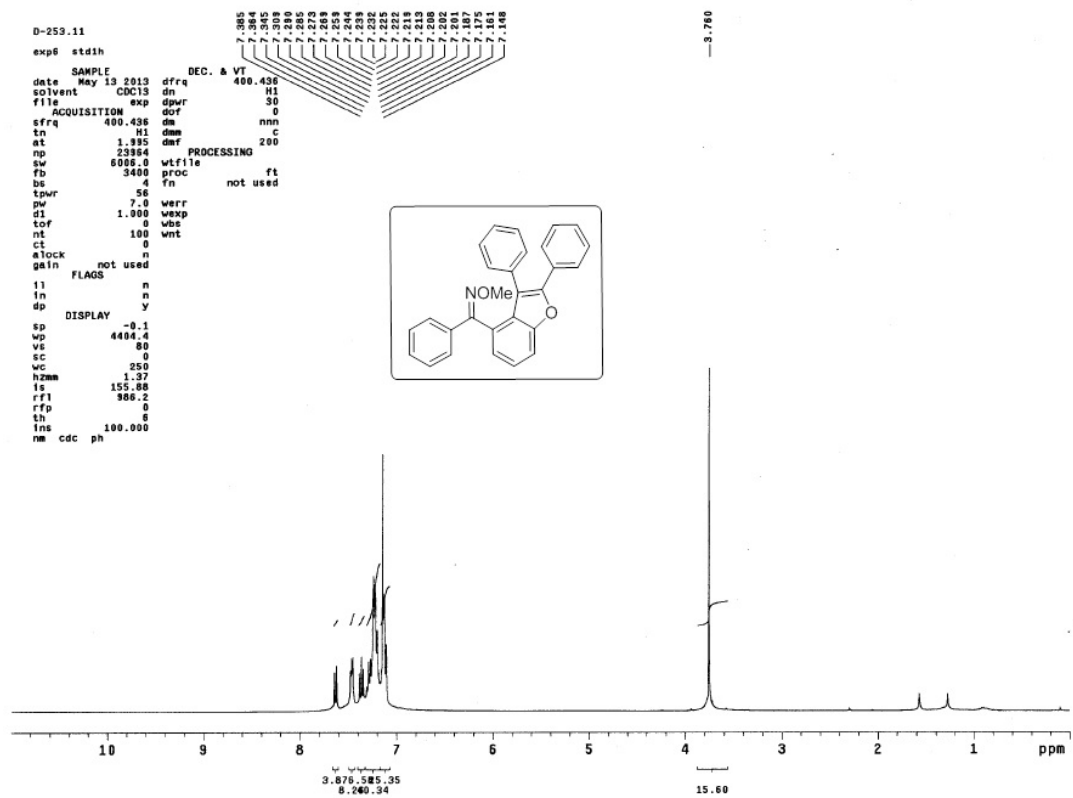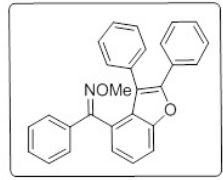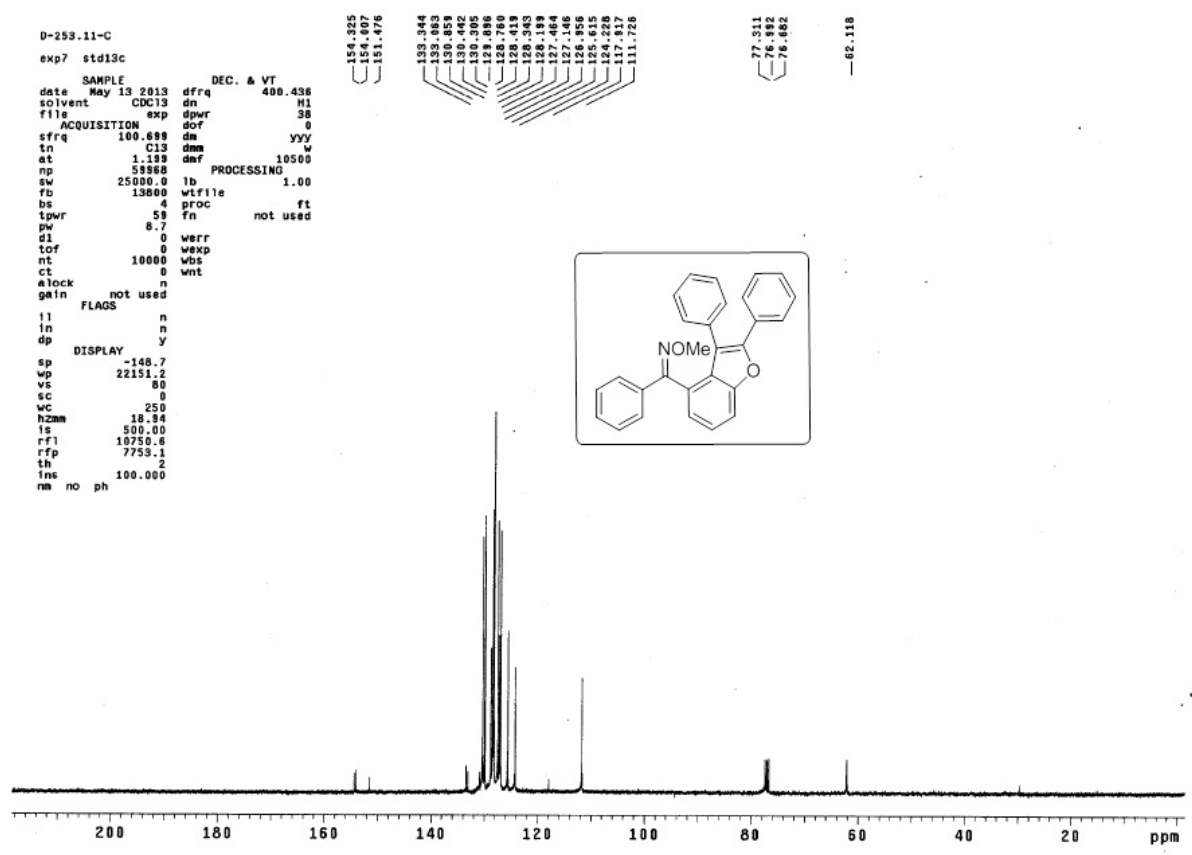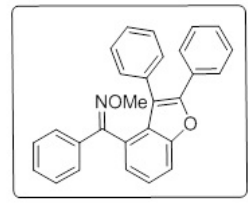

<sup>1</sup>H and <sup>13</sup>C spectra of compound 3ja

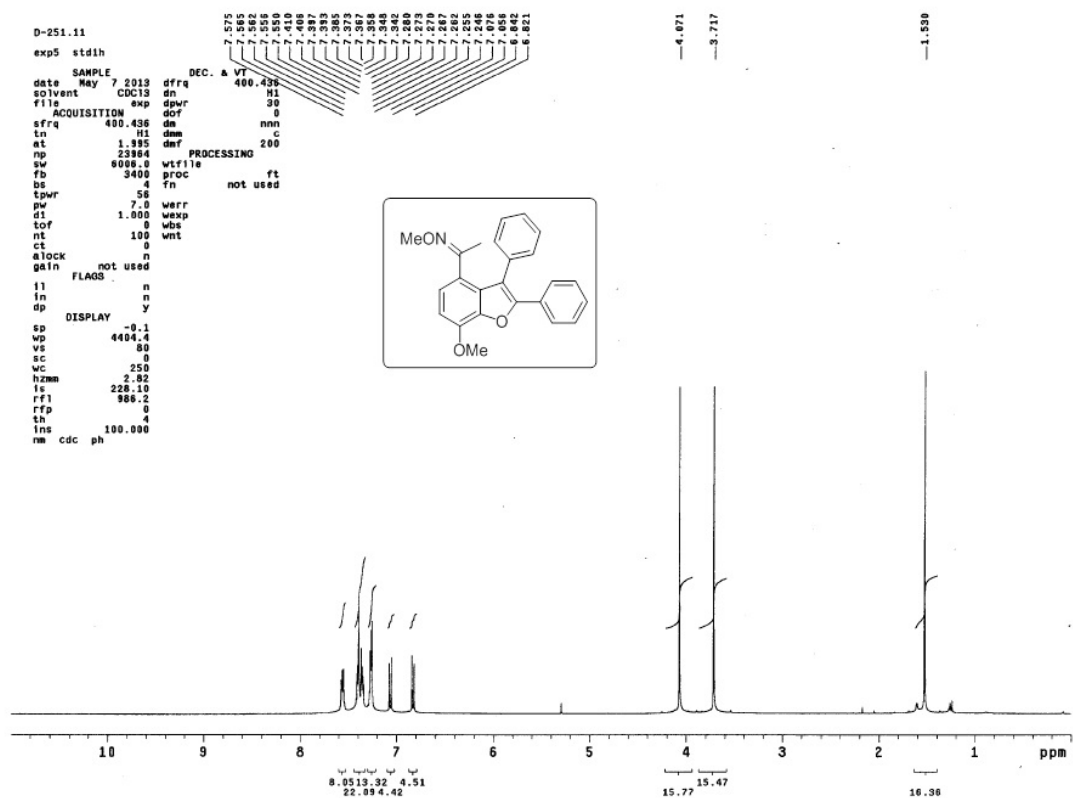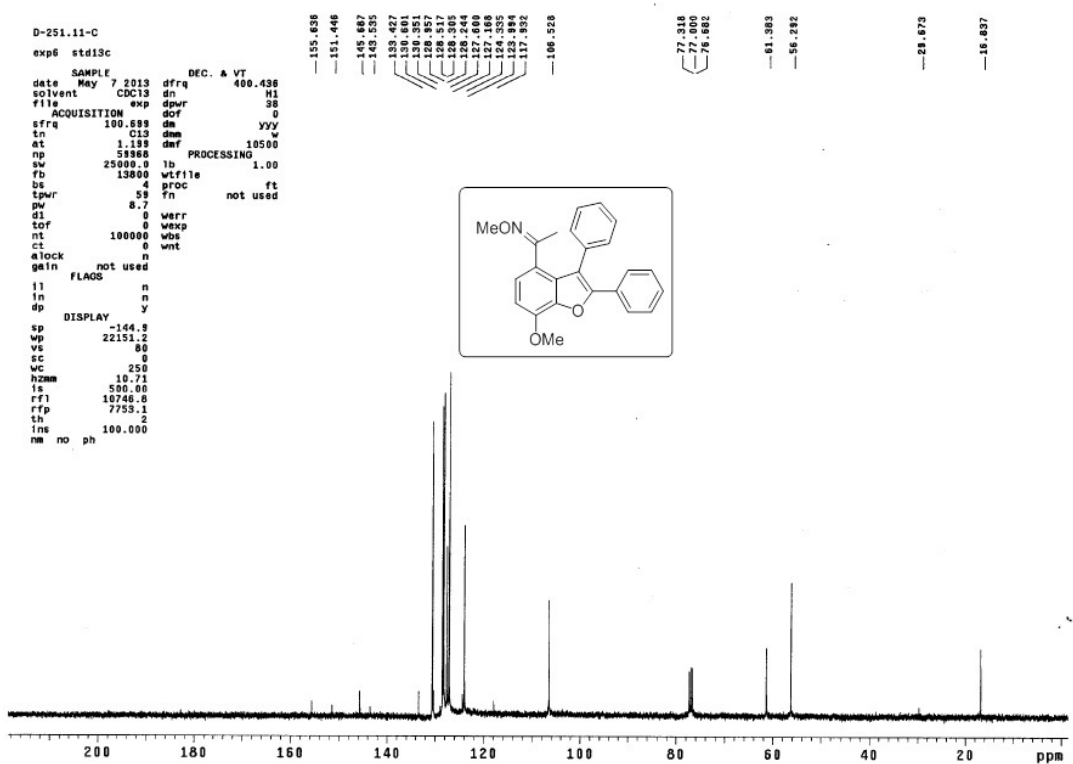

$^1\text{H}$  and  $^{13}\text{C}$  spectra of compound **3ka**

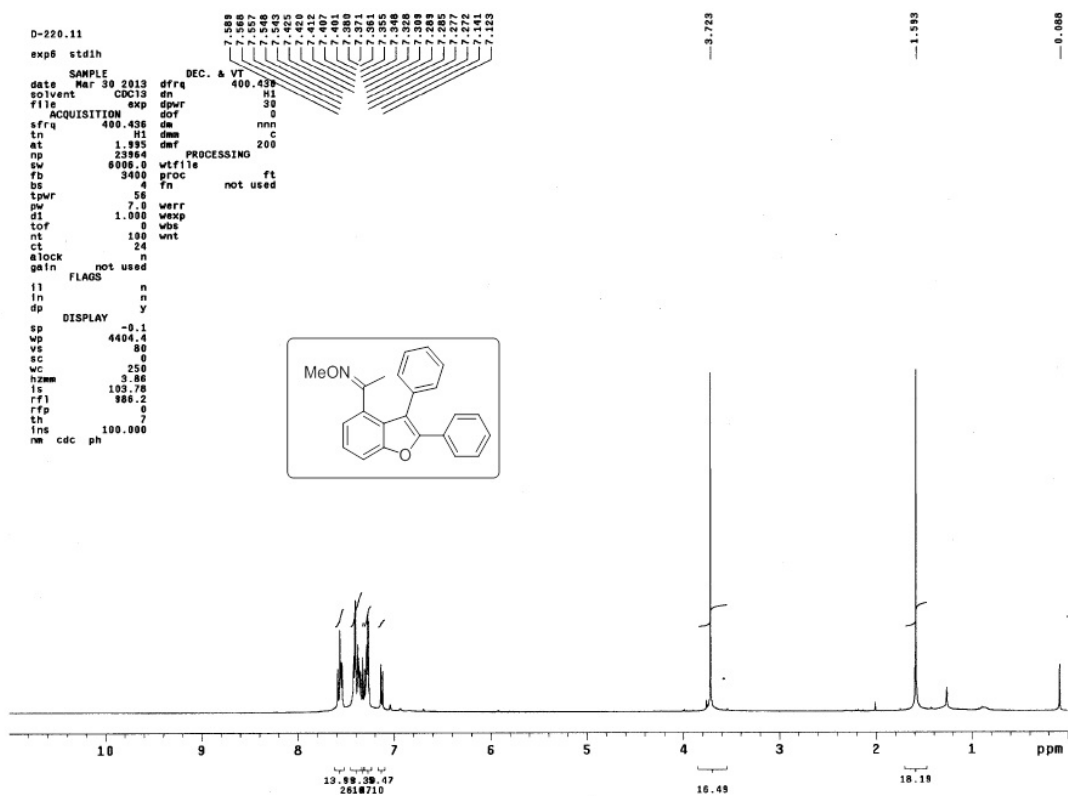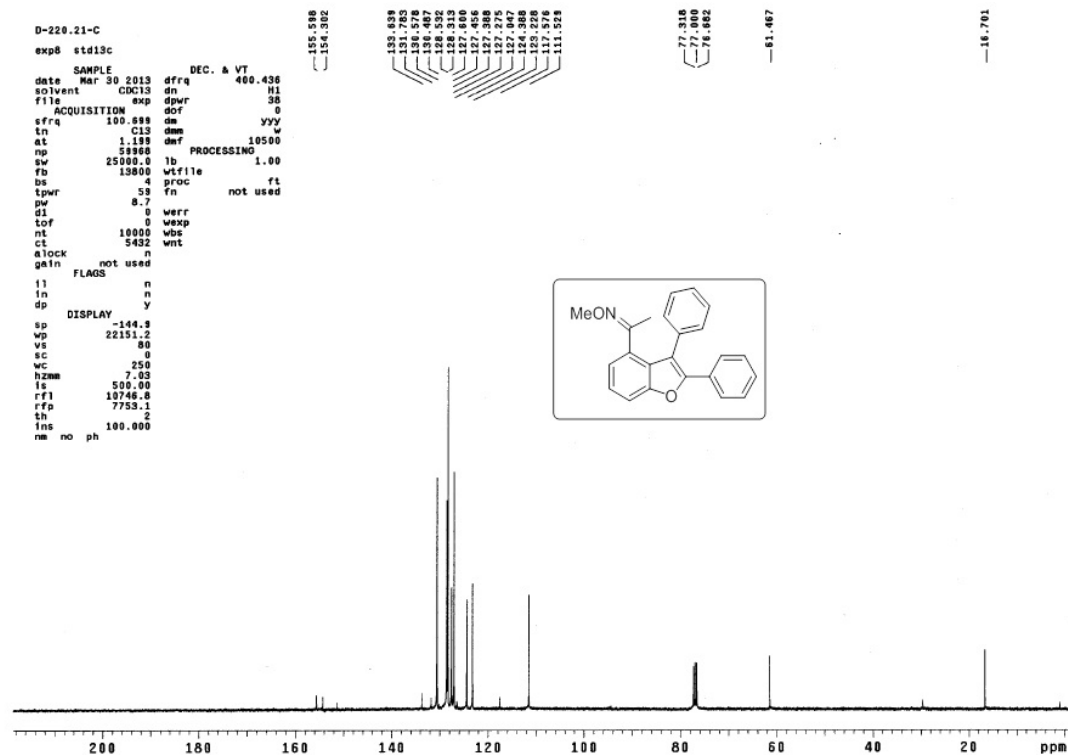

<sup>1</sup>H and <sup>13</sup>C spectra of compound 3la

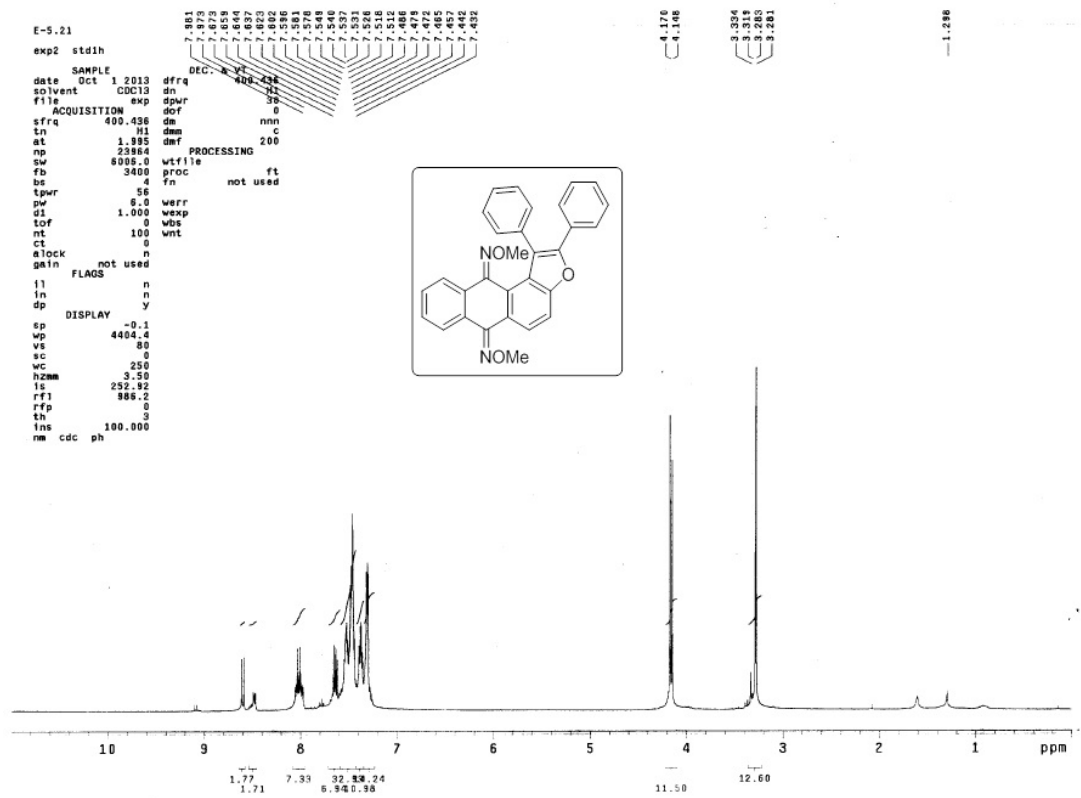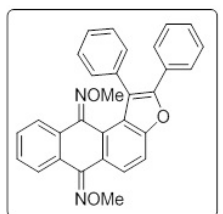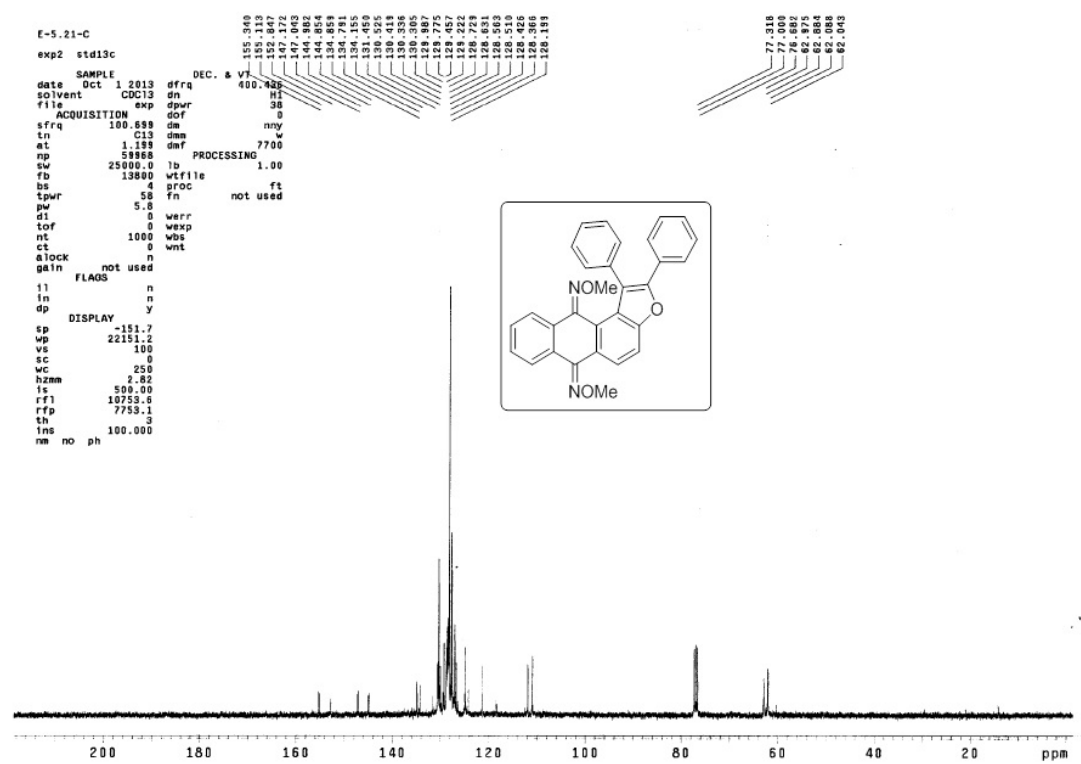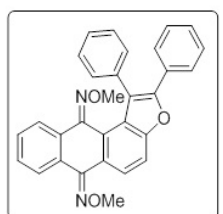

<sup>1</sup>H and <sup>13</sup>C spectra of compound **3ma**

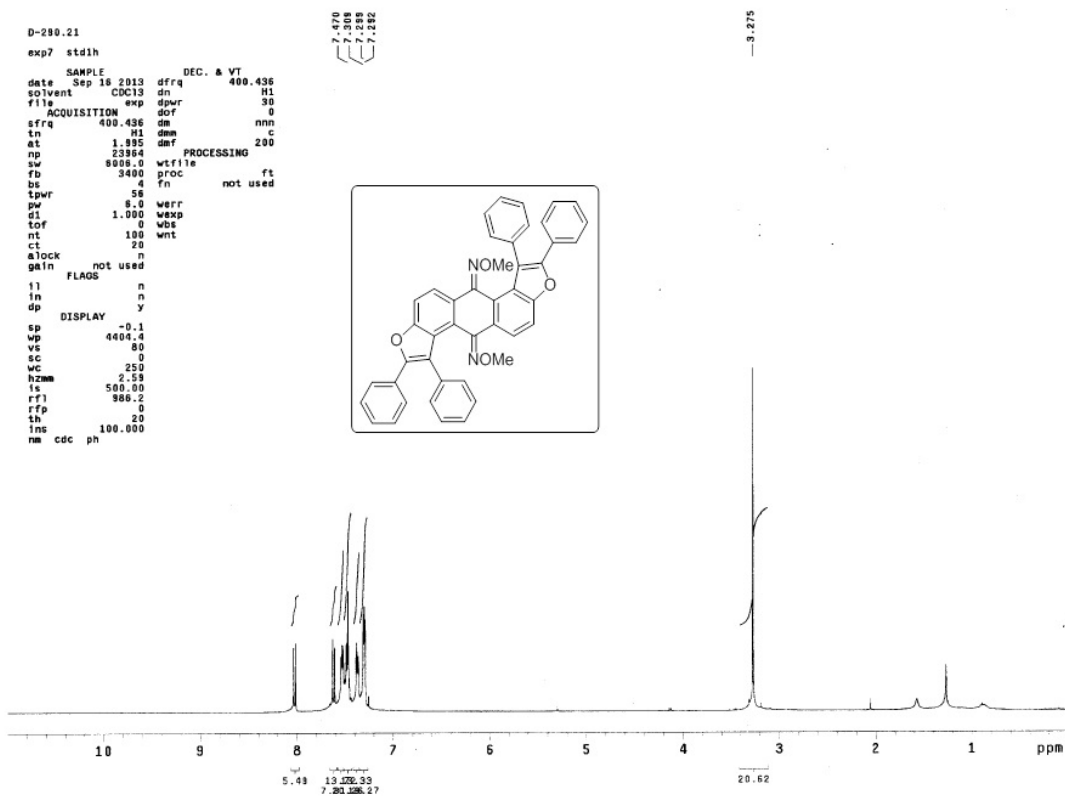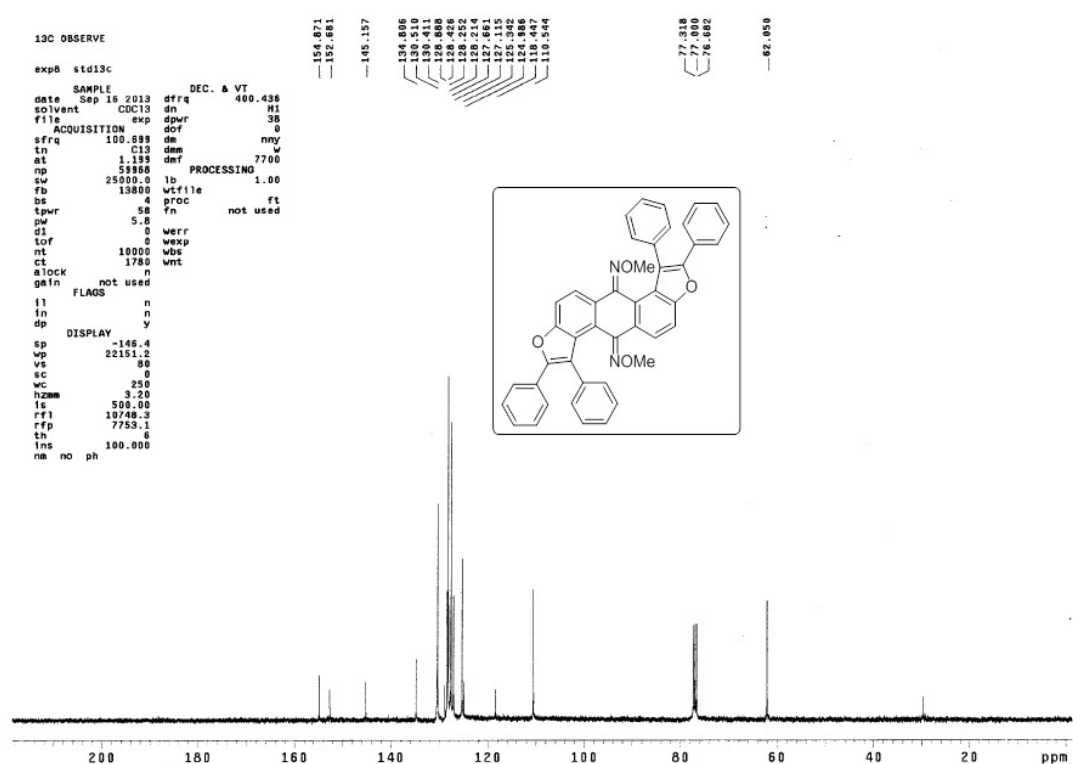

$^1\text{H}$  and  $^{13}\text{C}$  spectra of compound **3na**

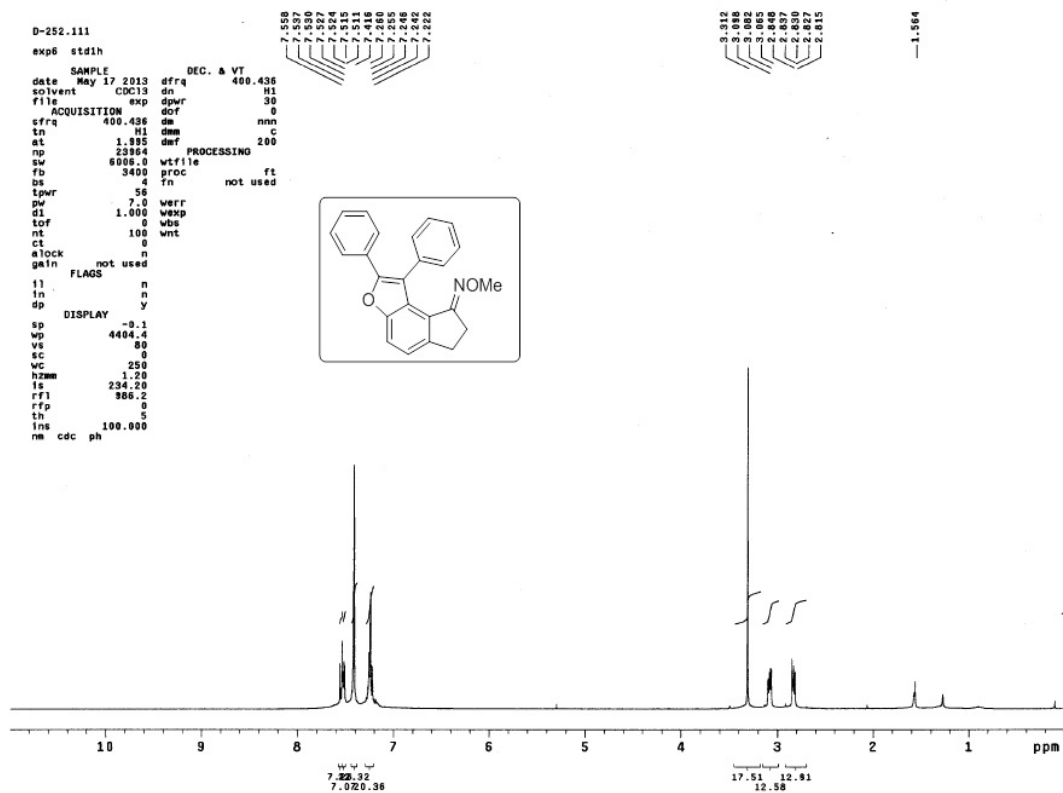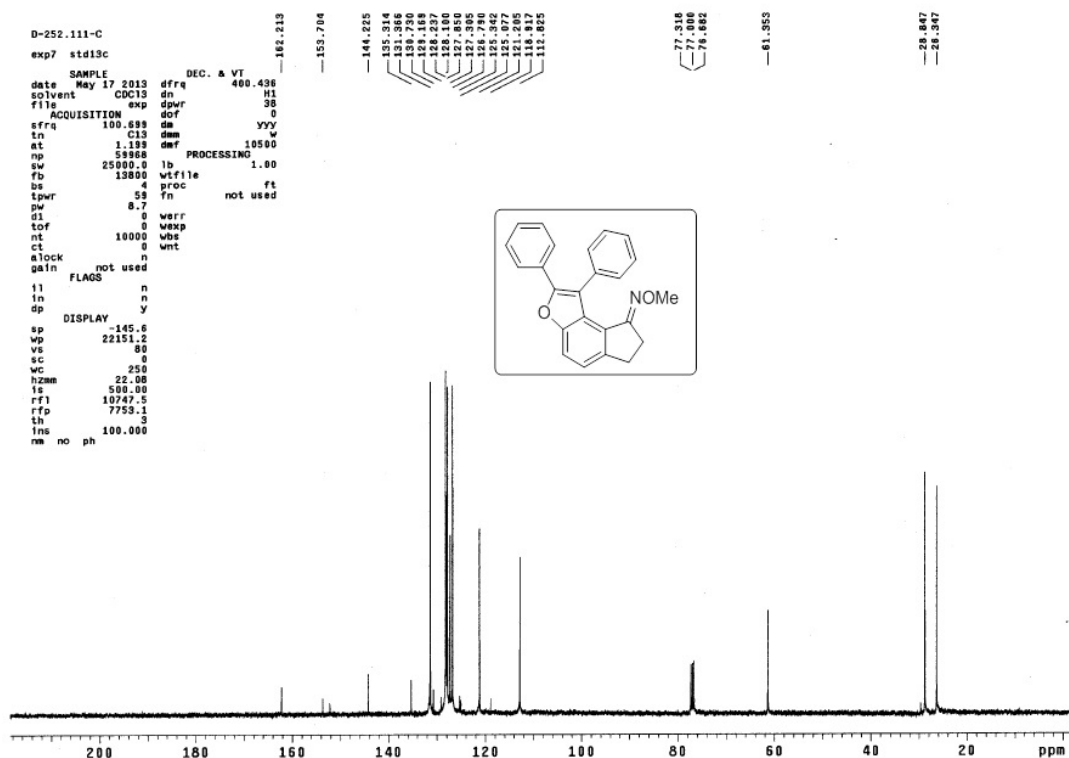

$^1\text{H}$  and  $^{13}\text{C}$  spectra of compound **30a**

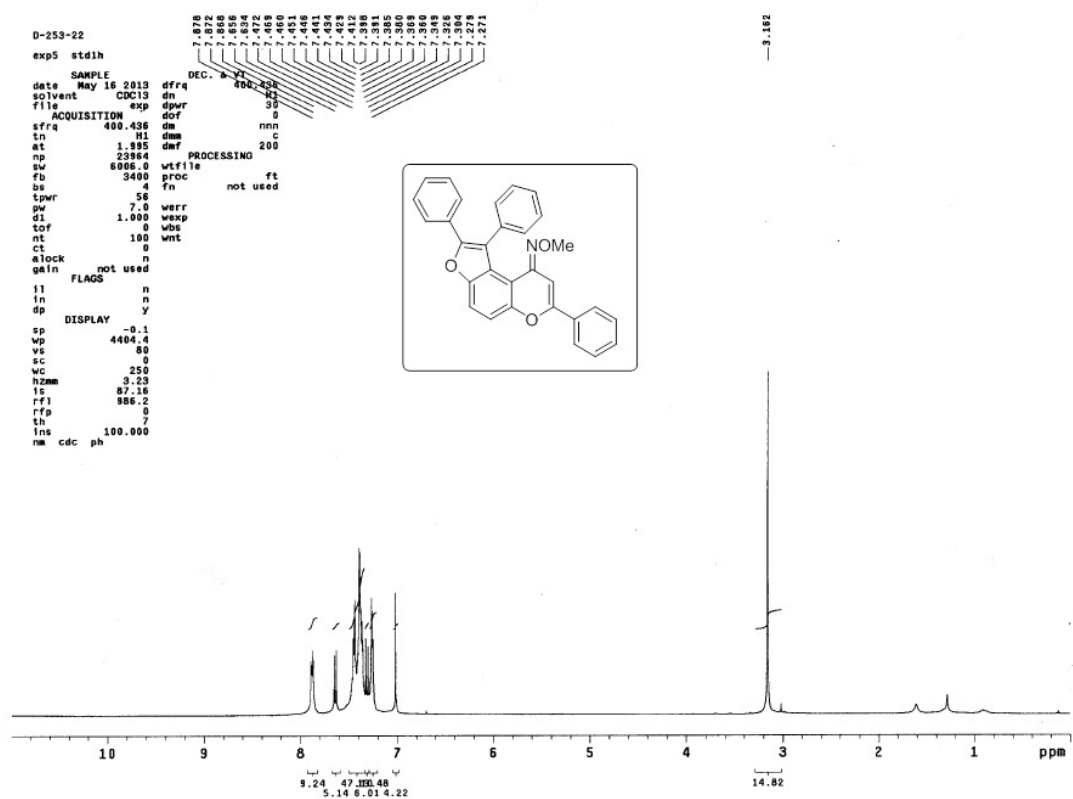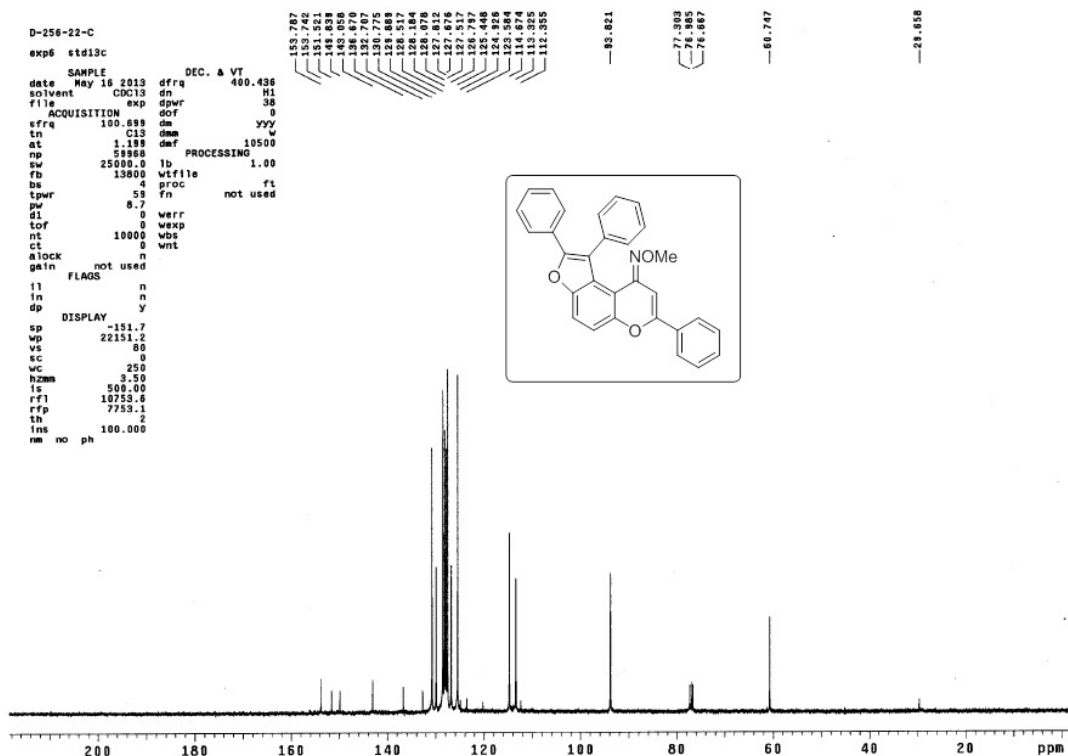

# $^1\text{H}$ and $^{13}\text{C}$ spectra of compound 4

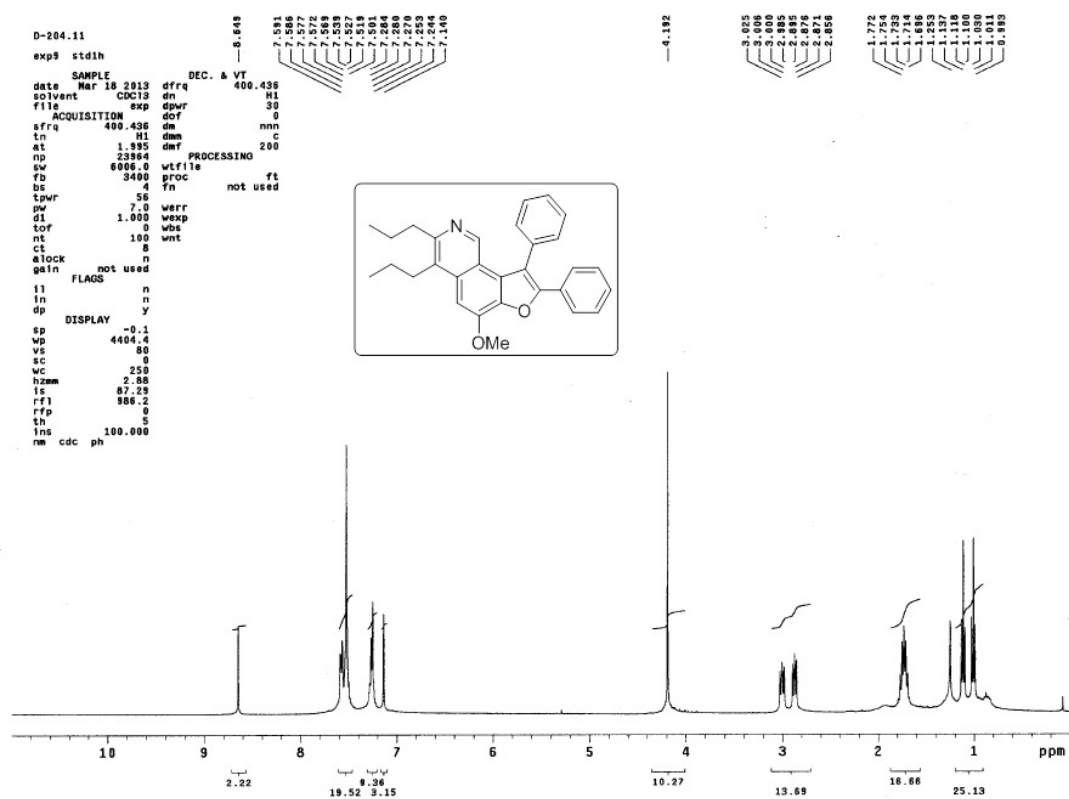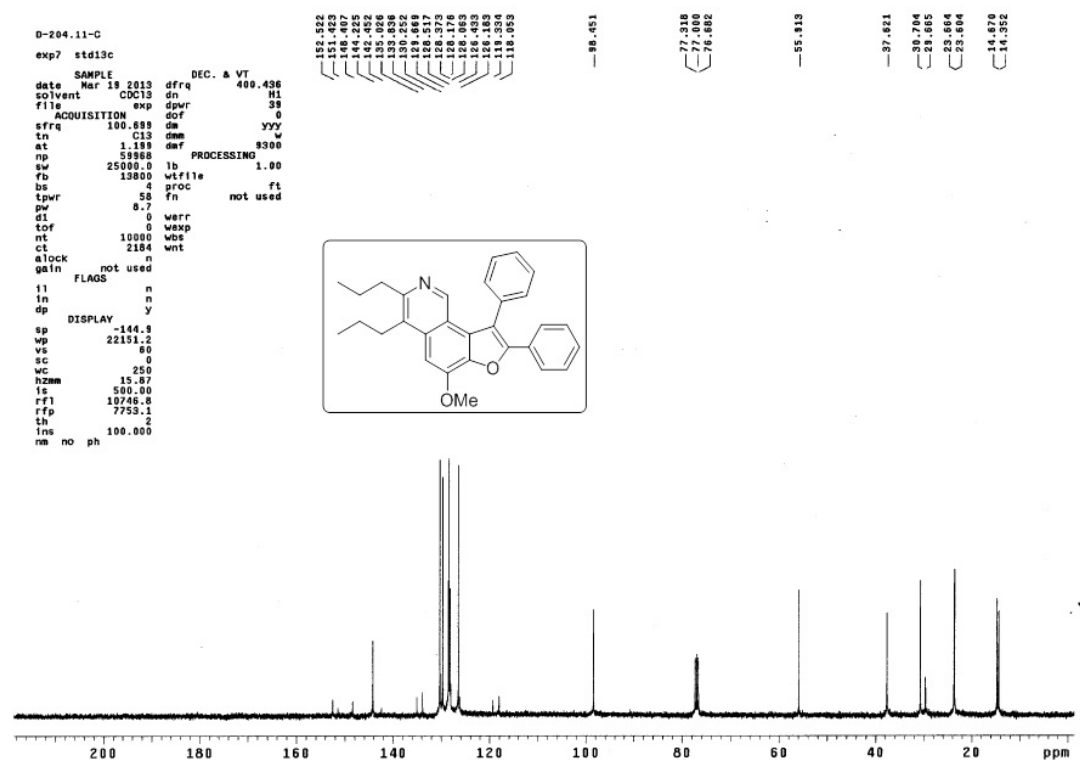



## The X-ray structure

X-ray structure of **3aa**

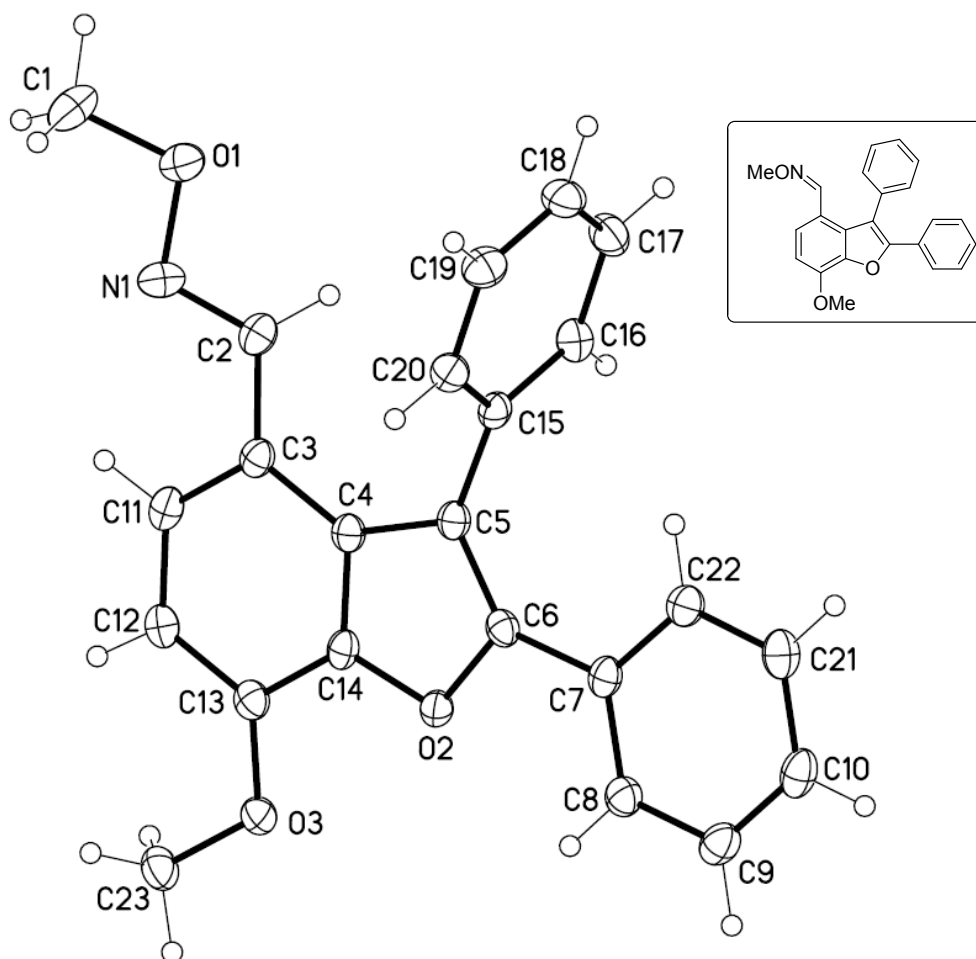

Table 1. Crystal data and structure refinement for mo\_130319lt\_0m (**3aa**).

|                        |                                                  |                                |
|------------------------|--------------------------------------------------|--------------------------------|
| Identification code    | mo_130319lt_0m                                   |                                |
| Empirical formula      | C <sub>23</sub> H <sub>19</sub> N O <sub>3</sub> |                                |
| Formula weight         | 357.39                                           |                                |
| Temperature            | 100(2) K                                         |                                |
| Wavelength             | 0.71073 Å                                        |                                |
| Crystal system         | Monoclinic                                       |                                |
| Space group            | P 1 21/c 1                                       |                                |
| Unit cell dimensions   | a = 11.2184(5) Å                                 | $\alpha = 90^\circ$ .          |
|                        | b = 11.0939(5) Å                                 | $\beta = 103.1300(10)^\circ$ . |
|                        | c = 15.1186(7) Å                                 | $\gamma = 90^\circ$ .          |
| Volume                 | 1832.41(14) Å <sup>3</sup>                       |                                |
| Z                      | 4                                                |                                |
| Density (calculated)   | 1.295 Mg/m <sup>3</sup>                          |                                |
| Absorption coefficient | 0.086 mm <sup>-1</sup>                           |                                |

|                                   |                                             |
|-----------------------------------|---------------------------------------------|
| F(000)                            | 752                                         |
| Crystal size                      | 0.30 x 0.28 x 0.26 mm <sup>3</sup>          |
| Theta range for data collection   | 1.86 to 26.42°.                             |
| Index ranges                      | -14<=h<=8, -13<=k<=13, -16<=l<=18           |
| Reflections collected             | 14922                                       |
| Independent reflections           | 3747 [R(int) = 0.0289]                      |
| Completeness to theta = 26.42°    | 99.6 %                                      |
| Absorption correction             | Semi-empirical from equivalents             |
| Max. and min. transmission        | 0.9486 and 0.8897                           |
| Refinement method                 | Full-matrix least-squares on F <sup>2</sup> |
| Data / restraints / parameters    | 3747 / 0 / 246                              |
| Goodness-of-fit on F <sup>2</sup> | 1.019                                       |
| Final R indices [I>2sigma(I)]     | R1 = 0.0400, wR2 = 0.0983                   |
| R indices (all data)              | R1 = 0.0506, wR2 = 0.1053                   |
| Largest diff. peak and hole       | 0.576 and -0.210 e.Å <sup>-3</sup>          |

X-ray structure of **3ga**

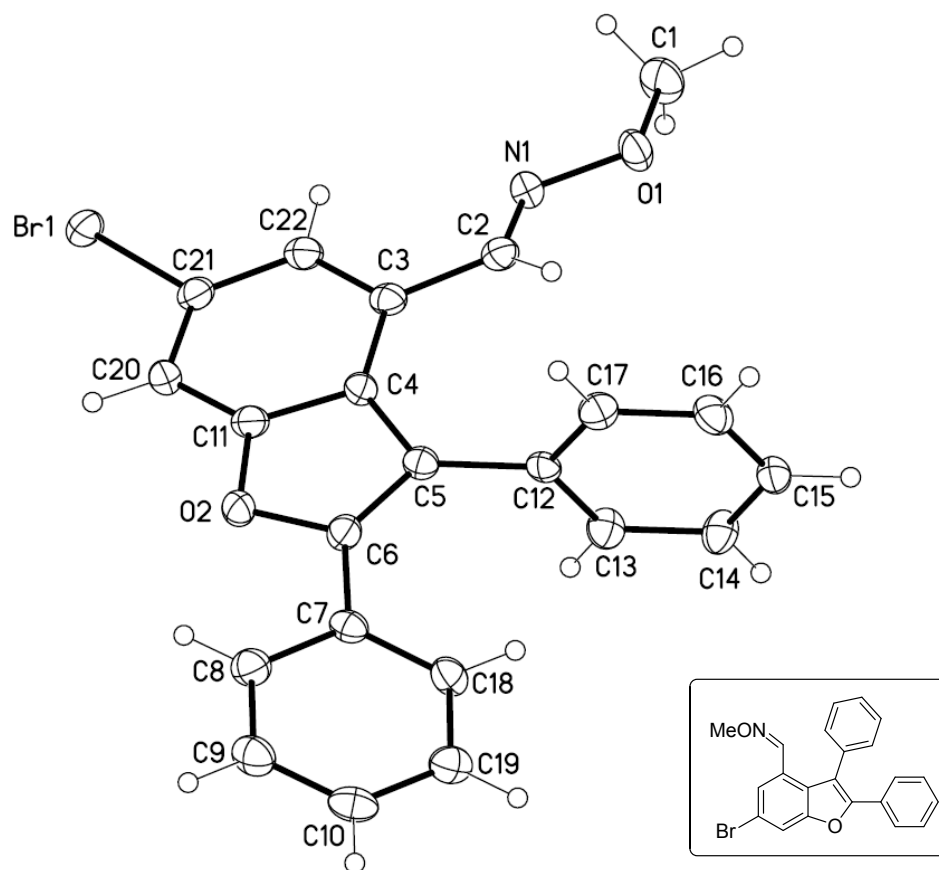

Table 1. Crystal data and structure refinement for 130931LT (**3ga**).

|                        |                                                     |                 |
|------------------------|-----------------------------------------------------|-----------------|
| Identification code    | 130931lt                                            |                 |
| Empirical formula      | C <sub>22</sub> H <sub>16</sub> Br N O <sub>2</sub> |                 |
| Formula weight         | 406.27                                              |                 |
| Temperature            | 100(2) K                                            |                 |
| Wavelength             | 0.71073 Å                                           |                 |
| Crystal system         | Monoclinic                                          |                 |
| Space group            | P 1 21/c 1                                          |                 |
| Unit cell dimensions   | a = 17.3636(16) Å                                   | α = 90°.        |
|                        | b = 10.3459(9) Å                                    | β = 92.111(2)°. |
|                        | c = 9.9494(10) Å                                    | γ = 90°.        |
| Volume                 | 1786.1(3) Å <sup>3</sup>                            |                 |
| Z                      | 4                                                   |                 |
| Density (calculated)   | 1.511 Mg/m <sup>3</sup>                             |                 |
| Absorption coefficient | 2.317 mm <sup>-1</sup>                              |                 |
| F(000)                 | 824                                                 |                 |
| Crystal size           | 0.25 x 0.20 x 0.20 mm <sup>3</sup>                  |                 |

|                                   |                                             |
|-----------------------------------|---------------------------------------------|
| Theta range for data collection   | 1.17 to 26.42°.                             |
| Index ranges                      | -21<=h<=21, -12<=k<=12, -12<=l<=12          |
| Reflections collected             | 14119                                       |
| Independent reflections           | 3664 [R(int) = 0.0353]                      |
| Completeness to theta = 26.42°    | 99.6 %                                      |
| Absorption correction             | Semi-empirical from equivalents             |
| Max. and min. transmission        | 0.9486 and 0.7854                           |
| Refinement method                 | Full-matrix least-squares on F <sup>2</sup> |
| Data / restraints / parameters    | 3664 / 0 / 236                              |
| Goodness-of-fit on F <sup>2</sup> | 1.130                                       |
| Final R indices [I>2sigma(I)]     | R1 = 0.0256, wR2 = 0.0615                   |
| R indices (all data)              | R1 = 0.0388, wR2 = 0.0786                   |
| Largest diff. peak and hole       | 0.344 and -0.289 e.Å <sup>-3</sup>          |

### X-ray structure of **3ma**

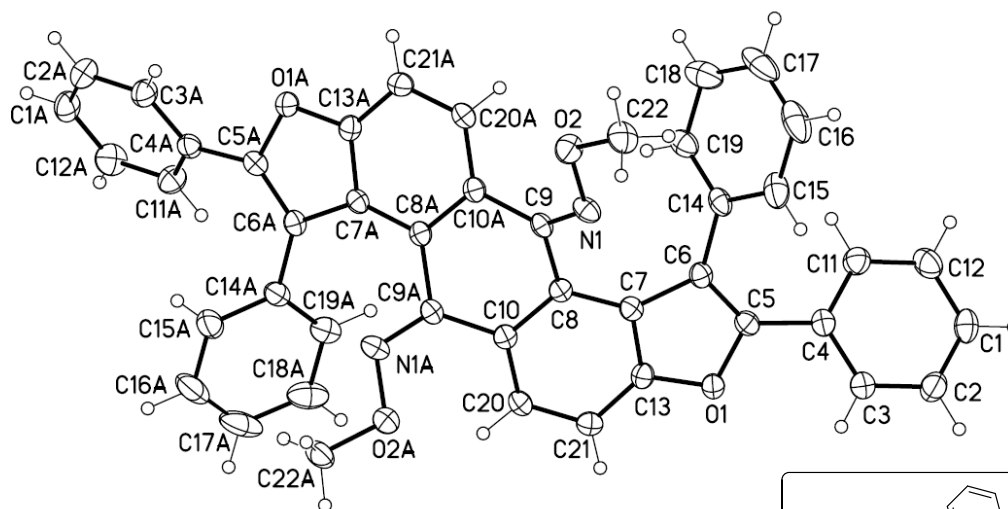

Table 1. Crystal data and structure refinement for mo\_130940lt\_0m(**3ma**).

|                                 |                                                               |                  |
|---------------------------------|---------------------------------------------------------------|------------------|
| Identification code             | mo_130940lt_0m                                                |                  |
| Empirical formula               | C <sub>44</sub> H <sub>30</sub> N <sub>2</sub> O <sub>4</sub> |                  |
| Formula weight                  | 650.70                                                        |                  |
| Temperature                     | 100(2) K                                                      |                  |
| Wavelength                      | 0.71073 Å                                                     |                  |
| Crystal system                  | Monoclinic                                                    |                  |
| Space group                     | C 1 2/c 1                                                     |                  |
| Unit cell dimensions            | a = 25.919(3) Å                                               | α = 90°.         |
|                                 | b = 11.2554(14) Å                                             | β = 101.271(2)°. |
|                                 | c = 11.6261(14) Å                                             | γ = 90°.         |
| Volume                          | 3326.3(7) Å <sup>3</sup>                                      |                  |
| Z                               | 4                                                             |                  |
| Density (calculated)            | 1.299 Mg/m <sup>3</sup>                                       |                  |
| Absorption coefficient          | 0.083 mm <sup>-1</sup>                                        |                  |
| F(000)                          | 1360                                                          |                  |
| Crystal size                    | 0.25 x 0.22 x 0.15 mm <sup>3</sup>                            |                  |
| Theta range for data collection | 1.60 to 26.48°.                                               |                  |
| Index ranges                    | -32 ≤ h ≤ 32, -14 ≤ k ≤ 13, -14 ≤ l ≤ 14                      |                  |
| Reflections collected           | 13500                                                         |                  |
| Independent reflections         | 3428 [R(int) = 0.0487]                                        |                  |
| Completeness to theta = 26.48°  | 99.6 %                                                        |                  |
| Absorption correction           | Semi-empirical from equivalents                               |                  |
| Max. and min. transmission      | 0.9486 and 0.8035                                             |                  |
| Refinement method               | Full-matrix least-squares on F <sup>2</sup>                   |                  |

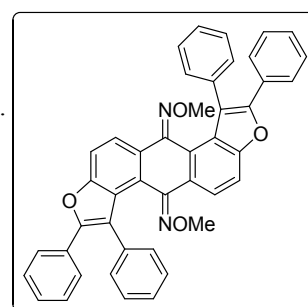

|                                      |                                       |
|--------------------------------------|---------------------------------------|
| Data / restraints / parameters       | 3428 / 0 / 227                        |
| Goodness-of-fit on $F^2$             | 1.031                                 |
| Final R indices [ $I > 2\sigma(I)$ ] | R1 = 0.0494, wR2 = 0.1252             |
| R indices (all data)                 | R1 = 0.0723, wR2 = 0.1394             |
| Largest diff. peak and hole          | 0.835 and -0.249 e. $\text{\AA}^{-3}$ |
